# Supplementary material for: A novel approach for estimating the strength of argentophilic and aurophilic interactions using QTAIM parameters
Source: Royal Society of Chemistry journal article supplement (doi:10.1039/d4cp00410h), 2024-01-01
Supplement: d4cp00410h1.pdf [file d4cp00410h1.pdf]

# A Novel Approach for Estimating the Strength of Argentophilic and Auophilic Interactions using QTAIM Parameters

Sergi Burguera<sup>a</sup>, Antonio Bauzá<sup>a</sup> and Antonio Frontera<sup>a,\*</sup>

<sup>a</sup>Departament de Química, Universitat de les Illes Balears, Crta de Valldemossa Km, 7.5, 07122 Palma de mallorca (Balears), SPAIN.

\*Correspondence: [toni.frontera@uib.es](mailto:toni.frontera@uib.es)

## Table of contents:

1. Regression plots for the argentophilic interaction at the PBE0-D4/def2-TZVP level of theory  
Page 2
2. Regression plots for the auophilic interaction at the PBE0-D4/def2-TZVP level of theory  
Page 3
3. Tetrameric assemblies including the counterions in HAMMIS, UJOQAN and FAZGET  
Page 4
4. Tables of the parameters obtained from the multivariable statistical analyses  
Page 4
5. Tables of the QTAIM parameters from the dimers plotted in figure 6  
Page 4
6. Coordinates of the dimers 1 to 84 at their energetic minimum (PBE0-D4//2c-TZVPall)  
Pages 5-25
7. Coordinates of the dimers 1 to 84 at their energetic minimum (PBE0-D4/def2-TZVP)  
Pages 26-46
8. Coordinates of the dimeric assemblies subtracted from the CSD  
Pages 47-49

# 1. Regression plots for the argentophilic interaction at the PBE0-D4/def2-TZVP level of theory

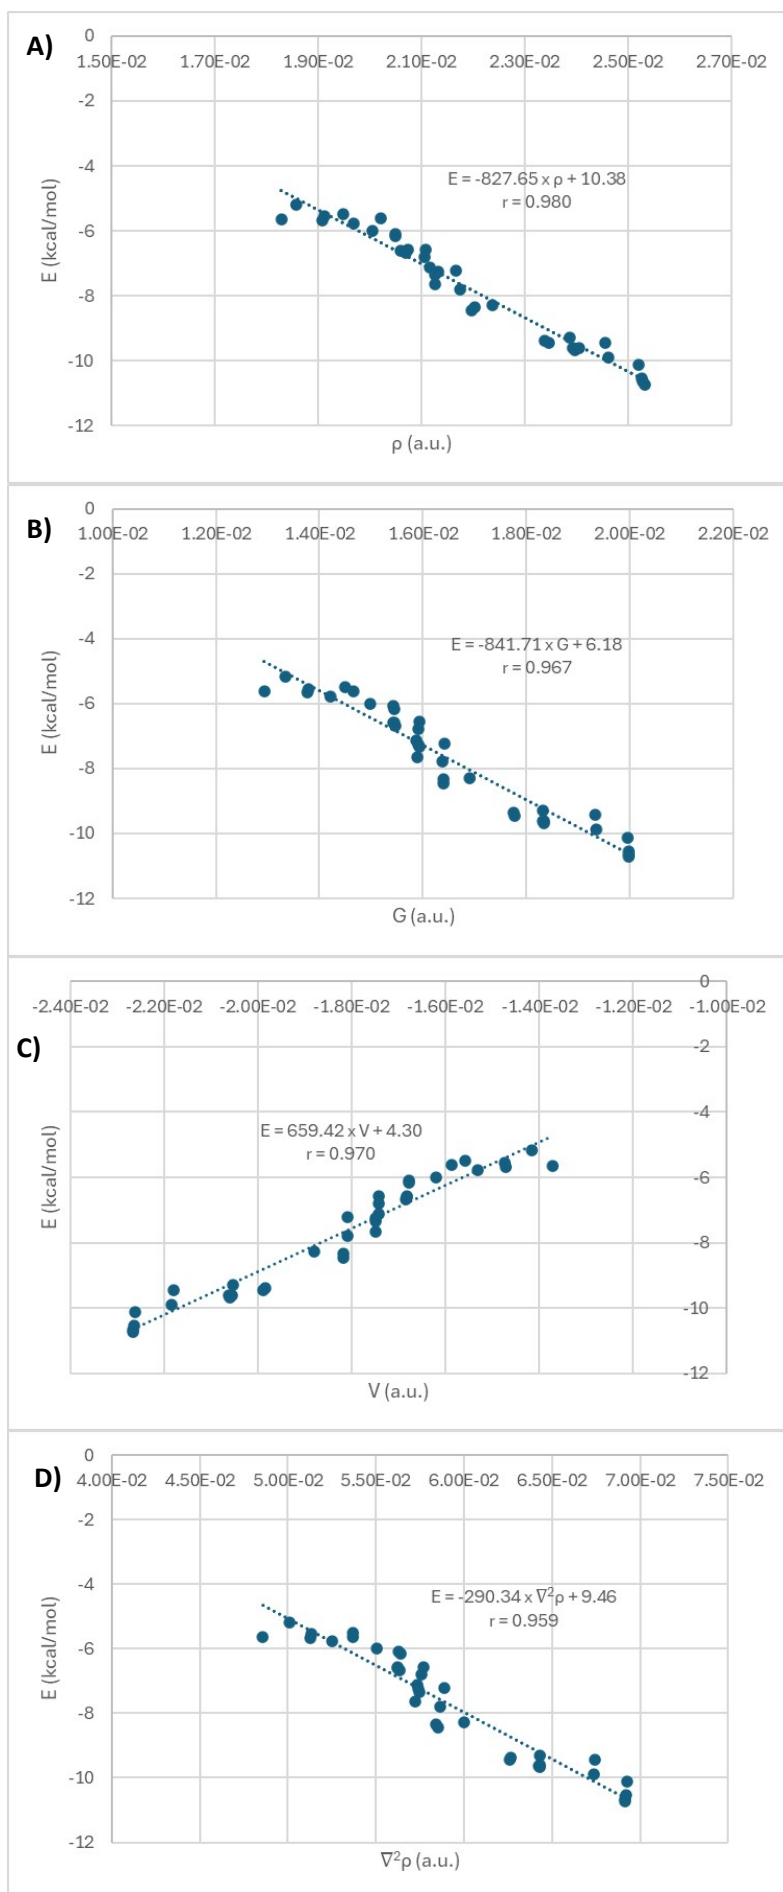

**Figure S1** Regression plots and energy equations for the argentophilic interaction at the PBE0-D4/def2-TZVP level of theory for electron density ( $\rho$ ), A); Lagrangian kinetic energy ( $G$ ), B); potential energy density ( $V$ ), C); and Laplacian of the electron density ( $\nabla^2 \rho$ ), D)

## 2. Regression plots for the aurophilic interaction at the PBE0-D4/def2-TZVP level of theory

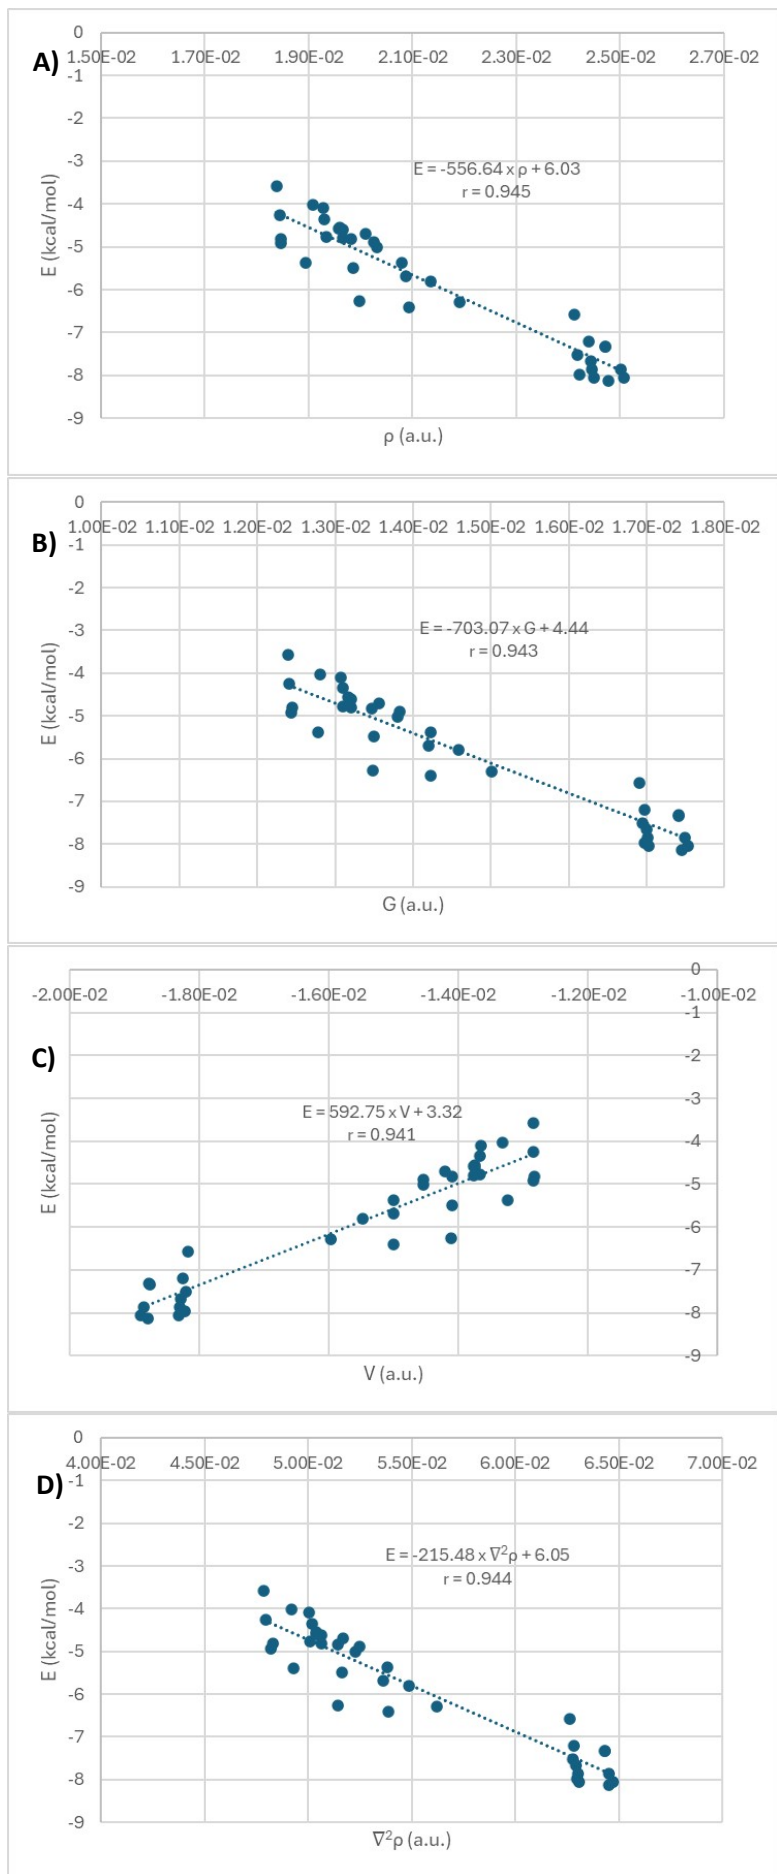

**Figure S2** Regression plots and energy equations for the aurophilic interaction at the PBE0-D4/def2-TZVP level of theory for electron density ( $\rho$ ), A); Lagrangian kinetic energy ( $G$ ), B); potential energy density ( $V$ ), C); and Laplacian of the electron density ( $\nabla^2 \rho$ ), D)

### 3. Tetrameric assemblies including the counterions in HAMMIS, UJOQAN and FAZGET

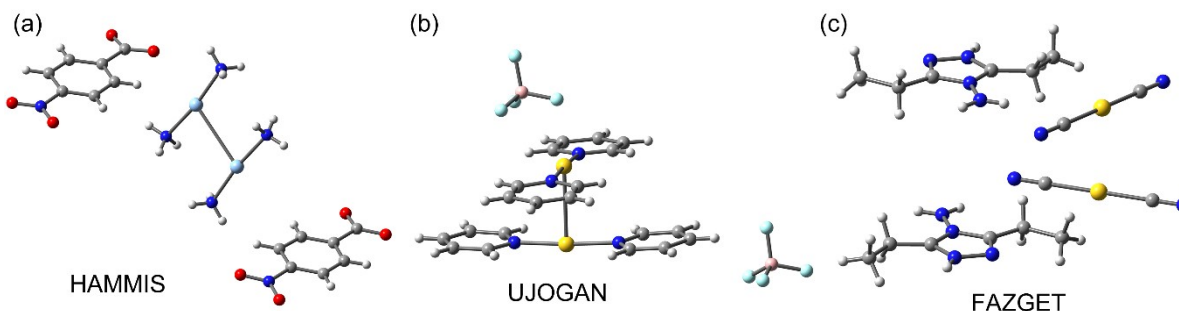

**Figure S3.** Tetrameric assemblies used to compute the interactions considering the counterions in HAMMIS (a), UJOQAN (b) and FAZGET (c)

### 4. Tables of the parameters obtained from the multivariable statistical analyses

**Table S1:** Parameters obtained from the multivariable analyses combining 2 of either  $\rho$ ,  $\nabla^2\rho$ , G, V or H variables obtained at the PBE0-D4/x2c-TZVPall level of theory.

| $R_{adj}$         | Int               | $\rho$ |       | $\nabla^2\rho$ |        | G     |        | V      |        | H      |        |
|-------------------|-------------------|--------|-------|----------------|--------|-------|--------|--------|--------|--------|--------|
| Coef <sub>1</sub> | Coef <sub>2</sub> |        |       |                |        |       |        |        |        |        |        |
| $\rho$            |                   |        |       | 0.956          | 25.24  | 0.953 | 27.21  | 0.949  | 27.85  | 0.943  | -3.650 |
|                   |                   |        |       | -3298          | 760.9  | -3281 | 2832   | -3120  | -2497  | 56.81  | 12810  |
| $\nabla^2\rho$    |                   | 0.961  | 12.19 |                |        | 0.946 | -7.950 | 0.946  | -7.950 | 0.946  | -7.950 |
|                   |                   | 167.1  | -1373 |                |        | 4878  | -19016 | 2501   | 9508   | 123.6  | 19016  |
| G                 |                   | 0.971  | 15.02 | 0.966          | -8.551 |       |        | 0.946  | -7.950 | 0.946  | -7.950 |
|                   |                   | 678.9  | -1539 | -4873          | 1311   |       |        | 20004  | 19510  | 494.3  | 19510  |
| V                 |                   | 0.971  | 17.75 | 0.966          | -8.551 | 0.966 | -8.551 |        |        | 0.946  | -7.950 |
|                   |                   | -670.0 | -1687 | 2436           | 702.0  | 5244  | 5616   |        |        | -494.3 | 20004  |
| H                 |                   | 0.968  | 19.86 | 0.966          | -8.551 | 0.966 | -8.551 | 0.966  | -8.551 |        |        |
|                   |                   | -2098  | -1340 | 4873           | 92.89  | 5244  | 371.6  | -371.6 | 5616   |        |        |

$R_{adj}$  refers to the adjusted value for Pearson's R; Int refers to the interception coefficient of the regression; Coef<sub>1</sub> refers to the coefficient of variable in the same row while Coef<sub>2</sub> refers to the variable in the same column. The light-blue cells contain the values of the double-variable plots for the Ag complexes while the yellow cells contain the values for the Au complexes. PBE0-D4/x2c-TZVPall level of theory.

**Table S2:** Parameters obtained from the multivariable analyses combining 2 of either  $\rho$ ,  $\nabla^2\rho$ , G, V or H variables obtained at the PBE0-D4/def2-TZVP level of theory.

| $R_{adj}$         | Int               | $\rho$ |        | $\nabla^2\rho$ |        | G     |        | V     |        | H      |       |
|-------------------|-------------------|--------|--------|----------------|--------|-------|--------|-------|--------|--------|-------|
| Coef <sub>1</sub> | Coef <sub>2</sub> |        |        |                |        |       |        |       |        |        |       |
| $\rho$            |                   |        |        | 0.941          | 6.041  | 0.942 | 7.496  | 0.944 | 11.57  | 0.954  | 25.00 |
|                   |                   |        |        | -375.5         | -70.21 | -1080 | 662.6  | -1714 | -1238  | -1777  | -8377 |
| $\nabla^2\rho$    |                   | 0.987  | 10.82  |                |        | 0.947 | 16.48  | 0.947 | 16.51  | 0.947  | 16.55 |
|                   |                   | 319.8  | -1714  |                |        | -1632 | 4633   | -1055 | -2317  | -476.6 | -4636 |
| G                 |                   | 0.986  | 15.32  | 0.991          | -18.91 |       |        | 0.947 | 16.58  | 0.947  | 16.58 |
|                   |                   | 1074   | -1865  | -7014          | 2147   |       |        | -8455 | -6546  | -1910  | -6546 |
| V                 |                   | 0.984  | 18.13  | 0.991          | -18.92 | 0.991 | -18.92 |       |        | 0.947  | 16.58 |
|                   |                   | -876.4 | -1913  | 3507           | 1270   | 8586  | 10158  |       |        | 1910   | -8455 |
| H                 |                   | 0.980  | -0.118 | 0.991          | -18.92 | 0.991 | -18.92 | 0.991 | -18.83 |        |       |
|                   |                   | 2468   | -153.6 | 7014           | 393.1  | 8586  | 1572   | 10158 | -1564  |        |       |

$R_{adj}$  refers to the adjusted value for Pearson's R; Int refers to the interception coefficient of the regression; Coef<sub>1</sub> refers to the coefficient of variable in the same row while Coef<sub>2</sub> refers to the variable in the same column. The light-blue cells contain the values of the double-variable plots for the Ag complexes while the yellow cells contain the values for the Au complexes. PBE0-D4/def2-TZVP level of theory.

### 5. Tables of the QTAIM parameters from the dimers plotted in figure 6

**Table S3:** QTAIM parameters obtained at the bCP Ag...Ag of the dimers of complex 4 from figure 6 at the PBE0-D4/x2c-TZVPall level of theory.

|    | $\rho$  | $\nabla^2\rho$ | G       | V        |
|----|---------|----------------|---------|----------|
| b) | 0.00151 | 0.00335        | 0.00068 | -0.00052 |
| c) | 0.00359 | 0.00732        | 0.00163 | -0.00143 |
| d) | 0.02131 | 0.06073        | 0.01596 | -0.01674 |

## 6. Coordinates of the dimers 1 to 84 at their energetic minimum (PBE0-D4/x2c-TZVPall)

1.  
Ag 0.73586603 -0.38433013 0.00000058  
N 2.80515863 -0.38433323 -0.00000232  
C 3.94608123 -0.38433513 -0.00000412  
Cl -1.52726117 -0.38432983 0.00000088  
H 5.01596113 -0.38433893 -0.00000762  
Ag 0.73587059 2.65316987 -0.00000044  
N 0.73586769 2.65316915 -2.06929304  
C 0.73586589 2.65316856 -3.21021564  
Cl 0.73587089 2.65316757 2.26312676  
H 0.73586239 2.65316599 -4.28009554

2.  
Ag 0.74433466 -0.87938554 0.00000177  
N 2.83283976 -0.87938934 -0.00000173  
C 3.97677626 -0.87939134 -0.00000363  
F 5.22244266 -0.87939474 -0.00000683  
Cl -1.52059714 -0.87938514 0.00000207  
Ag 0.74434013 2.13311446 -0.00000120  
N 0.74433663 2.13311238 -2.08850630  
C 0.74433473 2.13311133 -3.23244280  
F 0.74433153 2.13310895 -4.47810920  
Cl 0.74434043 2.13311299 2.26493060

3.  
Ag 0.77045421 1.65757624 -0.49995676  
N 2.83543331 1.65770794 -0.49992436  
C 3.97770091 1.65805404 -0.49995156  
C 5.46928201 1.65779194 -0.49999556  
F 5.91021881 2.79364064 -1.01059256  
F 5.90967951 1.53187054 0.73909664  
F 5.90923561 0.64743324 -1.22848286  
Cl -1.48922249 1.65757564 -0.50000916  
Ag 0.77061159 -1.11040298 0.72025470  
N 0.77052882 -0.27744062 2.60978172  
C 0.77041409 0.18356781 3.65488775  
C 0.77056009 0.78496114 5.01985672  
F 0.77953540 2.10232515 4.92107244  
F -0.31242633 0.39973664 5.67093133  
F 1.84473802 0.38537001 5.67677858  
Cl 0.77065978 -2.02177520 -1.34748307

4.  
Ag 0.78076180 -0.68630836 1.03097000  
N 2.84012770 -0.68631836 1.03095910  
C 3.98464260 -0.68630956 1.03096990  
N 5.40873780 -0.68633056 1.03094610  
O 5.91790740 -1.38770396 0.19836960  
O 5.91791100 0.01507934 1.86356710  
Cl -1.47534160 -0.68630276 1.03097660  
Ag 0.78076257 1.60661577 -0.92291208  
N 0.78074779 0.27092843 -2.49037093  
C 0.78076172 -0.47139428 -3.36150315  
N 0.78072998 -1.39505054 -4.44543408  
O -0.30787936 -1.72060389 -4.83697802  
O 1.86939688 -1.72998635 -4.82898762  
Cl 0.78077123 3.06990493 0.79429128

5.  
Ag 0.78342714 -0.48396373 -0.75735072  
N 2.85187824 -0.48396973 -0.75735502  
C 3.99650354 -0.48397043 -0.75735622  
C 5.43988034 -0.48397213 -0.75736412  
H 5.80845294 0.45262617 -1.17835482  
H 5.80845444 -0.58768583 0.26425608  
H 5.80844544 -1.31686773 -1.35798672  
Cl -1.48377986 -0.48396013 -0.75734942  
Ag 0.78343794 1.94405873 1.06778302  
N 0.78343811 3.18692288 -0.58563122  
C 0.78343757 3.87469277 -1.50058458  
C 0.78343228 4.74196959 -2.65434691  
H -0.11585551 5.35968011 -2.65110543  
H 1.66238336 5.38784897 -2.62993274  
H 0.80378110 4.14276496 -3.56585256  
Cl 0.78343682 0.58176516 2.88006992

6.  
Ag 0.80166312 0.50940667 1.10336733  
N 2.87065552 0.50940357 1.10336313  
C 4.02191782 0.50939587 1.10336123  
N 5.33076092 0.50943417 1.10335923  
H 5.83850212 1.37660007 1.10335823

|    |             |             |             |
|----|-------------|-------------|-------------|
| H  | 5.83851222  | -0.35784773 | 1.10335113  |
| Cl | -1.46786008 | 0.50940757  | 1.10336823  |
| Ag | 0.80165697  | 0.54836802  | -1.93388279 |
| N  | 0.80165382  | -1.52045417 | -1.96042133 |
| C  | 0.80164609  | -2.67162177 | -1.97518783 |
| N  | 0.80168436  | -3.98035720 | -1.99197595 |
| H  | 1.66877889  | -4.48791396 | -2.00961241 |
| H  | -0.06552627 | -4.48820933 | -1.98737057 |
| Cl | 0.80165788  | 2.81770456  | -1.90477576 |

**7.**

|    |             |             |             |
|----|-------------|-------------|-------------|
| Ag | 0.76789195  | -0.59786394 | 1.39734518  |
| N  | 2.84736385  | -0.59086954 | 1.40385968  |
| C  | 3.99416985  | -0.56137514 | 1.43121818  |
| O  | 5.26845465  | -0.59476284 | 1.40018648  |
| H  | 5.66330265  | 0.05362456  | 2.00207958  |
| Cl | -1.49967315 | -0.58757024 | 1.40687558  |
| Ag | 0.76899356  | 1.28198377  | -0.97263296 |
| N  | 0.77852178  | -0.34720966 | -2.26489173 |
| C  | 0.81863018  | -1.24737099 | -2.97544314 |
| O  | 0.77318934  | -2.24321266 | -3.77049908 |
| H  | 1.65519129  | -2.59534050 | -3.96198021 |
| Cl | 0.78298016  | 3.05735757  | 0.43800538  |

**8.**

|    |             |             |             |
|----|-------------|-------------|-------------|
| Ag | 1.16991377  | -2.34199847 | -0.07444816 |
| N  | 3.25648267  | -2.34200167 | -0.07445116 |
| C  | 4.39739597  | -2.34200347 | -0.07445286 |
| H  | 5.46735137  | -2.34200717 | -0.07445626 |
| Br | -1.21984763 | -2.34199817 | -0.07444786 |
| Ag | 1.16991816  | -2.31735405 | 2.93795103  |
| N  | 1.16992133  | -0.23087265 | 2.91884297  |
| C  | 1.16992312  | 0.90999281  | 2.90839483  |
| H  | 1.16992679  | 1.97990333  | 2.89859467  |
| Br | 1.16991787  | -4.70701528 | 2.95983246  |

**9.**

|    |             |             |             |
|----|-------------|-------------|-------------|
| Ag | -0.49011192 | -1.22910374 | 0.00000007  |
| N  | 1.61544078  | -1.22910774 | -0.00000373 |
| C  | 2.75950258  | -1.22910964 | -0.00000553 |
| Br | -2.88132872 | -1.22910334 | 0.00000037  |
| F  | 4.00507948  | -1.22911274 | -0.00000843 |
| Ag | -0.49010627 | 1.75839626  | -0.00000123 |
| N  | -0.49011007 | 1.75839536  | -2.10555393 |
| C  | -0.49011187 | 1.75839515  | -3.24961573 |
| Br | -0.49010597 | 1.75839313  | 2.39121557  |
| F  | -0.49011477 | 1.75839389  | -4.49519263 |

**10.**

|    |             |             |             |
|----|-------------|-------------|-------------|
| Ag | 0.45572475  | -1.11187529 | -0.12810244 |
| N  | 2.53862025  | -1.11192399 | -0.12820814 |
| C  | 3.68086415  | -1.11190409 | -0.12849894 |
| Br | -1.93053975 | -1.11180709 | -0.12812074 |
| C  | 5.17269055  | -1.11186649 | -0.12832804 |
| F  | 5.61319815  | -1.94706559 | -1.05216884 |
| F  | 5.61244355  | -1.49445349 | 1.05714276  |
| F  | 5.61292785  | 0.10595871  | -0.38953094 |
| Ag | 0.45575975  | 1.81489895  | -0.78688356 |
| N  | 0.45564594  | 1.35750820  | -2.81893852 |
| C  | 0.45536661  | 1.10677287  | -3.93332307 |
| Br | 0.45575688  | 2.33894929  | 1.54112621  |
| C  | 0.45554159  | 0.77919333  | -5.38873973 |
| F  | -0.62916116 | 0.08546966  | -5.68412711 |
| F  | 1.52805564  | 0.06451155  | -5.67863647 |
| F  | 0.46815557  | 1.89758649  | -6.09171319 |

**11.**

|    |             |             |             |
|----|-------------|-------------|-------------|
| Ag | 0.05159019  | -0.77593114 | -0.23786783 |
| N  | 2.12838489  | -0.77590374 | -0.23787223 |
| C  | 3.27294179  | -0.77593934 | -0.23787373 |
| Br | -2.33082431 | -0.77595644 | -0.23786673 |
| N  | 4.69692949  | -0.77594794 | -0.23787833 |
| O  | 5.20621899  | -1.86468394 | -0.23788463 |
| O  | 5.20622609  | 0.31277746  | -0.23787563 |
| Ag | 0.05159690  | -0.80403926 | 2.76200049  |
| N  | 0.05156955  | 1.27266428  | 2.78145875  |
| C  | 0.05160516  | 2.41717093  | 2.79218393  |
| Br | 0.05162219  | -3.18634915 | 2.73967476  |
| N  | 0.05161380  | 3.84109614  | 2.80552447  |
| O  | 1.14030210  | 4.35026776  | 2.82048892  |
| O  | -1.03706386 | 4.35046592  | 2.80010232  |

**12.**

|    |             |             |             |
|----|-------------|-------------|-------------|
| Ag | -0.11177950 | -0.34318612 | -0.05772892 |
| N  | 1.97166470  | -0.34318982 | -0.05773222 |
| C  | 3.11632980  | -0.34319232 | -0.05773552 |

|    |             |             |             |
|----|-------------|-------------|-------------|
| Br | -2.50553310 | -0.34318602 | -0.05772972 |
| C  | 4.55978830  | -0.34319822 | -0.05774202 |
| H  | 4.92819970  | 0.66084568  | -0.27319982 |
| H  | 4.92819770  | -0.65862972 | 0.91951568  |
| H  | 4.92818960  | -1.03181422 | -0.81954072 |
| Ag | -0.11177524 | 2.60348825  | -0.68404065 |
| N  | -0.11177924 | 2.17033122  | -2.72195986 |
| C  | -0.11178299 | 1.93235026  | -3.84161305 |
| Br | -0.11177600 | 3.10115691  | 1.65740809  |
| C  | -0.11179057 | 1.63224668  | -5.25353028 |
| H  | -0.11379394 | 2.56011388  | -5.82738708 |
| H  | 0.77853295  | 1.05511816  | -5.50750239 |
| H  | -1.00011030 | 1.05172539  | -5.50677299 |

**13.**

|    |             |             |             |
|----|-------------|-------------|-------------|
| Ag | -0.18056846 | -0.59293706 | -0.44774720 |
| N  | 1.90270254  | -0.59294176 | -0.44775160 |
| C  | 3.05406314  | -0.59293986 | -0.44775350 |
| Br | -2.57664126 | -0.59293596 | -0.44774640 |
| N  | 4.36284624  | -0.59298246 | -0.44775530 |
| H  | 4.87053964  | 0.27433314  | -0.44775640 |
| H  | 4.87051584  | -1.46020056 | -0.44776350 |
| Ag | -0.18056199 | -0.56629854 | 2.57713551  |
| N  | -0.18055733 | 1.51689169  | 2.55878998  |
| C  | -0.18055925 | 2.66820765  | 2.54865154  |
| Br | -0.18056309 | -2.96227847 | 2.59823131  |
| N  | -0.18051667 | 3.97694001  | 2.53712685  |
| H  | -1.04779863 | 4.48468098  | 2.54029526  |
| H  | 0.68666772  | 4.48452261  | 2.52501076  |

**14.**

|    |             |             |             |
|----|-------------|-------------|-------------|
| Ag | -0.07751117 | -0.09962542 | 0.28030044  |
| N  | 2.01692093  | -0.09238952 | 0.28702554  |
| C  | 3.16389573  | -0.06300852 | 0.31422024  |
| Br | -2.47130607 | -0.08896022 | 0.29015284  |
| O  | 4.43807633  | -0.09614892 | 0.28348024  |
| H  | 4.83294823  | 0.55301448  | 0.88483134  |
| Ag | -0.07646137 | 1.78258873  | -2.07181033 |
| N  | -0.06660985 | 0.14728804  | -3.38041187 |
| C  | -0.02667922 | -0.74980774 | -4.09509969 |
| Br | -0.06197902 | 3.65045715  | -0.57470555 |
| O  | -0.07175979 | -1.74232020 | -4.89414049 |
| H  | 0.81079914  | -2.09069493 | -5.09082513 |

**15.**

|    |             |             |             |
|----|-------------|-------------|-------------|
| Ag | 1.14979180  | -2.69573824 | 0.00000047  |
| N  | 3.26054490  | -2.69574174 | -0.00000283 |
| C  | 4.40150220  | -2.69574334 | -0.00000433 |
| H  | 5.47154850  | -2.69574684 | -0.00000763 |
| I  | -1.40209100 | -2.69573794 | 0.00000067  |
| Ag | 1.14979679  | 0.30426176  | -0.00000011 |
| N  | 1.14979349  | 0.30426136  | -2.11075321 |
| C  | 1.14979199  | 0.30426143  | -3.25171051 |
| H  | 1.14978869  | 0.30425950  | -4.32175681 |
| I  | 1.14979699  | 0.30425832  | 2.55188269  |

**16.**

|    |             |             |             |
|----|-------------|-------------|-------------|
| Ag | 0.22355937  | -1.33698151 | 0.00000004  |
| N  | 2.35339427  | -1.33698571 | -0.00000396 |
| C  | 3.49768207  | -1.33698741 | -0.00000566 |
| I  | -2.32916333 | -1.33698101 | 0.00000044  |
| F  | 4.74334987  | -1.33699031 | -0.00000826 |
| Ag | 0.22356521  | 1.63801849  | -0.00000093 |
| N  | 0.22356121  | 1.63801777  | -2.12983583 |
| C  | 0.22355951  | 1.63801794  | -3.27412363 |
| I  | 0.22356561  | 1.63801481  | 2.55272177  |
| F  | 0.22355691  | 1.63801708  | -4.51979143 |

**17.**

|    |             |             |             |
|----|-------------|-------------|-------------|
| Ag | 0.34394577  | 0.80757081  | -0.08504746 |
| N  | 2.45280017  | 0.80749801  | -0.08510266 |
| C  | 3.59507977  | 0.80721761  | -0.08521216 |
| I  | -2.20478243 | 0.80754741  | -0.08502426 |
| C  | 5.08701327  | 0.80734811  | -0.08514126 |
| F  | 5.52757777  | -0.09015919 | -0.94852526 |
| F  | 5.52699827  | 0.50848481  | 1.12408574  |
| F  | 5.52673697  | 2.00412711  | -0.43079376 |
| Ag | 0.34402247  | 3.67224500  | -0.93286704 |
| N  | 0.34394888  | 3.07377535  | -2.95501959 |
| C  | 0.34376430  | 2.74940909  | -4.05027722 |
| I  | 0.34403807  | 4.39545541  | 1.51110148  |
| C  | 0.34386932  | 2.32615221  | -5.48091316 |
| F  | -0.73873665 | 1.61087774  | -5.72869350 |
| F  | 1.41855080  | 1.59741845  | -5.72410617 |
| F  | 0.35209240  | 3.39583763  | -6.25603770 |

|            |             |             |             |
|------------|-------------|-------------|-------------|
| <b>18.</b> |             |             |             |
| Ag         | -0.37833231 | -0.07159915 | -0.18447660 |
| N          | 1.72232949  | -0.07158865 | -0.18448120 |
| C          | 2.86712739  | -0.07162545 | -0.18448270 |
| I          | -2.92268471 | -0.07160485 | -0.18447540 |
| N          | 4.29025139  | -0.07164765 | -0.18448700 |
| O          | 4.80010559  | -1.16064605 | -0.18449330 |
| O          | 4.80003989  | 1.01741575  | -0.18448430 |
| Ag         | -0.37832563 | -0.09569131 | 2.80292625  |
| N          | -0.37833609 | 2.00490218  | 2.81986669  |
| C          | -0.37829928 | 3.14966284  | 2.82910007  |
| I          | -0.37831994 | -2.63996094 | 2.78240332  |
| N          | -0.37827705 | 4.57274057  | 2.84057567  |
| O          | 0.71068601  | 5.08250742  | 2.85346148  |
| O          | -1.46730508 | 5.08258329  | 2.83591076  |

|            |             |             |             |
|------------|-------------|-------------|-------------|
| <b>19.</b> |             |             |             |
| Ag         | 0.11177002  | -0.26846280 | 0.08018578  |
| N          | 2.21689772  | -0.26846570 | 0.08018278  |
| C          | 3.36166062  | -0.26847030 | 0.08017908  |
| I          | -2.44381358 | -0.26846450 | 0.08018458  |
| C          | 4.80518222  | -0.26847460 | 0.08017448  |
| H          | 5.17359102  | 0.71807180  | -0.20481182 |
| H          | 5.17359162  | -0.51494760 | 1.07704228  |
| H          | 5.17358352  | -1.00855750 | -0.63171352 |
| Ag         | 0.11177283  | 2.61923555  | -0.73295519 |
| N          | 0.11176916  | 2.04864703  | -2.75927978 |
| C          | 0.11176435  | 1.73836023  | -3.86118913 |
| I          | 0.11177122  | 3.31191522  | 1.72696400  |
| C          | 0.11175876  | 1.34709657  | -5.25067369 |
| H          | 0.10484200  | 2.23566250  | -5.88361822 |
| H          | 1.00450368  | 0.75879075  | -5.46775110 |
| H          | -0.77407824 | 0.74726392  | -5.46449688 |

|            |             |             |             |
|------------|-------------|-------------|-------------|
| <b>20.</b> |             |             |             |
| Ag         | 0.01719569  | -0.47647672 | -0.54663323 |
| N          | 2.12089709  | -0.47648152 | -0.54663783 |
| C          | 3.27243609  | -0.47647922 | -0.54663953 |
| I          | -2.54042401 | -0.47647602 | -0.54663243 |
| N          | 4.58127789  | -0.47650682 | -0.54664123 |
| H          | 5.08900209  | 0.39077018  | -0.54664243 |
| H          | 5.08898609  | -1.34373272 | -0.54664953 |
| Ag         | 0.01720229  | -0.48054046 | 2.46586403  |
| N          | 0.01720709  | 1.62315903  | 2.46870185  |
| C          | 0.01720480  | 2.77469698  | 2.47025604  |
| I          | 0.01720159  | -3.03815782 | 2.46240911  |
| N          | 0.01723240  | 4.08353759  | 2.47202281  |
| H          | -0.85004381 | 4.59126290  | 2.47153959  |
| H          | 0.88445752  | 4.59124376  | 2.47386846  |

|            |             |             |             |
|------------|-------------|-------------|-------------|
| <b>21.</b> |             |             |             |
| Ag         | -0.31856891 | -0.76259561 | 0.45921488  |
| N          | 1.79766789  | -0.75418451 | 0.46703608  |
| C          | 2.94486169  | -0.72584621 | 0.49326648  |
| I          | -2.87426961 | -0.75097191 | 0.46995098  |
| O          | 4.21899489  | -0.75840931 | 0.46304288  |
| H          | 4.61204139  | -0.10885871 | 1.06497068  |
| Ag         | -0.31628399 | 0.95175867  | -2.00269173 |
| N          | -0.30491211 | -0.78490641 | -3.21201186 |
| C          | -0.26667069 | -1.72890185 | -3.86389752 |
| I          | -0.30061314 | 3.04669803  | -0.53884748 |
| O          | -0.31065899 | -2.77038350 | -4.59790722 |
| H          | 0.56626454  | -3.16337974 | -4.72151020 |

|            |             |             |             |
|------------|-------------|-------------|-------------|
| <b>22.</b> |             |             |             |
| Ag         | 0.70834879  | -0.57045602 | -0.01676630 |
| C          | -1.29652421 | -0.57045542 | -0.01676580 |
| N          | -2.45269311 | -0.57045542 | -0.01676570 |
| N          | 2.79171459  | -0.57045922 | -0.01676930 |
| C          | 3.93187499  | -0.57046072 | -0.01677070 |
| H          | 5.00224239  | -0.57046372 | -0.01677350 |
| Ag         | 0.70835359  | 2.50418293  | 0.03035373  |
| C          | 0.70835408  | 2.47345855  | 2.03499130  |
| N          | 0.70835418  | 2.45574008  | 3.19102442  |
| N          | 0.70835064  | 2.53610759  | -2.05276745 |
| C          | 0.70834926  | 2.55357921  | -3.19279398 |
| H          | 0.70834650  | 2.56997971  | -4.26303572 |

|            |             |            |             |
|------------|-------------|------------|-------------|
| <b>23.</b> |             |            |             |
| Ag         | 0.70228546  | 0.17038301 | 0.00000025  |
| C          | -1.30211244 | 0.17038371 | 0.00000085  |
| N          | -2.45826294 | 0.17038371 | 0.00000085  |
| N          | 2.82118836  | 0.19133507 | -0.00000350 |
| C          | 3.96465816  | 0.19133347 | -0.00000500 |



|    |            |            |             |
|----|------------|------------|-------------|
| F  | 5.20857086 | 0.19133117 | -0.00000720 |
| Ag | 0.67200442 | 3.23273330 | -0.00000155 |
| C  | 0.67131874 | 3.30214161 | 2.00319414  |
| N  | 0.67092288 | 3.34217639 | 3.15865120  |
| N  | 0.67271922 | 3.16006979 | -2.09704949 |
| C  | 0.67310925 | 3.12047249 | -3.23983342 |
| F  | 0.67353299 | 3.07739638 | -4.48299997 |

**24.**

|    |            |             |             |
|----|------------|-------------|-------------|
| Ag | 4.03570315 | 0.02893779  | 0.04968015  |
| C  | 2.03104845 | 0.02892468  | 0.04957826  |
| N  | 0.87501195 | 0.02891461  | 0.04953319  |
| N  | 6.11840285 | 0.02909809  | 0.04971895  |
| C  | 7.25974265 | 0.02951879  | 0.04968795  |
| C  | 8.75410945 | 0.02919089  | 0.04962885  |
| F  | 9.19176805 | 1.16504439  | -0.46101435 |
| F  | 9.19113285 | -0.09681061 | 1.28879625  |
| F  | 9.19056265 | -0.98132091 | -0.67892945 |
| Ag | 4.03551235 | 2.81074277  | -1.20094411 |
| C  | 4.03541404 | 3.63273286  | 0.62743571  |
| N  | 4.03536881 | 4.10674771  | 1.68182193  |
| N  | 4.03559894 | 1.95692502  | -3.10058442 |
| C  | 4.03559410 | 1.48932813  | -4.14174237 |
| C  | 4.03556932 | 0.87629772  | -5.50457983 |
| F  | 3.52487446 | 1.73279712  | -6.36948689 |
| F  | 5.27475359 | 0.58225661  | -5.85151476 |
| F  | 3.30707593 | -0.22436374 | -5.48831859 |

**25.**

|    |             |             |             |
|----|-------------|-------------|-------------|
| Ag | 0.74580695  | 0.33244808  | 0.16117131  |
| C  | -1.25853165 | 0.33245358  | 0.16117761  |
| N  | -2.41456455 | 0.33245388  | 0.16117791  |
| N  | 2.82796255  | 0.33243238  | 0.16115341  |
| C  | 3.97109595  | 0.33244278  | 0.16116621  |
| N  | 5.40033795  | 0.33244338  | 0.16116791  |
| O  | 5.90589175  | -0.36890542 | -0.67137939 |
| O  | 5.90591235  | 1.03379158  | 0.99371561  |
| Ag | 0.74580762  | 2.66398909  | -1.80514924 |
| C  | 0.74581598  | 3.95617646  | -0.27295310 |
| N  | 0.74581641  | 4.70146523  | 0.61076445  |
| N  | 0.74578382  | 1.32163323  | -3.39683159 |
| C  | 0.74580031  | 0.58466050  | -4.27068808 |
| N  | 0.74580199  | -0.33676529 | -5.36325716 |
| O  | -0.34278645 | -0.66223415 | -5.75010988 |
| O  | 1.83439035  | -0.66316637 | -5.74935064 |

**26.**

|    |             |             |             |
|----|-------------|-------------|-------------|
| Ag | 0.75032791  | 0.14087902  | -0.00000027 |
| C  | -1.25479879 | 0.14088312  | 0.00000123  |
| N  | -2.41121569 | 0.14088372  | 0.00000133  |
| N  | 2.82903331  | 0.14087342  | -0.00000417 |
| C  | 3.97328981  | 0.14087362  | -0.00000607 |
| C  | 5.41620271  | 0.14087132  | -0.00001117 |
| H  | 5.78385061  | 1.07776882  | -0.42113717 |
| H  | 5.78385151  | 0.03712642  | 1.02193063  |
| H  | 5.78384401  | -0.69228698 | -0.60082597 |
| Ag | 0.75033617  | 3.21587902  | -0.00000191 |
| C  | 0.75033728  | 3.07539410  | 2.00019736  |
| N  | 0.75033715  | 2.99437046  | 3.15377233  |
| N  | 0.75033267  | 3.36151772  | -2.07359914 |
| C  | 0.75033099  | 3.44169014  | -3.21504355 |
| C  | 0.75032617  | 3.54278540  | -4.65441055 |
| H  | 0.32920337  | 4.50314103  | -4.95551128 |
| H  | 1.77226770  | 3.46505131  | -5.02842475 |
| H  | 0.14950866  | 2.73743540  | -5.07952347 |

**27.**

|    |             |             |             |
|----|-------------|-------------|-------------|
| Ag | 0.78065374  | 0.59368499  | 0.56312669  |
| C  | -1.22426762 | 0.59330225  | 0.56314934  |
| N  | -2.38080770 | 0.59308065  | 0.56316182  |
| N  | 2.85760101  | 0.59407859  | 0.56310021  |
| C  | 4.00870049  | 0.59429873  | 0.56308649  |
| N  | 5.31620176  | 0.59453464  | 0.56307139  |
| H  | 5.82380932  | 1.46207949  | 0.55104908  |
| H  | 5.82413059  | -0.27279226 | 0.57507289  |
| Ag | 0.73805693  | 0.40128941  | -2.50555290 |
| C  | 0.73767349  | 2.40228197  | -2.63100595 |
| N  | 0.73745151  | 3.55655567  | -2.70337424 |
| N  | 0.73845142  | -1.67158810 | -2.37559615 |
| C  | 0.73867200  | -2.82043195 | -2.30356961 |
| N  | 0.73890840  | -4.12537113 | -2.22175691 |
| H  | 1.60600817  | -4.63008941 | -2.15977720 |
| H  | -0.12797263 | -4.63419971 | -2.22020004 |

**28.**

|    |             |             |             |
|----|-------------|-------------|-------------|
| Ag | 0.74093523  | 0.34337508  | 0.19078138  |
| C  | -1.26357027 | 0.34920488  | 0.19616348  |
| N  | -2.41991077 | 0.35352818  | 0.20016308  |
| N  | 2.82824463  | 0.35530168  | 0.20187588  |
| C  | 3.97503733  | 0.37978848  | 0.22456968  |
| O  | 5.24721693  | 0.34408208  | 0.19136948  |
| H  | 5.64621353  | 0.99145298  | 0.79233628  |
| Ag | 0.74163843  | 2.36237359  | -2.11194543 |
| C  | 0.74957000  | 3.86914410  | -0.78994506 |
| N  | 0.75545743  | 4.73832944  | -0.02729165 |
| N  | 0.75792039  | 0.79290057  | -3.48803235 |
| C  | 0.79129335  | -0.06982366 | -4.24357272 |
| O  | 0.74255799  | -1.02525049 | -5.08357425 |
| H  | 1.62551369  | -1.34187531 | -5.32767756 |

**29.**

|    |             |             |             |
|----|-------------|-------------|-------------|
| Ag | 0.70313311  | 0.52322960  | -0.01249502 |
| N  | 2.83314291  | 0.52323620  | -0.01244262 |
| C  | 3.51738911  | -0.62332590 | 0.02774968  |
| C  | 3.51733751  | 1.67002510  | -0.05264982 |
| C  | 4.89879131  | -0.66721420 | 0.02920298  |
| H  | 2.93073301  | -1.53304970 | 0.05969648  |
| C  | 4.89875351  | 1.71379540  | -0.05425942 |
| H  | 2.93064101  | 2.57962870  | -0.08450602 |
| C  | 5.60474031  | 0.52341940  | -0.01263162 |
| H  | 5.40369701  | -1.62388210 | 0.06277018  |
| H  | 5.40359891  | 2.67060690  | -0.08778472 |
| Cl | -1.56508719 | 0.52316380  | -0.01249652 |
| H  | 6.68812151  | 0.52339220  | -0.01278642 |
| Ag | 0.70306089  | 0.61287549  | 2.91113092  |
| N  | 0.70305590  | 2.74188469  | 2.84585000  |
| C  | 1.85031108  | 3.42596419  | 2.82992154  |
| C  | -0.44442643 | 3.42560186  | 2.81979654  |
| C  | 1.89422331  | 4.80671974  | 2.78765856  |
| H  | 2.76058654  | 2.83970905  | 2.85198693  |
| C  | -0.48822549 | 4.80635964  | 2.77715626  |
| H  | -1.35457896 | 2.83905915  | 2.83380806  |
| C  | 0.70286700  | 5.51217236  | 2.76065400  |
| H  | 2.85147047  | 5.311151838 | 2.77642459  |
| H  | -1.44561490 | 5.31083840  | 2.75746454  |
| Cl | 0.70312662  | -1.65427767 | 2.98070018  |
| H  | 0.70288945  | 6.59503904  | 2.72726813  |

**30.**

|    |             |             |             |
|----|-------------|-------------|-------------|
| Ag | 0.70594776  | 0.48272433  | -1.50854761 |
| N  | 2.83557766  | 0.48278343  | -1.50849081 |
| C  | 3.52122886  | -0.66332007 | -1.46829451 |
| C  | 3.52118366  | 1.62895113  | -1.54865891 |
| C  | 4.90033516  | -0.71674777 | -1.46651081 |
| H  | 2.93800946  | -1.57518247 | -1.43629911 |
| C  | 4.90028416  | 1.68238983  | -1.55060351 |
| H  | 2.93793276  | 2.54078413  | -1.58062011 |
| C  | 5.58298606  | 0.48285253  | -1.50873301 |
| H  | 5.42814126  | -1.66005167 | -1.43338521 |
| H  | 5.42802966  | 2.62575403  | -1.58363371 |
| F  | 6.90596616  | 0.48283953  | -1.50911091 |
| Cl | -1.56009714 | 0.48266573  | -1.50853511 |
| Ag | 0.70586760  | 0.56196668  | 1.41537880  |
| N  | 0.70581006  | 2.69081492  | 1.35768413  |
| C  | 1.85258162  | 3.37646245  | 1.34825014  |
| C  | -0.44102491 | 3.37592108  | 1.32996117  |
| C  | 1.90603802  | 4.75507068  | 1.31118737  |
| H  | 2.76497593  | 2.79365565  | 1.37136870  |
| C  | -0.49449667 | 4.75450087  | 1.29206416  |
| H  | -1.35338891 | 2.79268749  | 1.33850927  |
| C  | 0.70573443  | 5.43720636  | 1.28293753  |
| H  | 2.84989290  | 5.28288833  | 1.30445499  |
| H  | -1.43840924 | 5.28184924  | 1.27026820  |
| F  | 0.70573720  | 6.75968963  | 1.24668191  |
| Cl | 0.70592651  | -1.70324451 | 1.47684215  |

**31.**

|    |            |             |             |
|----|------------|-------------|-------------|
| Ag | 0.70710770 | 0.51954190  | -0.08337466 |
| N  | 2.84052190 | 0.52014990  | -0.08756946 |
| C  | 3.52407510 | -0.62583160 | -0.04093926 |
| C  | 3.52321350 | 1.66700430  | -0.12068976 |
| C  | 4.90470310 | -0.67100730 | -0.02324746 |
| H  | 2.93976210 | -1.53700240 | -0.01428496 |
| C  | 4.90412020 | 1.71443470  | -0.10628556 |
| H  | 2.93825560 | 2.57732340  | -0.15737476 |
| C  | 5.60508670 | 0.52231880  | -0.05482566 |
| H  | 5.41656480 | -1.62291800 | 0.02296094  |
| H  | 5.41506950 | 2.66764670  | -0.12652866 |
| C  | 7.11240480 | 0.51998370  | -0.07402366 |
| F  | 7.61028400 | 1.62758820  | 0.47678814  |

|    |             |             |             |
|----|-------------|-------------|-------------|
| F  | 7.56645710  | 0.45424860  | -1.33019546 |
| F  | 7.60685750  | -0.52701820 | 0.58793634  |
| Cl | -1.55829510 | 0.51949950  | -0.07250806 |
| Ag | 0.71281765  | 0.64560870  | 2.83890177  |
| N  | 0.71202942  | 2.77704459  | 2.74695333  |
| C  | 1.85895074  | 3.45980691  | 2.71378627  |
| C  | -0.43515008 | 3.45992685  | 2.73742422  |
| C  | 1.90488285  | 4.83990887  | 2.67259962  |
| H  | 2.77039500  | 2.87539194  | 2.72342172  |
| C  | -0.48187816 | 4.84034415  | 2.69711298  |
| H  | -1.34619986 | 2.87564737  | 2.76585325  |
| C  | 0.71134837  | 5.54061786  | 2.66597350  |
| H  | 2.85791075  | 5.35146828  | 2.65481202  |
| H  | -1.43503240 | 5.35179921  | 2.69878802  |
| C  | 0.71282197  | 7.04586575  | 2.58468082  |
| F  | -0.36884201 | 7.56802321  | 3.16383510  |
| F  | 0.72190145  | 7.44777328  | 1.30920441  |
| F  | 1.78858410  | 7.56516627  | 3.17793481  |
| Cl | 0.71334091  | -1.61742869 | 2.94296630  |

**32.**

|    |             |             |             |
|----|-------------|-------------|-------------|
| Ag | 0.71085702  | 0.57700564  | 1.31418573  |
| N  | 2.84520202  | 0.57708874  | 1.31426543  |
| C  | 3.52541702  | -0.57178066 | 1.35459413  |
| C  | 3.52544272  | 1.72587064  | 1.27397073  |
| C  | 4.90683712  | -0.62335276 | 1.35623963  |
| H  | 2.93956622  | -1.48165196 | 1.38656953  |
| C  | 4.90687952  | 1.77750114  | 1.27204833  |
| H  | 2.93959302  | 2.63578044  | 1.24204813  |
| C  | 5.58288122  | 0.57700134  | 1.31392913  |
| H  | 5.44107242  | -1.56225616 | 1.38915363  |
| H  | 5.44107842  | 2.71637224  | 1.23909653  |
| N  | 7.05875112  | 0.57684874  | 1.31317213  |
| O  | 7.60491492  | 1.65368024  | 1.27603403  |
| O  | 7.60467182  | -0.50003636 | 1.34961713  |
| Cl | -1.55263538 | 0.57692144  | 1.31418973  |
| Ag | 0.71097080  | 0.45831134  | -1.60840501 |
| N  | 0.71105060  | -1.67427565 | -1.52179489 |
| C  | -0.43850876 | -2.35418967 | -1.50058295 |
| C  | 1.86052116  | -2.35369767 | -1.48782303 |
| C  | -0.49010514 | -3.73449237 | -1.44502989 |
| H  | -1.34892797 | -1.76902353 | -1.52933770 |
| C  | 1.91218713  | -3.73399164 | -1.43164286 |
| H  | 2.77097668  | -1.76812436 | -1.50651521 |
| C  | 0.71097693  | -4.40971797 | -1.41114760 |
| H  | -1.42957061 | -4.26850130 | -1.42861711 |
| H  | 2.85162186  | -4.26754014 | -1.40477995 |
| N  | 0.71085521  | -5.88440547 | -1.35207720 |
| O  | 1.78830653  | -6.42985143 | -1.32330956 |
| O  | -0.36662151 | -6.43017438 | -1.33726545 |
| Cl | 0.71088650  | 2.71994295  | -1.70016730 |

**33.**

|    |             |             |             |
|----|-------------|-------------|-------------|
| Ag | 0.69989848  | 0.45250729  | -1.09296624 |
| N  | 2.82856288  | 0.45255359  | -1.09639934 |
| C  | 3.51938888  | -0.68994171 | -1.05083294 |
| C  | 3.51912218  | 1.59546029  | -1.13095344 |
| C  | 4.89860748  | -0.72998581 | -1.03695894 |
| H  | 2.93792468  | -1.60329601 | -1.02153454 |
| C  | 4.89844828  | 1.63663989  | -1.11993004 |
| H  | 2.93752428  | 2.50856709  | -1.16568354 |
| C  | 5.62772408  | 0.45365149  | -1.07283724 |
| H  | 5.40040088  | -1.68921381 | -0.99419104 |
| H  | 5.40007688  | 2.59659059  | -1.14445854 |
| C  | 7.12037168  | 0.45301219  | -1.08330904 |
| H  | 7.48938428  | 0.40079489  | -2.11209974 |
| H  | 7.52190298  | 1.36291659  | -0.63616424 |
| H  | 7.52129078  | -0.40796961 | -0.54726234 |
| Cl | -1.57011222 | 0.45277509  | -1.08498524 |
| Ag | 0.70462189  | 0.64348568  | 1.83831525  |
| N  | 0.70435249  | 2.76764935  | 1.69992248  |
| C  | 1.84734711  | 3.45513893  | 1.62553336  |
| C  | -0.43831542 | 3.45946364  | 1.69771191  |
| C  | 1.88823008  | 4.83229051  | 1.54923100  |
| H  | 2.76062273  | 2.87283795  | 1.63085443  |
| C  | -0.47866562 | 4.83688547  | 1.62396429  |
| H  | -1.35170895 | 2.88069836  | 1.76071469  |
| C  | 0.70483394  | 5.56267289  | 1.54596488  |
| H  | 2.84817761  | 5.33172548  | 1.49622604  |
| H  | -1.43811656 | 5.34001025  | 1.63155319  |
| C  | 0.70477806  | 7.05165145  | 1.44084702  |
| H  | 0.68834383  | 7.35461087  | 0.38953700  |
| H  | -0.17331585 | 7.48451081  | 1.92113415  |
| H  | 1.59955887  | 7.48203932  | 1.89196279  |
| Cl | 0.70488050  | -1.62145078 | 1.99022024  |

## 34.

|    |             |             |             |
|----|-------------|-------------|-------------|
| Ag | 0.71523406  | 0.56671211  | 1.05770358  |
| N  | 2.84051326  | 0.56676211  | 1.05774858  |
| C  | 3.54135416  | -0.57312669 | 1.09769398  |
| C  | 3.54134536  | 1.70672051  | 1.01781558  |
| C  | 4.91350356  | -0.62490629 | 1.09936498  |
| H  | 2.96497956  | -1.48978529 | 1.12991728  |
| C  | 4.91354136  | 1.75844681  | 1.01589758  |
| H  | 2.96497636  | 2.62329801  | 0.98573298  |
| C  | 5.64887886  | 0.56679151  | 1.05739588  |
| H  | 5.41237036  | -1.58588029 | 1.13313638  |
| H  | 5.41233666  | 2.71945821  | 0.98224738  |
| N  | 6.99901566  | 0.56667491  | 1.05706178  |
| H  | 7.51496996  | -0.29214599 | 1.08597718  |
| H  | 7.51521646  | 1.42512211  | 1.02652078  |
| Cl | -1.55790364 | 0.56663681  | 1.05769928  |
| Ag | 0.71529877  | 0.44765142  | -1.86487226 |
| N  | 0.71534690  | -1.67586641 | -1.77836383 |
| C  | -0.42522301 | -2.37639201 | -1.75635808 |
| C  | 1.85598584  | -2.37585279 | -1.74333094 |
| C  | -0.47702770 | -3.74742331 | -1.70097457 |
| H  | -1.34243343 | -1.80070351 | -1.78493795 |
| C  | 1.90774734  | -3.74690505 | -1.68731664 |
| H  | 2.77310950  | -1.79974642 | -1.76151029 |
| C  | 0.71539064  | -4.48192133 | -1.66446369 |
| H  | -1.43857980 | -4.24609655 | -1.68606882 |
| H  | 2.86933187  | -4.24506298 | -1.66151258 |
| N  | 0.71528774  | -5.83095417 | -1.60987517 |
| H  | -0.14399824 | -6.34672889 | -1.59496531 |
| H  | 1.57426654  | -6.34654675 | -1.58443259 |
| Cl | 0.71522371  | 2.71890695  | -1.95735632 |

## 35.

|    |             |             |             |
|----|-------------|-------------|-------------|
| Ag | 0.70742531  | 0.48335542  | -1.18211006 |
| N  | 2.83677091  | 0.47702042  | -1.18180556 |
| C  | 3.52237091  | -0.66805098 | -1.14171056 |
| C  | 3.53773731  | 1.61704912  | -1.22178086 |
| C  | 4.89935521  | -0.72544518 | -1.13989886 |
| H  | 2.93869751  | -1.57975648 | -1.10964406 |
| C  | 4.91270221  | 1.66186892  | -1.22352166 |
| H  | 2.96140381  | 2.53329532  | -1.25381776 |
| C  | 5.61869951  | 0.46426752  | -1.18181306 |
| H  | 5.39906471  | -1.68670278 | -1.10618396 |
| H  | 5.44012241  | 2.60563662  | -1.25663096 |
| O  | 6.95508281  | 0.51832372  | -1.18417526 |
| H  | 7.32661591  | -0.36915498 | -1.15369306 |
| Cl | -1.56245479 | 0.47860802  | -1.18200156 |
| Ag | 0.70733133  | 0.59225588  | 1.74086200  |
| N  | 0.71367327  | 2.72012519  | 1.66158471  |
| C  | 1.85944364  | 3.40515483  | 1.63351089  |
| C  | -0.42705343 | 3.42069643  | 1.63792294  |
| C  | 1.91686551  | 4.78117071  | 1.58187595  |
| H  | 2.77171097  | 2.82181711  | 1.65339158  |
| C  | -0.47190696 | 4.79470371  | 1.58661527  |
| H  | -1.34385722 | 2.84484028  | 1.66146597  |
| C  | 0.72641707  | 5.50010376  | 1.55744006  |
| H  | 2.87871196  | 5.28045617  | 1.56119063  |
| H  | -1.41625309 | 5.32183291  | 1.56898124  |
| O  | 0.67231041  | 6.83554590  | 1.50729286  |
| H  | 1.56030878  | 7.20672587  | 1.49089814  |
| Cl | 0.71207947  | -1.67605031 | 1.82537649  |

## 36.

|    |             |             |             |
|----|-------------|-------------|-------------|
| Ag | 0.69462153  | 0.52344678  | -0.01247469 |
| C  | -1.30807747 | 0.52339640  | -0.01250547 |
| N  | -2.46466407 | 0.52337552  | -0.01249749 |
| N  | 2.82946783  | 0.52350368  | -0.01243599 |
| C  | 3.51333563  | -0.62346782 | 0.02775031  |
| C  | 3.51327273  | 1.67051998  | -0.05267119 |
| C  | 4.89457533  | -0.66715152 | 0.02918561  |
| H  | 2.92650793  | -1.53326012 | 0.05971531  |
| C  | 4.89450563  | 1.71424798  | -0.05429059 |
| H  | 2.92640343  | 2.58027938  | -0.08451259 |
| C  | 5.60014153  | 0.52357438  | -0.01262139 |
| H  | 5.39989483  | -1.62347192 | 0.06270291  |
| H  | 5.39979453  | 2.67060468  | -0.08784239 |
| H  | 6.68363833  | 0.52361408  | -0.01271649 |
| Ag | 0.69456678  | 0.56300623  | 2.94976117  |
| C  | 0.69461674  | -1.43951414 | 2.97650866  |
| N  | 0.69463155  | -2.59599727 | 2.99197881  |
| N  | 0.69450902  | 2.69766219  | 2.92125371  |
| C  | 1.84191398  | 3.38180239  | 2.93699483  |
| C  | -0.45294227 | 3.38107177  | 2.88717594  |
| C  | 1.88561205  | 4.76293002  | 2.91937764  |

|   |             |            |            |
|---|-------------|------------|------------|
| H | 2.75205202  | 2.79529291 | 2.96467020 |
| C | -0.49668886 | 4.76216729 | 2.86767021 |
| H | -1.36304500 | 2.79399083 | 2.87531825 |
| C | 0.69443407  | 5.46808571 | 2.88402017 |
| H | 2.84229404  | 5.26848258 | 2.93338057 |
| H | -1.45340826 | 5.26713232 | 2.84011953 |
| H | 0.69439241  | 6.55148437 | 2.86943723 |

**37.**

|    |             |             |             |
|----|-------------|-------------|-------------|
| Ag | 0.69312673  | 0.49002569  | -1.06344413 |
| C  | -1.30875247 | 0.48997179  | -1.06348023 |
| N  | -2.46526007 | 0.48995609  | -1.06347393 |
| N  | 2.82972853  | 0.49007609  | -1.06339703 |
| C  | 3.51546753  | -0.65620151 | -1.02323903 |
| C  | 3.51544183  | 1.63639649  | -1.10361173 |
| C  | 4.89453333  | -0.70982991 | -1.02148693 |
| H  | 2.93200563  | -1.56798311 | -0.99118203 |
| C  | 4.89445583  | 1.69007359  | -1.10560873 |
| H  | 2.93191233  | 2.54815939  | -1.13550243 |
| C  | 5.57693713  | 0.49012709  | -1.06365023 |
| H  | 5.42302123  | -1.65280871 | -0.98843593 |
| H  | 5.42294933  | 2.63306299  | -1.13869353 |
| F  | 6.89892253  | 0.49016839  | -1.06383823 |
| Ag | 0.69305927  | 0.58355678  | 1.89757903  |
| C  | 0.69311200  | -1.41732422 | 1.96078952  |
| N  | 0.69312789  | -2.57325427 | 1.99733452  |
| N  | 0.69301038  | 2.71909346  | 1.83012294  |
| C  | 1.83998432  | 3.40461569  | 1.81242963  |
| C  | -0.45400812 | 3.40433713  | 1.80443070  |
| C  | 1.89364130  | 4.78299489  | 1.76891810  |
| H  | 2.75232340  | 2.82154855  | 1.83413748  |
| C  | -0.50772150 | 4.78265312  | 1.76055913  |
| H  | -1.36632327 | 2.82100069  | 1.81975883  |
| C  | 0.69295142  | 5.46492263  | 1.74307509  |
| H  | 2.83719341  | 5.31132273  | 1.75550378  |
| H  | -1.45128528 | 5.31077795  | 1.74054528  |
| F  | 0.69290421  | 6.78624216  | 1.70112120  |

**38.**

|    |             |             |             |
|----|-------------|-------------|-------------|
| Ag | 0.69799328  | 0.51033510  | -0.18384499 |
| C  | -1.30326402 | 0.51012990  | -0.17563989 |
| N  | -2.45965622 | 0.51013730  | -0.17246219 |
| N  | 2.83591088  | 0.51097590  | -0.18768609 |
| C  | 3.51856368  | -0.63555390 | -0.14025949 |
| C  | 3.51790188  | 1.65821120  | -0.21990459 |
| C  | 4.89909368  | -0.68075510 | -0.12190169 |
| H  | 2.93406708  | -1.54670970 | -0.11393849 |
| C  | 4.89864558  | 1.70550110  | -0.20482789 |
| H  | 2.93286818  | 2.56868510  | -0.25683089 |
| C  | 5.59900638  | 0.51295240  | -0.15379779 |
| H  | 5.41093698  | -1.63262030 | -0.07537419 |
| H  | 5.40980358  | 2.65863900  | -0.22463679 |
| C  | 7.10703068  | 0.51049590  | -0.17412289 |
| F  | 7.60450178  | 1.61818910  | 0.37591841  |
| F  | 7.55798308  | 0.44436670  | -1.43091549 |
| F  | 7.60103978  | -0.53627730 | 0.48769591  |
| Ag | 0.70326011  | 0.72487491  | 2.78340457  |
| C  | 0.70406467  | -1.27084966 | 2.93233724  |
| N  | 0.70428843  | -2.42415390 | 3.01684937  |
| N  | 0.70234398  | 2.85722963  | 2.62923145  |
| C  | 1.84924649  | 3.53555592  | 2.54389221  |
| C  | -0.44413425 | 3.54123681  | 2.63375104  |
| C  | 1.89568476  | 4.91371846  | 2.46170513  |
| H  | 2.75985499  | 2.94961557  | 2.54404550  |
| C  | -0.49017672 | 4.91986334  | 2.55510119  |
| H  | -1.35484991 | 2.95979683  | 2.70527204  |
| C  | 0.70288521  | 5.61586724  | 2.46870952  |
| H  | 2.84838770  | 5.42260771  | 2.40183379  |
| H  | -1.44217171 | 5.43332197  | 2.56967930  |
| C  | 0.70383810  | 7.11871667  | 2.34222195  |
| F  | -0.36018934 | 7.65930448  | 2.93603807  |
| F  | 0.67693620  | 7.48003640  | 1.05537187  |
| F  | 1.79664732  | 7.65248870  | 2.88870039  |

**39.**

|    |             |             |             |
|----|-------------|-------------|-------------|
| Ag | 0.70033775  | 0.47635814  | -1.15076380 |
| C  | -1.30093365 | 0.47626694  | -1.15081580 |
| N  | -2.45728095 | 0.47624634  | -1.15080760 |
| N  | 2.84108875  | 0.47639904  | -1.15067870 |
| C  | 3.51990935  | -0.67317346 | -1.11035510 |
| C  | 3.51995335  | 1.62595354  | -1.19107530 |
| C  | 4.90138735  | -0.72443466 | -1.10880710 |
| H  | 2.93263275  | -1.58225576 | -1.07831870 |
| C  | 4.90146495  | 1.67710304  | -1.19304740 |
| H  | 2.93272625  | 2.53504794  | -1.22292730 |

|    |             |             |             |
|----|-------------|-------------|-------------|
| C  | 5.57636965  | 0.47634174  | -1.15113460 |
| H  | 5.43684725  | -1.66247776 | -1.07597030 |
| H  | 5.43694105  | 2.61514794  | -1.22602720 |
| N  | 7.05323645  | 0.47624464  | -1.15177670 |
| O  | 7.59831105  | 1.55318274  | -1.18869990 |
| O  | 7.59821445  | -0.60078446 | -1.11542920 |
| Ag | 0.70021774  | 0.59801818  | 1.80923706  |
| C  | 0.70030673  | -1.40156392 | 1.89144799  |
| N  | 0.70032765  | -2.55693351 | 1.93898947  |
| N  | 0.70018037  | 2.73696326  | 1.72132352  |
| C  | 1.85043934  | 3.41492755  | 1.68655198  |
| C  | -0.45006360 | 3.41553355  | 1.70021086  |
| C  | 1.90172089  | 4.79521498  | 1.62920747  |
| H  | 2.76007059  | 2.82793003  | 1.70541094  |
| C  | -0.50125094 | 4.79588268  | 1.64354877  |
| H  | -1.35969937 | 2.82902773  | 1.72981699  |
| C  | 0.70021893  | 5.46991333  | 1.60842642  |
| H  | 2.84032140  | 5.32998899  | 1.60152583  |
| H  | -1.43985911 | 5.33113359  | 1.62706460  |
| N  | 0.70028960  | 6.94550526  | 1.54707164  |
| O  | -0.37725661 | 7.49041883  | 1.53194959  |
| O  | 1.77790312  | 7.48969912  | 1.51680626  |

#### 40.

|    |             |             |             |
|----|-------------|-------------|-------------|
| Ag | 0.69334153  | 0.47416075  | -0.89303432 |
| C  | -1.30886537 | 0.47425465  | -0.89022872 |
| N  | -2.46544767 | 0.47424975  | -0.89073062 |
| N  | 2.82364593  | 0.47412765  | -0.89809432 |
| C  | 3.51362603  | -0.66920085 | -0.85513692 |
| C  | 3.51335613  | 1.61763425  | -0.93530642 |
| C  | 4.89256583  | -0.70920905 | -0.84479092 |
| H  | 2.93144403  | -1.58228185 | -0.82369622 |
| C  | 4.89241543  | 1.65854905  | -0.92779312 |
| H  | 2.93106723  | 2.53063055  | -0.96788892 |
| C  | 5.62124273  | 0.47498195  | -0.88020752 |
| H  | 5.39487903  | -1.66815455 | -0.80412212 |
| H  | 5.39459223  | 2.61800525  | -0.95438472 |
| C  | 7.11353623  | 0.47456795  | -0.88600612 |
| H  | 7.48582473  | 0.42239305  | -1.91356832 |
| H  | 7.51256073  | 1.38473565  | -0.43711522 |
| H  | 7.51192173  | -0.38649205 | -0.34819612 |
| Ag | 0.70036998  | 0.63789946  | 2.06492891  |
| C  | 0.70042668  | -1.36135535 | 2.17365130  |
| N  | 0.70039613  | -2.51634464 | 2.23433573  |
| N  | 0.70012336  | 2.76495352  | 1.94718595  |
| C  | 1.84403097  | 3.45274352  | 1.88770280  |
| C  | -0.44362312 | 3.45522585  | 1.93941922  |
| C  | 1.88457675  | 4.83017662  | 1.82276619  |
| H  | 2.75740289  | 2.87024792  | 1.89729028  |
| C  | -0.48402908 | 4.83287589  | 1.87631005  |
| H  | -1.35698285 | 2.87482057  | 1.99029095  |
| C  | 0.70031721  | 5.55958020  | 1.81706979  |
| H  | 2.84427493  | 5.33100489  | 1.78154210  |
| H  | -1.44342005 | 5.33587608  | 1.87845851  |
| C  | 0.70040470  | 7.04947657  | 1.73232038  |
| H  | 0.69326700  | 7.36681539  | 0.68520522  |
| H  | -0.18237383 | 7.47443016  | 2.21111611  |
| H  | 1.59103439  | 7.47307738  | 2.19784807  |

#### 41.

|    |             |             |             |
|----|-------------|-------------|-------------|
| Ag | 0.70766928  | 0.52031906  | -1.30023924 |
| C  | -1.29565142 | 0.52024406  | -1.30027734 |
| N  | -2.45243552 | 0.52022266  | -1.30027414 |
| N  | 2.83411718  | 0.52036826  | -1.30018544 |
| C  | 3.53463128  | -0.62046474 | -1.26025664 |
| C  | 3.53465608  | 1.66116456  | -1.34018594 |
| C  | 4.90622608  | -0.67180444 | -1.25864644 |
| H  | 2.95793678  | -1.53717984 | -1.22800224 |
| C  | 4.90626998  | 1.71249476  | -1.34213944 |
| H  | 2.95797668  | 2.57790676  | -1.37221824 |
| C  | 5.64144328  | 0.52030476  | -1.30057864 |
| H  | 5.40681918  | -1.63169714 | -1.22498274 |
| H  | 5.40686058  | 2.67236776  | -1.37577964 |
| N  | 6.99036928  | 0.52022786  | -1.30075514 |
| H  | 7.50667288  | -0.33848624 | -1.27185984 |
| H  | 7.50681168  | 1.37882936  | -1.33155664 |
| Ag | 0.70759414  | 0.52789269  | 1.66225108  |
| C  | 0.70766904  | -1.47542144 | 1.66738507  |
| N  | 0.70769045  | -2.63220167 | 1.67037486  |
| N  | 0.70754508  | 2.65433364  | 1.65681483  |
| C  | 1.84847549  | 3.35494104  | 1.69204715  |
| C  | -0.43334881 | 3.35477438  | 1.61789340  |
| C  | 1.89981910  | 4.72653509  | 1.68998614  |
| H  | 2.76526929  | 2.77832574  | 1.72346996  |
| C  | -0.48468379 | 4.72637900  | 1.61252853  |

|   |             |            |            |
|---|-------------|------------|------------|
| H | -1.35016916 | 2.77802019 | 1.58967060 |
| C | 0.70760758  | 5.46164937 | 1.64917337 |
| H | 2.85979393  | 5.22720716 | 1.71992756 |
| H | -1.44463887 | 5.22688736 | 1.58002566 |
| N | 0.70768404  | 6.81057041 | 1.64551395 |
| H | 1.56646853  | 7.32694128 | 1.67090253 |
| H | -0.15099267 | 7.32693718 | 1.61555250 |

**42.**

|    |             |             |             |
|----|-------------|-------------|-------------|
| Ag | 0.69864547  | 0.50460512  | -1.01362811 |
| C  | -1.30383253 | 0.50185642  | -1.01358921 |
| N  | -2.46046143 | 0.49977792  | -1.01351561 |
| N  | 2.83048277  | 0.49838612  | -1.01332791 |
| C  | 3.51588197  | -0.64725968 | -0.97322131 |
| C  | 3.53125517  | 1.63891892  | -1.05332801 |
| C  | 4.89242737  | -0.70496058 | -0.97140851 |
| H  | 2.93211527  | -1.55918988 | -0.94114351 |
| C  | 4.90578607  | 1.68338712  | -1.05506731 |
| H  | 2.95544057  | 2.55576112  | -1.08538031 |
| C  | 5.61170947  | 0.48526792  | -1.01334191 |
| H  | 5.39176037  | -1.66639758 | -0.93769231 |
| H  | 5.43356067  | 2.62697982  | -1.08817111 |
| O  | 6.94678037  | 0.54094052  | -1.01575841 |
| H  | 7.32182847  | -0.34526178 | -0.98528581 |
| Ag | 0.69842026  | 0.57037214  | 1.94814178  |
| C  | 0.70116914  | -1.43160946 | 1.99272674  |
| N  | 0.70324875  | -2.58795074 | 2.01851921  |
| N  | 0.70464439  | 2.70168407  | 1.90081581  |
| C  | 1.85089710  | 3.38724178  | 1.90029502  |
| C  | -0.43649420 | 3.40195386  | 1.87045183  |
| C  | 1.90862399  | 4.76345754  | 1.87016697  |
| H  | 2.76331377  | 2.80388489  | 1.92519051  |
| C  | -0.48098999 | 4.77612686  | 1.83907812  |
| H  | -1.35382112 | 2.82602017  | 1.87152111  |
| C  | 0.71775909  | 5.48221387  | 1.83855751  |
| H  | 2.87057160  | 5.26294368  | 1.87147810  |
| H  | -1.42508411 | 5.30349830  | 1.81510472  |
| O  | 0.66204666  | 6.81692711  | 1.80763376  |
| H  | 1.54870622  | 7.19212403  | 1.81013550  |

**43.**

|    |             |             |             |
|----|-------------|-------------|-------------|
| Cl | -0.98180983 | -3.12884800 | 0.00000065  |
| Au | 1.24014037  | -3.12884860 | 0.00000015  |
| N  | 3.20334967  | -3.12885110 | -0.00000225 |
| C  | 4.34536047  | -3.12885310 | -0.00000405 |
| H  | 5.41425067  | -3.12885720 | -0.00000785 |
| Cl | 1.24014494  | 0.04614961  | 2.22194973  |
| Au | 1.24014444  | 0.04615140  | -0.00000047 |
| N  | 1.24014204  | 0.04615102  | -1.96320977 |
| C  | 1.24014024  | 0.04615025  | -3.10522057 |
| H  | 1.24013644  | 0.04614730  | -4.17411077 |

**44.**

|    |             |             |             |
|----|-------------|-------------|-------------|
| Cl | -0.97566008 | -2.64138890 | 0.00000084  |
| Au | 1.24679582  | -2.64138960 | 0.00000024  |
| N  | 3.23273942  | -2.64139280 | -0.00000276 |
| C  | 4.37577322  | -2.64139490 | -0.00000466 |
| F  | 5.62264572  | -2.64139860 | -0.00000816 |
| Cl | 1.24680149  | 0.50860844  | 2.22245483  |
| Au | 1.24680089  | 0.50861040  | -0.00000107 |
| N  | 1.24679789  | 0.50860958  | -1.98594467 |
| C  | 1.24679599  | 0.50860884  | -3.12897847 |
| F  | 1.24679249  | 0.50860664  | -4.37585097 |

**45.**

|    |             |             |             |
|----|-------------|-------------|-------------|
| Cl | -0.92106274 | -2.26123344 | -0.23671637 |
| Au | 1.29693946  | -2.26128254 | -0.23672557 |
| N  | 3.25163346  | -2.26131024 | -0.23682457 |
| C  | 4.39550666  | -2.26129964 | -0.23703817 |
| C  | 5.88291986  | -2.26127654 | -0.23689667 |
| F  | 6.32749126  | -3.09640314 | -1.16067937 |
| F  | 6.32687726  | -2.64383374 | 0.94842213  |
| F  | 6.32728206  | -1.04357604 | -0.49810657 |
| Cl | 1.29702701  | -5.37330134 | 2.04099184  |
| Au | 1.29707734  | -3.27880850 | 2.77080928  |
| N  | 1.29713607  | -1.43293158 | 3.41390107  |
| C  | 1.29719492  | -0.35268603 | 3.79008650  |
| C  | 1.29712828  | 1.05186051  | 4.27962410  |
| F  | 2.38423459  | 1.67155545  | 3.85226864  |
| F  | 1.27968976  | 1.06130986  | 5.60175702  |
| F  | 0.22734066  | 1.68128673  | 3.82370747  |

**46.**

|    |             |             |            |
|----|-------------|-------------|------------|
| Cl | -0.87842450 | -3.12002002 | 0.78036603 |
| Au | 1.33505540  | -3.12001832 | 0.78036763 |

|    |            |             |             |
|----|------------|-------------|-------------|
| N  | 3.28421250 | -3.12002502 | 0.78036143  |
| C  | 4.43042740 | -3.12004352 | 0.78034443  |
| N  | 5.84720580 | -3.12001742 | 0.78036843  |
| O  | 6.36035820 | -2.32159662 | 1.52046253  |
| O  | 6.36037900 | -3.91845822 | 0.04025583  |
| Cl | 1.33505363 | 0.68945184  | 0.09622398  |
| Au | 1.33505596 | -0.87745811 | -1.46719743 |
| N  | 1.33504684 | -2.25725572 | -2.84392252 |
| C  | 1.33502174 | -3.06865554 | -3.65351434 |
| N  | 1.33505716 | -4.07158399 | -4.65421188 |
| O  | 2.42299679 | -4.40656750 | -5.04499809 |
| O  | 0.24709032 | -4.46313133 | -4.98833749 |

**47.**

|    |             |             |             |
|----|-------------|-------------|-------------|
| Cl | -0.91943083 | -2.61276766 | 0.05718242  |
| Au | 1.30690057  | -2.61276926 | 0.05718152  |
| N  | 3.27806207  | -2.61277166 | 0.05717892  |
| C  | 4.42290027  | -2.61277386 | 0.05717632  |
| C  | 5.86566797  | -2.61277986 | 0.05717062  |
| H  | 6.23522037  | -1.60888876 | -0.15825548 |
| H  | 6.23521787  | -2.92816376 | 1.03427832  |
| H  | 6.23520997  | -3.30129186 | -0.70451358 |
| Cl | 1.23117746  | 1.00316065  | 1.56986759  |
| Au | 1.23240202  | 0.49315731  | -0.59726106 |
| N  | 1.23348428  | 0.04160714  | -2.51600516 |
| C  | 1.23411162  | -0.22065093 | -3.63039953 |
| C  | 1.23489926  | -0.55116097 | -5.03480016 |
| H  | 1.20720413  | 0.36325267  | -5.62965761 |
| H  | 2.13790996  | -1.11172341 | -5.28201468 |
| H  | 0.36019063  | -1.15898155 | -5.27189054 |

**48.**

|    |             |             |             |
|----|-------------|-------------|-------------|
| Cl | -0.91731660 | -2.64543866 | 0.33174433  |
| Au | 1.31103740  | -2.64544016 | 0.33174283  |
| N  | 3.28824020  | -2.64544366 | 0.33173953  |
| C  | 4.43888740  | -2.64544546 | 0.33173783  |
| N  | 5.74730530  | -2.64545156 | 0.33173233  |
| H  | 6.25552510  | -3.28141136 | -0.25776907 |
| H  | 6.25553630  | -2.00949256 | 0.92123273  |
| Cl | 1.31103942  | 1.14256065  | -0.50326396 |
| Au | 1.31103730  | -0.50019741 | -2.00888925 |
| N  | 1.31103249  | -1.95780506 | -3.34481995 |
| C  | 1.31103002  | -2.80607018 | -4.12227430 |
| N  | 1.31102181  | -3.77064503 | -5.00632903 |
| H  | 0.44388117  | -4.14200593 | -5.35331943 |
| H  | 2.17816117  | -4.14861862 | -5.34612102 |

**49.**

|    |             |             |             |
|----|-------------|-------------|-------------|
| Cl | -0.95192800 | -2.97593988 | 0.78191673  |
| Au | 1.27416070  | -2.97630788 | 0.78161663  |
| N  | 3.25803320  | -2.96993548 | 0.78754223  |
| C  | 4.40399330  | -2.94505648 | 0.81056053  |
| O  | 5.67863670  | -2.98446048 | 0.77401183  |
| H  | 6.07650530  | -2.33621948 | 1.37449573  |
| Cl | 1.27558114  | 0.74367385  | -0.27403047 |
| Au | 1.27510649  | -0.98566254 | -1.67576745 |
| N  | 1.28378798  | -2.52720951 | -2.92452018 |
| C  | 1.31760830  | -3.41885685 | -3.64437750 |
| O  | 1.26398537  | -4.40678890 | -4.44980852 |
| H  | 2.14565251  | -4.75291468 | -4.65464197 |

**50.**

|    |             |             |             |
|----|-------------|-------------|-------------|
| N  | 2.76351490  | -1.76775006 | -0.00000244 |
| C  | 3.90546800  | -1.76775196 | -0.00000414 |
| H  | 4.97451060  | -1.76775596 | -0.00000784 |
| Br | -1.56382740 | -1.76774686 | 0.00000066  |
| Au | 0.78498290  | -1.76774746 | 0.00000006  |
| N  | 0.78498040  | 1.38224976  | -1.97853223 |
| C  | 0.78497870  | 1.38224775  | -3.12048533 |
| H  | 0.78497500  | 1.38224365  | -4.18952793 |
| Br | 0.78498350  | 1.38225336  | 2.34881007  |
| Au | 0.78498290  | 1.38225254  | -0.00000023 |

**51.**

|    |             |             |             |
|----|-------------|-------------|-------------|
| N  | 1.70973602  | -1.15160620 | -0.00000312 |
| C  | 2.85296082  | -1.15160810 | -0.00000492 |
| Br | -2.64125668 | -1.15160200 | 0.00000078  |
| F  | 4.09961932  | -1.15161150 | -0.00000802 |
| Au | -0.29234788 | -1.15160280 | 0.00000008  |
| N  | -0.29234577 | 1.97339665  | -2.00208467 |
| C  | -0.29234757 | 1.97339638  | -3.14530947 |
| Br | -0.29234187 | 1.97339465  | 2.34890803  |
| F  | -0.29235067 | 1.97339476  | -4.39196797 |
| Au | -0.29234257 | 1.97339720  | -0.00000077 |



52.

|    |             |             |             |
|----|-------------|-------------|-------------|
| N  | -0.11177968 | -0.14477952 | -0.00851810 |
| C  | 1.03205952  | -0.14476732 | -0.00873520 |
| Br | -4.42715158 | -0.14470172 | -0.00842260 |
| C  | 2.51994402  | -0.14474462 | -0.00859620 |
| F  | 2.96411152  | -0.97988282 | -0.93239540 |
| F  | 2.96349712  | -0.52730732 | 1.17673560  |
| F  | 2.96390212  | 1.07297338  | -0.26981370 |
| Au | -2.08203698 | -0.14475152 | -0.00842770 |
| N  | -2.08211749 | 2.52694096  | -2.59037910 |
| C  | -2.08232732 | 2.28925650  | -3.70925096 |
| Br | -2.08200791 | 3.42392071  | 1.63074183  |
| C  | -2.08218663 | 1.98000190  | -5.16464158 |
| F  | -3.15939590 | 1.27644578  | -5.46923070 |
| F  | -1.00225899 | 1.28078232  | -5.46952403 |
| F  | -2.08459324 | 3.10594829  | -5.85775732 |
| Au | -2.08202325 | 2.93645579  | -0.66315015 |

53.

|    |             |             |             |
|----|-------------|-------------|-------------|
| N  | 1.63746516  | -0.95105781 | -0.34157029 |
| C  | 2.78377066  | -0.95106361 | -0.34157189 |
| Br | -2.66707154 | -0.95105171 | -0.34156539 |
| N  | 4.20063076  | -0.95105581 | -0.34157689 |
| O  | 4.71375996  | -2.03990231 | -0.34158329 |
| O  | 4.71376766  | 0.13775699  | -0.34157429 |
| Au | -0.32674174 | -0.95105401 | -0.34156699 |
| N  | -0.32673263 | 1.02171060  | 2.81560180  |
| C  | -0.32672683 | 2.16801190  | 2.81249760  |
| Br | -0.32673871 | -3.28281032 | 2.82725734  |
| N  | -0.32673464 | 3.58486679  | 2.80865776  |
| O  | 0.76210784  | 4.09798611  | 2.80431180  |
| O  | -1.41554344 | 4.09800981  | 2.81022214  |
| Au | -0.32673642 | -0.94248910 | 2.82092141  |

54.

|    |             |             |             |
|----|-------------|-------------|-------------|
| N  | 1.67606263  | -0.95938935 | 0.02389308  |
| C  | 2.82091303  | -0.95939135 | 0.02389018  |
| Br | -2.66244107 | -0.95938525 | 0.02389628  |
| C  | 4.26369473  | -0.95939695 | 0.02388468  |
| H  | 4.63297583  | 0.04456605  | -0.19155702 |
| H  | 4.63297323  | -1.27480405 | 1.00106278  |
| H  | 4.63296513  | -1.64795915 | -0.73785462 |
| Au | -0.30954437 | -0.95938675 | 0.02389558  |
| N  | -0.30954416 | 1.70903849  | -2.57314928 |
| C  | -0.30954741 | 1.47104985  | -3.69299027 |
| Br | -0.30954018 | 2.61091405  | 1.67057960  |
| C  | -0.30955396 | 1.17112543  | -5.10425367 |
| H  | -0.31158711 | 2.09874670  | -5.67891878 |
| H  | 0.58071108  | 0.59388703  | -5.35910516 |
| H  | -1.19778999 | 0.59044546  | -5.35836548 |
| Au | -0.30954117 | 2.12180119  | -0.63091806 |

55.

|    |             |             |             |
|----|-------------|-------------|-------------|
| N  | 1.99106931  | -0.76430090 | -0.66738487 |
| C  | 3.14184611  | -0.76430250 | -0.66738697 |
| Br | -2.35463709 | -0.76429580 | -0.66738007 |
| N  | 4.45011681  | -0.76430990 | -0.66738927 |
| H  | 4.95826141  | 0.10290820  | -0.66738997 |
| H  | 4.95825261  | -1.63152520 | -0.66739717 |
| Au | -0.00000119 | -0.76429730 | -0.66738137 |
| N  | 0.00000797  | 1.24248577  | 2.47263192  |
| C  | 0.00000956  | 2.39324820  | 2.46688256  |
| Br | 0.00000289  | -3.10316641 | 2.49434023  |
| N  | 0.00001695  | 3.70150258  | 2.46034641  |
| H  | -0.86719033 | 4.20966248  | 2.46214202  |
| H  | 0.86722138  | 4.20961035  | 2.45346667  |
| Au | 0.00000439  | -0.74855988 | 2.48257932  |

56.

|    |             |             |             |
|----|-------------|-------------|-------------|
| N  | 1.59444907  | 0.11614457  | 0.39864530  |
| C  | 2.74064717  | 0.14105427  | 0.42168830  |
| Br | -2.75659293 | 0.11098217  | 0.39379130  |
| O  | 4.01503087  | 0.10242697  | 0.38585240  |
| H  | 4.41256307  | 0.75080347  | 0.98648570  |
| Au | -0.40425363 | 0.11005177  | 0.39297640  |
| N  | -0.39516776 | 0.56475775  | -3.29917039 |
| C  | -0.36128942 | -0.32047734 | -4.02727248 |
| Br | -0.40223903 | 3.92079038  | -0.52994457 |
| O  | -0.41388984 | -1.30138658 | -4.84083278 |
| H  | 0.46846794  | -1.64042272 | -5.05456985 |
| Au | -0.40347515 | 2.10657326  | -2.02731441 |

57.

|   |            |             |             |
|---|------------|-------------|-------------|
| N | 3.14698100 | -0.41164512 | -0.00000259 |
| C | 4.28890230 | -0.41164702 | -0.00000439 |

|    |             |             |             |
|----|-------------|-------------|-------------|
| H  | 5.35813730  | -0.41165082 | -0.00000789 |
| I  | -1.36686710 | -0.41164182 | 0.00000051  |
| Au | 1.14334460  | -0.41164232 | 0.00000001  |
| N  | 1.14334638  | 2.71335755  | -2.00363660 |
| C  | 1.14334458  | 2.71335717  | -3.14555790 |
| H  | 1.14334108  | 2.71335480  | -4.21479290 |
| I  | 1.14334948  | 2.71335483  | 2.51021150  |
| Au | 1.14334898  | 2.71335768  | -0.00000020 |

58.

|    |             |             |             |
|----|-------------|-------------|-------------|
| N  | 1.39268064  | -2.23019498 | -0.00000330 |
| C  | 2.53622694  | -2.23019698 | -0.00000510 |
| I  | -3.14561126 | -2.23019088 | 0.00000060  |
| F  | 3.78281394  | -2.23020028 | -0.00000820 |
| Au | -0.63628546 | -2.23019148 | 0.00000000  |
| N  | -0.63628344 | 0.85730803  | -2.02896684 |
| C  | -0.63628524 | 0.85730773  | -3.17251314 |
| I  | -0.63627954 | 0.85730540  | 2.50932506  |
| F  | -0.63628834 | 0.85730628  | -4.41910014 |
| Au | -0.63628014 | 0.85730852  | -0.00000074 |

59.

|    |             |             |             |
|----|-------------|-------------|-------------|
| N  | 1.79780582  | -0.13276290 | 0.16025814  |
| C  | 2.94161772  | -0.13299800 | 0.16016534  |
| I  | -2.70488698 | -0.13265990 | 0.16035424  |
| C  | 4.42994742  | -0.13284100 | 0.16025024  |
| F  | 4.87401862  | -1.03029210 | -0.70307126 |
| F  | 4.87350892  | -0.43169900 | 1.36934494  |
| F  | 4.87327222  | 1.06379450  | -0.18538216 |
| Au | -0.19778718 | -0.13266050 | 0.16032014  |
| N  | -0.19775005 | 2.28468314  | -2.63726765 |
| C  | -0.19790582 | 1.95959656  | -3.73390999 |
| I  | -0.19762866 | 3.56372563  | 1.67994125  |
| C  | -0.19777981 | 1.53696296  | -5.16097206 |
| F  | -1.28050904 | 0.82099013  | -5.41201400 |
| F  | 0.87657247  | 0.80684929  | -5.40729319 |
| F  | -0.18917513 | 2.60525740  | -5.93982258 |
| Au | -0.19766152 | 2.85160153  | -0.72389498 |

60.

|    |             |             |            |
|----|-------------|-------------|------------|
| N  | 1.96254199  | -1.82619293 | 0.07458221 |
| C  | 3.10906939  | -1.82619903 | 0.07458061 |
| I  | -2.52771181 | -1.82617873 | 0.07458731 |
| N  | 4.52534789  | -1.82616993 | 0.07457591 |
| O  | 5.03885809  | -2.91533253 | 0.07456951 |
| O  | 5.03883949  | -0.73703783 | 0.07457851 |
| Au | -0.02579521 | -1.82618193 | 0.07458571 |
| N  | -0.02577854 | 0.20342027  | 3.17294411 |
| C  | -0.02577246 | 1.34984686  | 3.15774072 |
| I  | -0.02579267 | -4.28643875 | 3.23248528 |
| N  | -0.02580162 | 2.76600081  | 3.13895810 |
| O  | 1.06326510  | 3.27927426  | 3.11769928 |
| O  | -1.11483789 | 3.27963883  | 3.14659579 |
| Au | -0.02578949 | -1.78474210 | 3.19931094 |

61.

|    |             |             |             |
|----|-------------|-------------|-------------|
| N  | 0.03439364  | 0.66934503  | 0.06509088  |
| C  | 1.17930264  | 0.66934103  | 0.06508818  |
| I  | -4.48835976 | 0.66934663  | 0.06509338  |
| C  | 2.62220034  | 0.66933423  | 0.06508208  |
| H  | 2.99142004  | 1.65578663  | -0.21987562 |
| H  | 2.99142074  | 0.42288763  | 1.06185318  |
| H  | 2.99141194  | -0.07067307 | -0.64673442 |
| Au | -1.97492256 | 0.66934713  | 0.06509318  |
| N  | -1.97492318 | 3.12652944  | -2.72152335 |
| C  | -1.97492687 | 2.81374245  | -3.82287748 |
| I  | -1.97492034 | 4.36212618  | 1.62917763  |
| C  | -1.97493460 | 2.41954459  | -5.21088390 |
| H  | -1.97955630 | 3.30639085  | -5.84656838 |
| H  | -1.08341094 | 1.82866699  | -5.42689663 |
| H  | -2.86183994 | 1.82096988  | -5.42470151 |
| Au | -1.97492039 | 3.67546694  | -0.78864487 |

62.

|    |             |             |            |
|----|-------------|-------------|------------|
| N  | 1.75605736  | -0.82116718 | 0.00120003 |
| C  | 2.90702846  | -0.82116928 | 0.00119813 |
| I  | -2.77250104 | -0.82116208 | 0.00120503 |
| N  | 4.21531886  | -0.82117298 | 0.00119593 |
| H  | 4.72339596  | 0.04607562  | 0.00119513 |
| H  | 4.72338886  | -1.68842808 | 0.00118803 |
| Au | -0.25795354 | -0.82116348 | 0.00120373 |
| N  | -0.25794413 | 1.16342284  | 3.14497250 |
| C  | -0.25794201 | 2.31434322  | 3.15577742 |
| I  | -0.25794928 | -3.36493599 | 3.10245751 |
| N  | -0.25793829 | 3.62257597  | 3.16805917 |

|    |             |             |            |
|----|-------------|-------------|------------|
| H  | -1.12514869 | 4.13070711  | 3.16468952 |
| H  | 0.60927868  | 4.13054722  | 3.18096108 |
| Au | -0.25794787 | -0.85049932 | 3.12606603 |

**63.**

|    |             |             |             |
|----|-------------|-------------|-------------|
| N  | 2.29840673  | 0.17734839  | 0.22967992  |
| C  | 3.44487763  | 0.20244709  | 0.25290202  |
| I  | -2.23719767 | 0.17374669  | 0.22626222  |
| O  | 4.71921523  | 0.16512729  | 0.21825852  |
| H  | 5.11578303  | 0.81371169  | 0.81930052  |
| Au | 0.27510723  | 0.17129879  | 0.22404762  |
| N  | 0.28382143  | 0.68041666  | -3.45320522 |
| C  | 0.31799685  | -0.18665740 | -4.20325811 |
| I  | 0.27886126  | 4.10793433  | -0.48271200 |
| O  | 0.26710606  | -1.14847566 | -5.03922763 |
| H  | 1.15086772  | -1.46755902 | -5.27656780 |
| Au | 0.27556107  | 2.20953515  | -2.12823820 |

**64.**

|    |             |             |             |
|----|-------------|-------------|-------------|
| Au | 1.17755124  | -2.67946743 | -0.00000027 |
| N  | 3.18005824  | -2.67947003 | -0.00000267 |
| C  | 4.32042054  | -2.67947173 | -0.00000427 |
| H  | 5.39021474  | -2.67947513 | -0.00000747 |
| C  | -0.76660716 | -2.67946673 | 0.00000043  |
| N  | -1.92188456 | -2.67946663 | 0.00000043  |
| Au | 1.17755537  | 0.48303257  | -0.00000054 |
| N  | 1.17755297  | 0.48303240  | -2.00250754 |
| C  | 1.17755137  | 0.48303209  | -3.14286984 |
| H  | 1.17754817  | 0.48302999  | -4.21266404 |
| C  | 1.17755607  | 0.48303090  | 1.94415786  |
| N  | 1.17755607  | 0.48302960  | 3.09943526  |

**65.**

|    |             |             |             |
|----|-------------|-------------|-------------|
| Au | 1.18369732  | -3.16492148 | 0.00000009  |
| N  | 3.20607062  | -3.16492488 | -0.00000301 |
| C  | 4.34830282  | -3.16492658 | -0.00000461 |
| C  | -0.75711918 | -3.16492058 | 0.00000089  |
| N  | -1.91236908 | -3.16492058 | 0.00000099  |
| F  | 5.59216502  | -3.16492928 | -0.00000711 |
| Au | 1.18370261  | -0.01492148 | -0.00000127 |
| N  | 1.18369951  | -0.01492232 | -2.02237457 |
| C  | 1.18369791  | -0.01492258 | -3.16460677 |
| C  | 1.18370341  | -0.01492304 | 1.94081523  |
| N  | 1.18370351  | -0.01492450 | 3.09606513  |
| F  | 1.18369541  | -0.01492370 | -4.40846897 |

**66.**

|    |             |             |             |
|----|-------------|-------------|-------------|
| Au | 1.23505397  | -2.39948925 | 0.01264748  |
| N  | 3.23173297  | -2.39952205 | 0.01253578  |
| C  | 4.37359777  | -2.39950215 | 0.01227658  |
| C  | -0.70931233 | -2.39943975 | 0.01264188  |
| N  | -1.86444393 | -2.39941665 | 0.01263038  |
| C  | 5.86604517  | -2.39946245 | 0.01247398  |
| F  | 6.30455667  | -1.18163225 | -0.24873562 |
| F  | 6.30406607  | -2.78205095 | 1.19794158  |
| F  | 6.30483477  | -3.23466875 | -0.91137952 |
| Au | 1.23506731  | 0.69147421  | -0.65619566 |
| N  | 1.23495120  | 0.26919278  | -2.60770928 |
| C  | 1.23470207  | 0.02777493  | -3.72376154 |
| C  | 1.23507230  | 1.10273236  | 1.24417984  |
| N  | 1.23506595  | 1.34705301  | 2.37317782  |
| C  | 1.23490340  | -0.28786233 | -5.18245012 |
| F  | 1.23716891  | 0.83675113  | -5.87445635 |
| F  | 2.31263842  | -0.99102469 | -5.47845625 |
| F  | 0.15530571  | -0.98753775 | -5.47999725 |

**67.**

|    |             |             |             |
|----|-------------|-------------|-------------|
| Au | 1.26416596  | -2.69540268 | 0.37109154  |
| N  | 3.25668146  | -2.69541008 | 0.37108464  |
| C  | 4.40045306  | -2.69539848 | 0.37109554  |
| C  | -0.67953924 | -2.69540338 | 0.37109094  |
| N  | -1.83474754 | -2.69540368 | 0.37109064  |
| N  | 5.82526676  | -2.69545468 | 0.37104334  |
| O  | 6.33268066  | -1.89692808 | 1.11123544  |
| O  | 6.33271306  | -3.49387038 | -0.36904606 |
| Au | 1.26416615  | -0.52107868 | -1.90812218 |
| N  | 1.26415604  | -1.96278302 | -3.28347909 |
| C  | 1.26417195  | -2.79037017 | -4.07298082 |
| C  | 1.26416523  | 0.88530837  | -0.56645704 |
| N  | 1.26416481  | 1.72117075  | 0.23093892  |
| N  | 1.26409526  | -3.82130889 | -5.05647430 |
| O  | 2.35280327  | -4.17767214 | -5.41802381 |
| O  | 0.17553838  | -4.19925621 | -5.39544546 |

**68.**

|    |             |             |             |
|----|-------------|-------------|-------------|
| Au | 1.24175434  | -2.58195606 | 0.04637123  |
| N  | 3.24870394  | -2.58195936 | 0.04636803  |
| C  | 4.39264504  | -2.58196096 | 0.04636573  |
| C  | -0.70198996 | -2.58195466 | 0.04637193  |
| N  | -1.85756366 | -2.58195446 | 0.04637193  |
| C  | 5.83482114  | -2.58196616 | 0.04636053  |
| H  | 6.20259054  | -1.57752856 | -0.16918267 |
| H  | 6.20258834  | -2.89752176 | 1.02400053  |
| H  | 6.20258044  | -3.27085306 | -0.71573837 |
| Au | 1.24175853  | 0.52337856  | -0.55221305 |
| N  | 1.24175476  | 0.14351186  | -2.52288501 |
| C  | 1.24175220  | -0.07300798 | -3.64614829 |
| C  | 1.24175948  | 0.89128075  | 1.35639636  |
| N  | 1.24175952  | 1.11000143  | 2.49108215  |
| C  | 1.24174611  | -0.34597900 | -5.06225518 |
| H  | 1.22021601  | 0.59292495  | -5.61777650 |
| H  | 2.14198664  | -0.90153852 | -5.32970354 |
| H  | 0.36303270  | -0.93815338 | -5.32263766 |

69.

|    |             |             |             |
|----|-------------|-------------|-------------|
| Au | 1.24890151  | -2.95950501 | 0.66590291  |
| N  | 3.25911011  | -2.95950861 | 0.66589951  |
| C  | 4.40935701  | -2.95951011 | 0.66589811  |
| C  | -0.69368479 | -2.95950341 | 0.66590441  |
| N  | -1.84945789 | -2.95950331 | 0.66590451  |
| N  | 5.71584231  | -2.95951571 | 0.66589311  |
| H  | 6.22379791  | -3.59585731 | 0.07603781  |
| H  | 6.22380851  | -2.32317451 | 1.25574771  |
| Au | 1.24890145  | -0.79949435 | -1.66110783 |
| N  | 1.24889650  | -2.27280994 | -3.02868957 |
| C  | 1.24889445  | -3.11584519 | -3.81122359 |
| C  | 1.24890364  | 0.62425974  | -0.33953081 |
| N  | 1.24890379  | 1.47134524  | 0.44676278  |
| N  | 1.24888694  | -4.07339029 | -4.70004934 |
| H  | 0.38121215  | -4.44608768 | -5.04518106 |
| H  | 2.11656097  | -4.44527887 | -5.04606799 |

70.

|    |             |             |             |
|----|-------------|-------------|-------------|
| Au | 1.21339808  | -1.73559285 | -0.59608879 |
| N  | 3.23108851  | -1.72998660 | -0.58442434 |
| C  | 4.37680573  | -1.70996886 | -0.56224681 |
| C  | -0.72810682 | -1.73811995 | -0.59845839 |
| N  | -1.88351612 | -1.73446185 | -0.59508609 |
| O  | 5.64819216  | -1.75386094 | -0.59889288 |
| H  | 6.05421413  | -1.10865171 | 0.00010457  |
| Au | 1.20683313  | -3.98917643 | 1.62263251  |
| N  | 1.19459778  | -2.57022364 | 3.05708901  |
| C  | 1.16475815  | -1.76368817 | 3.87082769  |
| C  | 1.21028599  | -5.35425730 | 0.24205453  |
| N  | 1.20531200  | -6.16639059 | -0.57977890 |
| O  | 1.22166552  | -0.87175189 | 4.77686528  |
| H  | 0.34224829  | -0.55626184 | 5.03578242  |

71.

|    |             |             |             |
|----|-------------|-------------|-------------|
| Cl | -1.00691230 | -2.34833937 | -0.26598595 |
| N  | 3.27108860  | -2.34820997 | -0.26593185 |
| C  | 3.95423550  | -3.49885877 | -0.22559135 |
| C  | 3.95417780  | -1.19754607 | -0.30626875 |
| C  | 5.33430410  | -3.53805077 | -0.22430185 |
| H  | 3.36329610  | -4.40424937 | -0.19379475 |
| C  | 5.33424110  | -1.15827417 | -0.30771985 |
| H  | 3.36319330  | -0.29217007 | -0.33797825 |
| C  | 6.04106530  | -2.34815347 | -0.26611425 |
| H  | 5.83837420  | -4.49507167 | -0.19072255 |
| H  | 5.83826470  | -0.20123367 | -0.34125445 |
| H  | 7.12427380  | -2.34812187 | -0.26628535 |
| Au | 1.22556600  | -2.34827107 | -0.26596235 |
| Cl | 1.22558560  | -4.50012704 | 2.85372362  |
| N  | 1.22545766  | -0.22358126 | 2.74215369  |
| C  | 2.37676697  | 0.45960281  | 2.73466318  |
| C  | 0.07413334  | 0.45900570  | 2.71399852  |
| C  | 2.41597926  | 1.83920849  | 2.69892012  |
| H  | 3.28267871  | -0.13092169 | 2.75826950  |
| C  | 0.03483696  | 1.83858795  | 2.67756109  |
| H  | -0.83176154 | -0.13198901 | 2.72131921  |
| C  | 1.22539642  | 2.54544758  | 2.66969492  |
| H  | 3.37355023  | 2.34333205  | 2.69439034  |
| H  | -0.92275243 | 2.34221604  | 2.65583152  |
| H  | 1.22536037  | 3.62828282  | 2.64126023  |
| Au | 1.22551794  | -2.26840821 | 2.79549615  |

72.

|    |             |             |             |
|----|-------------|-------------|-------------|
| Cl | -1.00797779 | -2.37417052 | -0.59387490 |
| N  | 3.27179451  | -2.37404372 | -0.59381010 |
| C  | 3.95644411  | -3.52399492 | -0.55349820 |

|    |             |             |             |
|----|-------------|-------------|-------------|
| C  | 3.95638881  | -1.22407402 | -0.63412670 |
| C  | 5.33450951  | -3.57318842 | -0.55188280 |
| H  | 3.36799011  | -4.43103012 | -0.52162970 |
| C  | 5.33446221  | -1.17481482 | -0.63594950 |
| H  | 3.36790891  | -0.31705592 | -0.66587930 |
| C  | 6.01778511  | -2.37400312 | -0.59405560 |
| H  | 5.86144501  | -4.51701162 | -0.51876500 |
| H  | 5.86135401  | -0.23098132 | -0.66902470 |
| Au | 1.22339021  | -2.37409962 | -0.59384250 |
| F  | 7.34048841  | -2.37397222 | -0.59432720 |
| Cl | 1.22340601  | -4.43265056 | 2.59943333  |
| N  | 1.22328297  | -0.15937964 | 2.36362273  |
| C  | 2.37370884  | 0.52295667  | 2.30283314  |
| C  | 0.07283837  | 0.52544647  | 2.34894196  |
| C  | 2.42291663  | 1.89886694  | 2.22578523  |
| H  | 3.28112240  | -0.06560269 | 2.31715337  |
| C  | 0.02355355  | 1.90147440  | 2.27388049  |
| H  | -0.83455174 | -0.06113279 | 2.39960375  |
| C  | 1.22322891  | 2.58242361  | 2.21203331  |
| H  | 3.36713117  | 2.42395874  | 2.17785238  |
| H  | -0.92066892 | 2.42861044  | 2.26377406  |
| Au | 1.22333700  | -2.20467228 | 2.47648637  |
| F  | 1.22318310  | 3.90310152  | 2.13886266  |

73.

|    |             |             |             |
|----|-------------|-------------|-------------|
| Cl | -0.99502541 | -2.34263603 | -0.01959045 |
| N  | 3.27857069  | -2.34177963 | -0.03477645 |
| C  | 3.96138579  | -3.49210323 | 0.01215235  |
| C  | 3.96060669  | -1.19065763 | -0.06784005 |
| C  | 5.34051009  | -3.53243243 | 0.03008785  |
| H  | 3.37210029  | -4.39849023 | 0.03850965  |
| C  | 5.33991119  | -1.14807153 | -0.05284915 |
| H  | 3.37062129  | -0.28503683 | -0.10444935 |
| C  | 6.04183939  | -2.33963473 | -0.00118145 |
| H  | 5.85153219  | -4.48469463 | 0.07595475  |
| H  | 5.85009919  | -0.19452103 | -0.07341365 |
| Au | 1.23424409  | -2.34239423 | -0.03159875 |
| C  | 7.54836439  | -2.34199893 | -0.02124595 |
| F  | 8.04334399  | -3.38892803 | 0.64060175  |
| F  | 8.00193919  | -2.40789963 | -1.27771015 |
| F  | 8.04669269  | -1.23432613 | 0.52919005  |
| Cl | 1.22912707  | -0.14863881 | -3.11116863 |
| N  | 1.23014609  | -4.42206554 | -3.07020671 |
| C  | 0.07941114  | -5.10435970 | -3.02585678 |
| C  | 2.38154355  | -5.10432249 | -3.08275687 |
| C  | 0.03890731  | -6.48313484 | -2.99021243 |
| H  | -0.82719613 | -4.51490049 | -3.01633810 |
| C  | 2.42398039  | -6.48330536 | -3.04922241 |
| H  | 3.28748469  | -4.51474732 | -3.11802454 |
| C  | 1.23196042  | -7.18465427 | -3.00029694 |
| H  | -0.91376596 | -6.99363819 | -2.94719364 |
| H  | 3.37769047  | -6.99359148 | -3.05351488 |
| Au | 1.22949471  | -2.37787367 | -3.09388954 |
| C  | 1.22980130  | -8.69131315 | -3.00059296 |
| F  | 0.17628483  | -9.17769709 | -2.34283810 |
| F  | 1.17651290  | -9.16136151 | -4.25158863 |
| F  | 2.33189622  | -9.18221973 | -2.43257234 |

74.

|    |             |             |             |
|----|-------------|-------------|-------------|
| Cl | -0.95802222 | -2.38732133 | -1.12790999 |
| N  | 3.31062518  | -2.38720893 | -1.12779479 |
| C  | 3.99046978  | -3.54068013 | -1.08732569 |
| C  | 3.99044338  | -1.23364633 | -1.16831039 |
| C  | 5.36991098  | -3.58719623 | -1.08593469 |
| H  | 3.39883308  | -4.44530253 | -1.05546199 |
| C  | 5.37001828  | -1.18724643 | -1.17011249 |
| H  | 3.39892188  | -0.32908543 | -1.20000539 |
| C  | 6.04749028  | -2.38724283 | -1.12824739 |
| H  | 5.90333658  | -4.52644753 | -1.05302649 |
| H  | 5.90338508  | -0.24800263 | -1.20310979 |
| Au | 1.26887478  | -2.38721953 | -1.12784539 |
| N  | 7.52102158  | -2.38745423 | -1.12893209 |
| O  | 8.06749808  | -3.46435983 | -1.09256389 |
| O  | 8.06775478  | -1.31039193 | -1.16591679 |
| Cl | 1.26889709  | -4.48717713 | 2.03519000  |
| N  | 1.26878946  | -0.22206298 | 1.86154698  |
| C  | 2.42295229  | 0.45695512  | 1.82741728  |
| C  | 0.11453343  | 0.45745300  | 1.84028657  |
| C  | 2.46948648  | 1.83523255  | 1.77076384  |
| H  | 3.32812219  | -0.13439235 | 1.84656326  |
| C  | 0.06809863  | 1.83588792  | 1.78421440  |
| H  | -0.79056817 | -0.13337029 | 1.86946899  |
| C  | 1.26880494  | 2.51251517  | 1.74968498  |
| H  | 3.40929912  | 2.36800002  | 1.74374827  |
| H  | -0.87171014 | 2.36902499  | 1.76771511  |

|    |            |             |            |
|----|------------|-------------|------------|
| Au | 1.26879800 | -2.26212313 | 1.94460898 |
| N  | 1.26898833 | 3.98479692  | 1.68901021 |
| O  | 2.34648212 | 4.53051739  | 1.65932571 |
| O  | 0.19131289 | 4.53135522  | 1.67358462 |

75.

|    |             |             |             |
|----|-------------|-------------|-------------|
| Cl | -1.00904268 | -2.33659765 | 0.15536216  |
| N  | 3.26986522  | -2.33677135 | 0.14364586  |
| C  | 3.95906092  | -3.48343435 | 0.18925736  |
| C  | 3.95881232  | -1.18967355 | 0.10884376  |
| C  | 5.33700552  | -3.51884705 | 0.20292996  |
| H  | 3.37274662  | -4.39211225 | 0.21874136  |
| C  | 5.33685292  | -1.15316485 | 0.11999986  |
| H  | 3.37236022  | -0.28123295 | 0.07462476  |
| C  | 6.06671602  | -2.33568905 | 0.16729806  |
| H  | 5.83797252  | -4.47837695 | 0.24532426  |
| H  | 5.83768932  | -0.19296195 | 0.09507706  |
| Au | 1.22467972  | -2.33680735 | 0.14689366  |
| C  | 7.55893682  | -2.33632225 | 0.15689236  |
| H  | 7.95957652  | -3.19728505 | 0.69315276  |
| H  | 7.92780522  | -2.38853645 | -0.87194534 |
| H  | 7.96014422  | -1.42639295 | 0.60424146  |
| Cl | 1.21977170  | -0.20030329 | -2.97938913 |
| N  | 1.21995861  | -4.47726419 | -2.84979165 |
| C  | 0.07244678  | -5.16571168 | -2.81567708 |
| C  | 2.36758583  | -5.16585055 | -2.82758255 |
| C  | 0.03664517  | -6.54248837 | -2.75756914 |
| H  | -0.83670779 | -4.57964204 | -2.83269615 |
| C  | 2.40374869  | -6.54273516 | -2.76983960 |
| H  | 3.27664159  | -4.57995001 | -2.85403050 |
| C  | 1.22034139  | -7.27180764 | -2.73376695 |
| H  | -0.92372140 | -7.04273107 | -2.72730137 |
| H  | 3.36426891  | -7.04317204 | -2.74954938 |
| Au | 1.21982052  | -2.43308706 | -2.91408868 |
| C  | 1.22002286  | -8.76355863 | -2.69490189 |
| H  | 0.34343614  | -9.14712913 | -2.17162976 |
| H  | 1.19854611  | -9.16623872 | -3.71209642 |
| H  | 2.11619321  | -9.14888114 | -2.20759786 |

76.

|    |             |             |             |
|----|-------------|-------------|-------------|
| Cl | -0.98775482 | -2.37361787 | -1.07324269 |
| N  | 3.29457828  | -2.37349467 | -1.07317169 |
| C  | 3.99238898  | -3.51780617 | -1.03309769 |
| C  | 3.99241398  | -1.22916387 | -1.11327739 |
| C  | 5.36344068  | -3.56490697 | -1.03162429 |
| H  | 3.41021718  | -4.42923087 | -1.00102929 |
| C  | 5.36346388  | -1.18211277 | -1.11506899 |
| H  | 3.41023338  | -0.31775197 | -1.14514089 |
| C  | 6.09912148  | -2.37350027 | -1.07356469 |
| H  | 5.86213918  | -4.52565647 | -0.99788809 |
| H  | 5.86215278  | -0.22131607 | -1.14872509 |
| Au | 1.24868418  | -2.37352867 | -1.07320189 |
| N  | 7.44896928  | -2.37364767 | -1.07382609 |
| H  | 7.96505748  | -3.23230657 | -1.04491639 |
| H  | 7.96527848  | -1.51512467 | -1.10446789 |
| Cl | 1.24872540  | -4.51706096 | 2.05502089  |
| N  | 1.24860439  | -0.23665611 | 1.92652552  |
| C  | 2.39360301  | 0.46101220  | 1.91130712  |
| C  | 0.10358552  | 0.46069190  | 1.89981085  |
| C  | 2.44072681  | 1.83144763  | 1.87020357  |
| H  | 3.30557949  | -0.12075552 | 1.93350148  |
| C  | 0.05650185  | 1.83111233  | 1.85826791  |
| H  | -0.80837202 | -0.12136176 | 1.91277858  |
| C  | 1.24859820  | 2.56661100  | 1.84193092  |
| H  | 3.40205593  | 2.33006859  | 1.86013415  |
| H  | -0.90487204 | 2.32943159  | 1.83847385  |
| Au | 1.24863746  | -2.28162885 | 1.98791893  |
| N  | 1.24873769  | 3.91584231  | 1.80113838  |
| H  | 2.10787738  | 4.43179222  | 1.78878532  |
| H  | 0.38968189  | 4.43177229  | 1.78076079  |

77.

|    |             |             |             |
|----|-------------|-------------|-------------|
| Cl | -1.00560360 | -2.37451439 | -1.21077432 |
| N  | 3.27504610  | -2.37802059 | -1.21053532 |
| C  | 3.95881970  | -3.52700219 | -1.17028272 |
| C  | 3.97337150  | -1.23362479 | -1.25064462 |
| C  | 5.33455370  | -3.57958459 | -1.16861092 |
| H  | 3.36986740  | -4.43383019 | -1.13839942 |
| C  | 5.34717460  | -1.19278239 | -1.25221942 |
| H  | 3.39119640  | -0.32245109 | -1.28252582 |
| C  | 6.05403100  | -2.39002909 | -1.21052632 |
| H  | 5.83363100  | -4.54106669 | -1.13485582 |
| H  | 5.87231170  | -0.24785729 | -1.28534932 |
| Au | 1.22797600  | -2.37317049 | -1.21076052 |
| O  | 7.39010180  | -2.33619039 | -1.21290202 |

|    |             |             |             |
|----|-------------|-------------|-------------|
| H  | 7.76149020  | -3.22383259 | -1.18248442 |
| Cl | 1.22918397  | -4.52072901 | 1.91270976  |
| N  | 1.23269547  | -0.24173579 | 1.79363455  |
| C  | 2.38235170  | 0.44200482  | 1.78292717  |
| C  | 0.08762725  | 0.45608694  | 1.76586619  |
| C  | 2.43496025  | 1.81721108  | 1.74482405  |
| H  | 3.28971532  | -0.14653255 | 1.80602263  |
| C  | 0.04675687  | 1.82934489  | 1.72716542  |
| H  | -0.82408034 | -0.12604539 | 1.77550950  |
| C  | 1.24469959  | 2.53616213  | 1.71591515  |
| H  | 3.39700886  | 2.31629111  | 1.73797136  |
| H  | -0.89872377 | 2.35408657  | 1.70565883  |
| Au | 1.22784098  | -2.28801437 | 1.85055532  |
| O  | 1.19081569  | 3.87169017  | 1.67782561  |
| H  | 2.07896022  | 4.24309502  | 1.67324330  |

**78.**

|    |             |             |             |
|----|-------------|-------------|-------------|
| Cl | -1.00560360 | -2.37451439 | -1.21077432 |
| N  | 3.27504610  | -2.37802059 | -1.21053532 |
| C  | 3.95881970  | -3.52700219 | -1.17028272 |
| C  | 3.97337150  | -1.23362479 | -1.25064462 |
| C  | 5.33455370  | -3.57958459 | -1.16861092 |
| H  | 3.36986740  | -4.43383019 | -1.13839942 |
| C  | 5.34717460  | -1.19278239 | -1.25221942 |
| H  | 3.39119640  | -0.32245109 | -1.28252582 |
| C  | 6.05403100  | -2.39002909 | -1.21052632 |
| H  | 5.83363100  | -4.54106669 | -1.13485582 |
| H  | 5.87231170  | -0.24785729 | -1.28534932 |
| Au | 1.22797600  | -2.37317049 | -1.21076052 |
| O  | 7.39010180  | -2.33619039 | -1.21290202 |
| H  | 7.76149020  | -3.22383259 | -1.18248442 |
| Cl | 1.22918397  | -4.52072901 | 1.91270976  |
| N  | 1.23269547  | -0.24173579 | 1.79363455  |
| C  | 2.38235170  | 0.44200482  | 1.78292717  |
| C  | 0.08762725  | 0.45608694  | 1.76586619  |
| C  | 2.43496025  | 1.81721108  | 1.74482405  |
| H  | 3.28971532  | -0.14653255 | 1.80602263  |
| C  | 0.04675687  | 1.82934489  | 1.72716542  |
| H  | -0.82408034 | -0.12604539 | 1.77550950  |
| C  | 1.24469959  | 2.53616213  | 1.71591515  |
| H  | 3.39700886  | 2.31629111  | 1.73797136  |
| H  | -0.89872377 | 2.35408657  | 1.70565883  |
| Au | 1.22784098  | -2.28801437 | 1.85055532  |
| O  | 1.19081569  | 3.87169017  | 1.67782561  |
| H  | 2.07896022  | 4.24309502  | 1.67324330  |

**79.**

|    |             |             |             |
|----|-------------|-------------|-------------|
| N  | 3.26063797  | -2.31481753 | 0.66615382  |
| C  | 3.94399267  | -3.46465443 | 0.70644062  |
| C  | 3.94390397  | -1.16487143 | 0.62581742  |
| C  | 5.32182327  | -3.51472153 | 0.70807272  |
| H  | 3.35539167  | -4.37209503 | 0.73833922  |
| C  | 5.32181067  | -1.11477753 | 0.62395102  |
| H  | 3.35531627  | -0.25750743 | 0.59406992  |
| C  | 6.00451427  | -2.31475373 | 0.66590092  |
| H  | 5.84961897  | -4.45797383 | 0.74114962  |
| H  | 5.84952647  | -0.17153663 | 0.59087342  |
| Au | 1.18442387  | -2.31484773 | 0.66611722  |
| C  | -0.75846333 | -2.31489903 | 0.66607852  |
| N  | -1.91430903 | -2.31492413 | 0.66607822  |
| F  | 7.32595107  | -2.31471533 | 0.66569512  |
| N  | 1.18450855  | -4.51157125 | -2.32398242 |
| C  | 0.03397897  | -5.19460312 | -2.30228653 |
| C  | 2.33514922  | -5.19408423 | -2.29146213 |
| C  | -0.01611344 | -6.57136149 | -2.24793871 |
| H  | -0.87401245 | -4.60663260 | -2.32984282 |
| C  | 2.38527772  | -6.57089939 | -2.23662689 |
| H  | 3.24305809  | -4.60578845 | -2.31049804 |
| C  | 1.18458235  | -7.25329381 | -2.21528740 |
| H  | -0.95993509 | -7.09891710 | -2.23141435 |
| H  | 3.32908801  | -7.09802301 | -2.21124356 |
| Au | 1.18447983  | -2.43699584 | -2.40645578 |
| C  | 1.18443011  | -0.49564231 | -2.48363836 |
| N  | 1.18440504  | 0.65929190  | -2.52953225 |
| F  | 1.18462890  | -8.57369670 | -2.16302400 |

**80.**

|   |            |             |            |
|---|------------|-------------|------------|
| N | 3.27044065 | -2.33581200 | 0.12950776 |
| C | 3.95116355 | -3.48604140 | 0.17659216 |
| C | 3.95044795 | -1.18489900 | 0.09672666 |
| C | 5.33049145 | -3.52739360 | 0.19473246 |
| H | 3.36161385 | -4.39290760 | 0.20273046 |
| C | 5.33003735 | -1.14142490 | 0.11185666 |
| H | 3.36035375 | -0.27873040 | 0.05995116 |
| C | 6.03056285 | -2.33382010 | 0.16328716 |

|    |             |             |             |
|----|-------------|-------------|-------------|
| H  | 5.84239555  | -4.47914870 | 0.24066876  |
| H  | 5.84119925  | -0.18842180 | 0.09149586  |
| Au | 1.19548345  | -2.33644350 | 0.13154046  |
| C  | -0.74735675 | -2.33669310 | 0.13960286  |
| N  | -1.90308255 | -2.33666120 | 0.14545536  |
| C  | 7.53827565  | -2.33629130 | 0.14269376  |
| F  | 7.98823155  | -2.40255860 | -1.11442594 |
| F  | 8.03565525  | -1.22856490 | 0.69249736  |
| F  | 8.03216635  | -3.38304810 | 0.80444946  |
| N  | 1.19321991  | -4.52950435 | -2.86037462 |
| C  | 0.04203287  | -5.20955118 | -2.82983006 |
| C  | 2.34454849  | -5.20853384 | -2.82233902 |
| C  | 0.00002328  | -6.58712116 | -2.75827104 |
| H  | -0.86517254 | -4.62080242 | -2.86163573 |
| C  | 2.38741834  | -6.58635660 | -2.75055852 |
| H  | 3.25145941  | -4.61900238 | -2.84823087 |
| C  | 1.19393095  | -7.28608093 | -2.71648364 |
| H  | -0.95278904 | -7.09822866 | -2.72807961 |
| H  | 3.34050807  | -7.09647979 | -2.71436099 |
| Au | 1.19250978  | -2.45611817 | -2.94112843 |
| C  | 1.19195256  | -0.51450297 | -3.01057773 |
| N  | 1.19176124  | 0.64053650  | -3.05082891 |
| C  | 1.19224451  | -8.79341853 | -2.67700455 |
| F  | 1.17373594  | -9.29322070 | -3.91678551 |
| F  | 2.27830701  | -9.26681148 | -2.06618903 |
| F  | 0.12112716  | -9.26212668 | -2.03624818 |

### 81.

|    |             |             |             |
|----|-------------|-------------|-------------|
| N  | 3.28676164  | -2.33377510 | 0.25108548  |
| C  | 3.96401294  | -3.48701910 | 0.29154528  |
| C  | 3.96404824  | -1.18064980 | 0.21057418  |
| C  | 5.34411224  | -3.53440150 | 0.29296208  |
| H  | 3.37227944  | -4.39214940 | 0.32343798  |
| C  | 5.34415804  | -1.13322210 | 0.20873348  |
| H  | 3.37234274  | -0.27545200 | 0.17885778  |
| C  | 6.01954484  | -2.33390990 | 0.25063178  |
| H  | 5.87950594  | -4.47228570 | 0.32581628  |
| H  | 5.87956184  | -0.19541070 | 0.17577958  |
| Au | 1.21215014  | -2.33383650 | 0.25102568  |
| C  | -0.73051126 | -2.33391270 | 0.25096858  |
| N  | -1.88613996 | -2.33395090 | 0.25097298  |
| N  | 7.49554634  | -2.33400510 | 0.24997228  |
| O  | 8.04046244  | -3.41110940 | 0.28632608  |
| O  | 8.04064284  | -1.25690810 | 0.21303988  |
| N  | 1.21230103  | -4.49885694 | -2.76100429 |
| C  | 0.05836395  | -5.17562740 | -2.73475585 |
| C  | 2.36612101  | -5.17602970 | -2.74711965 |
| C  | 0.01096037  | -6.55511892 | -2.69380186 |
| H  | -0.84731442 | -4.58400693 | -2.74734391 |
| C  | 2.41358247  | -6.55554469 | -2.70660265 |
| H  | 3.27186160  | -4.58472686 | -2.76946513 |
| C  | 1.21217978  | -7.23045066 | -2.68038211 |
| H  | -0.92748600 | -7.09012983 | -2.67296160 |
| H  | 3.35195903  | -7.09086291 | -2.69577498 |
| Au | 1.21224144  | -2.42516056 | -2.82261791 |
| C  | 1.21216697  | -0.48335614 | -2.88031443 |
| N  | 1.21212865  | 0.67176392  | -2.91459774 |
| N  | 1.21210423  | -8.70582203 | -2.63725208 |
| O  | 0.13441025  | -9.25037015 | -2.61676934 |
| O  | 2.28982311  | -9.25082381 | -2.62597290 |

### 82.

|    |             |             |             |
|----|-------------|-------------|-------------|
| N  | 3.26112581  | -2.33610555 | 0.33178792  |
| C  | 3.94890931  | -3.48305195 | 0.37448662  |
| C  | 3.94869201  | -1.18907765 | 0.29406802  |
| C  | 5.32687991  | -3.51957895 | 0.38403652  |
| H  | 3.36243841  | -4.39212955 | 0.40627052  |
| C  | 5.32669731  | -1.15172785 | 0.30102992  |
| H  | 3.36208471  | -0.27998025 | 0.26210282  |
| C  | 6.05543241  | -2.33531645 | 0.34844802  |
| H  | 5.83026671  | -4.47798625 | 0.42435322  |
| H  | 5.83002101  | -0.19277915 | 0.27412212  |
| Au | 1.18868921  | -2.33612655 | 0.33566302  |
| C  | -0.75488899 | -2.33604535 | 0.33865512  |
| N  | -1.91081949 | -2.33601065 | 0.33920272  |
| C  | 7.54755471  | -2.33570055 | 0.34342032  |
| H  | 7.94571751  | -3.19671135 | 0.88138962  |
| H  | 7.92135391  | -2.38784205 | -0.68360858 |
| H  | 7.94634431  | -1.42554455 | 0.79248582  |
| N  | 1.18304643  | -4.45680298 | -2.69362969 |
| C  | 0.03561796  | -5.14401040 | -2.65478086 |
| C  | 2.33049167  | -5.14464153 | -2.70314978 |
| C  | -0.00103404 | -6.52160511 | -2.62134697 |
| H  | -0.87381693 | -4.55729671 | -2.64608267 |
| C  | 2.36774541  | -6.52229823 | -2.67127101 |



|    |             |             |             |
|----|-------------|-------------|-------------|
| H  | 3.23994479  | -4.55846408 | -2.73279788 |
| C  | 1.18361254  | -7.25037647 | -2.62749061 |
| H  | -0.95990917 | -7.02443962 | -2.58551145 |
| H  | 3.32697814  | -7.02577892 | -2.67587003 |
| Au | 1.18296407  | -2.38462262 | -2.72644763 |
| C  | 1.18299668  | -0.44129606 | -2.75786551 |
| N  | 1.18301969  | 0.71446296  | -2.77778291 |
| C  | 1.18330391  | -8.74235400 | -2.60610490 |
| H  | 0.31486506  | -9.13114670 | -2.07324621 |
| H  | 1.14551256  | -9.13428904 | -3.62698279 |
| H  | 2.08710077  | -9.13290311 | -2.13738372 |

**83.**

|    |             |             |             |
|----|-------------|-------------|-------------|
| N  | 3.26942515  | -2.32354503 | 0.52354042  |
| C  | 3.96679355  | -3.46799813 | 0.56361032  |
| C  | 3.96684235  | -1.17925953 | 0.48343012  |
| C  | 5.33718835  | -3.51610393 | 0.56511592  |
| H  | 3.38479065  | -4.38007623 | 0.59570332  |
| C  | 5.33717875  | -1.13106213 | 0.48159552  |
| H  | 3.38480495  | -0.26708413 | 0.45154872  |
| C  | 6.07245375  | -2.32364413 | 0.52315752  |
| H  | 5.83639065  | -4.47671533 | 0.59882752  |
| H  | 5.83641475  | -0.17049153 | 0.44794322  |
| Au | 1.19830525  | -2.32362853 | 0.52350502  |
| C  | -0.74583835 | -2.32369323 | 0.52346802  |
| N  | -1.90210145 | -2.32372733 | 0.52346672  |
| N  | 7.42084015  | -2.32375403 | 0.52294032  |
| H  | 7.93738185  | -3.18228553 | 0.55186272  |
| H  | 7.93757325  | -1.46526893 | 0.49223902  |
| N  | 1.19844421  | -4.49735688 | -2.47983772 |
| C  | 0.05329071  | -5.19428122 | -2.45491559 |
| C  | 2.34343157  | -5.19442586 | -2.45775424 |
| C  | 0.00516150  | -6.56390010 | -2.40880653 |
| H  | -0.85935095 | -4.61256662 | -2.47327648 |
| C  | 2.39166343  | -6.56398927 | -2.41173317 |
| H  | 3.25616333  | -4.61275543 | -2.47844637 |
| C  | 1.19835810  | -7.29880316 | -2.38566633 |
| H  | -0.95604044 | -7.06277605 | -2.39071543 |
| H  | 3.35282259  | -7.06298141 | -2.39608516 |
| Au | 1.19836195  | -2.42741705 | -2.54974293 |
| C  | 1.19829854  | -0.48438129 | -2.61536569 |
| N  | 1.19826450  | 0.67122364  | -2.65437345 |
| N  | 1.19825559  | -8.64642957 | -2.34040061 |
| H  | 0.33923706  | -9.16268023 | -2.32306297 |
| H  | 2.05728782  | -9.16292565 | -2.32466026 |

**84.**

|    |             |             |             |
|----|-------------|-------------|-------------|
| N  | 3.26351050  | -2.33073444 | 0.34228520  |
| C  | 3.94644380  | -3.47973064 | 0.38252480  |
| C  | 3.96116990  | -1.18637494 | 0.30216590  |
| C  | 5.32189400  | -3.53401304 | 0.38423770  |
| H  | 3.35780870  | -4.38731604 | 0.41444580  |
| C  | 5.33449200  | -1.14530664 | 0.30056410  |
| H  | 3.38011060  | -0.27394634 | 0.27025540  |
| C  | 6.04094390  | -2.34340654 | 0.34228640  |
| H  | 5.82047760  | -4.49566004 | 0.41798490  |
| H  | 5.86140970  | -0.20139774 | 0.26746380  |
| Au | 1.18943730  | -2.32537504 | 0.34203590  |
| C  | -0.75411830 | -2.32607554 | 0.34200620  |
| N  | -1.91013010 | -2.32842984 | 0.34208400  |
| O  | 7.37541660  | -2.28648574 | 0.33981510  |
| H  | 7.75273360  | -3.17169574 | 0.37021070  |
| N  | 1.18411980  | -4.52223672 | -2.64647608 |
| C  | 0.03443661  | -5.20486663 | -2.62516083 |
| C  | 2.32916524  | -5.21907128 | -2.61198804 |
| C  | -0.01987063 | -6.57920978 | -2.56998467 |
| H  | -0.87369696 | -4.61691050 | -2.65384024 |
| C  | 2.37026471  | -6.59126582 | -2.55634876 |
| H  | 3.24213760  | -4.63828286 | -2.63043819 |
| C  | 1.17145805  | -7.29741559 | -2.53458853 |
| H  | -0.98209540 | -7.07759646 | -2.55503021 |
| H  | 3.31473974  | -7.11754327 | -2.52987446 |
| Au | 1.18948490  | -2.44986389 | -2.73044315 |
| C  | 1.18878618  | -0.50790279 | -2.80915433 |
| N  | 1.18643066  | 0.64716130  | -2.85595423 |
| O  | 1.22843224  | -8.63080173 | -2.48074801 |
| H  | 0.34271750  | -9.00803141 | -2.47095403 |

## 7. Coordinates of the dimers 1 to 84 at their energetic minimum (PBE0-D4//def2-TZVP)

1.  
 Ag 0.73586603 -0.38433013 0.00000058  
 N 2.80515863 -0.38433323 -0.00000232  
 C 3.94608123 -0.38433513 -0.00000412  
 Cl -1.52726117 -0.38432983 0.00000088  
 H 5.01596113 -0.38433893 -0.00000762  
 Ag 0.73587059 2.65316987 -0.00000044  
 N 0.73586769 2.65316915 -2.06929304  
 C 0.73586589 2.65316856 -3.21021564  
 Cl 0.73587089 2.65316757 2.26312676  
 H 0.73586239 2.65316599 -4.28009554

2.  
 Ag 0.74433466 -0.87938554 0.00000177  
 N 2.83283976 -0.87938934 -0.00000173  
 C 3.97677626 -0.87939134 -0.00000363  
 F 5.22244266 -0.87939474 -0.00000683  
 Cl -1.52059714 -0.87938514 0.00000207  
 Ag 0.74434013 2.13311446 -0.00000120  
 N 0.74433663 2.13311238 -2.08850630  
 C 0.74433473 2.13311133 -3.23244280  
 F 0.74433153 2.13310895 -4.47810920  
 Cl 0.74434043 2.13311299 2.26493060

3.  
 Ag 0.77045421 1.65757624 -0.49995676  
 N 2.83543331 1.65770794 -0.49992436  
 C 3.97770091 1.65805404 -0.49995156  
 C 5.46928201 1.65779194 -0.49999556  
 F 5.91021881 2.79364064 -1.01059256  
 F 5.90967951 1.53187054 0.73909664  
 F 5.90923561 0.64743324 -1.22848286  
 Cl -1.48922249 1.65757564 -0.50000916  
 Ag 0.77061159 -1.11040298 0.72025470  
 N 0.77052882 -0.27744062 2.60978172  
 C 0.77041409 0.18356781 3.65488775  
 C 0.77056009 0.78496114 5.01985672  
 F 0.77953540 2.10232515 4.92107244  
 F -0.31242633 0.39973664 5.67093133  
 F 1.84473802 0.38537001 5.67677858  
 Cl 0.77065978 -2.02177520 -1.34748307

4.  
 Ag 0.78076180 -0.69582257 1.03907739  
 N 2.84012770 -0.69583257 1.03906649  
 C 3.98464260 -0.69582377 1.03907729  
 N 5.40873780 -0.69584477 1.03905349  
 O 5.91790740 -1.39721817 0.20647699  
 O 5.91791100 0.00556513 1.87167449  
 Cl -1.47534160 -0.69581697 1.03908399  
 Ag 0.78076257 1.60661577 -0.92291208  
 N 0.78074779 0.27092843 -2.49037093  
 C 0.78076172 -0.47139428 -3.36150315  
 N 0.78072998 -1.39505054 -4.44543408  
 O -0.30787936 -1.72060389 -4.83697802  
 O 1.86939688 -1.72998635 -4.82898762  
 Cl 0.78077123 3.06990493 0.79429128

5.  
 Ag 0.78342714 -0.48396373 -0.75735072  
 N 2.85187824 -0.48396973 -0.75735502  
 C 3.99650354 -0.48397043 -0.75735622  
 C 5.43988034 -0.48397213 -0.75736412  
 H 5.80845294 0.45262617 -1.17835482  
 H 5.80845444 -0.58768583 0.26425608  
 H 5.80844544 -1.31686773 -1.35798672  
 Cl -1.48377986 -0.48396013 -0.75734942  
 Ag 0.78343794 1.94405873 1.06778302  
 N 0.78343811 3.18692288 -0.58563122  
 C 0.78343757 3.87469277 -1.50058458  
 C 0.78343228 4.74196959 -2.65434691  
 H -0.11585551 5.35968011 -2.65110543  
 H 1.66238336 5.38784897 -2.62993274  
 H 0.80378110 4.14276496 -3.56585256  
 Cl 0.78343682 0.58176516 2.88006992

6.  
 Ag 0.80166312 0.50940667 1.10336733  
 N 2.87065552 0.50940357 1.10336313  
 C 4.02191782 0.50939587 1.10336123  
 N 5.33076092 0.50943417 1.10335923  
 H 5.83850212 1.37660007 1.10335823

|    |             |             |             |
|----|-------------|-------------|-------------|
| H  | 5.83851222  | -0.35784773 | 1.10335113  |
| Cl | -1.46786008 | 0.50940757  | 1.10336823  |
| Ag | 0.80165694  | 0.54852835  | -1.94638176 |
| N  | 0.80165379  | -1.52029384 | -1.97292030 |
| C  | 0.80164606  | -2.67146144 | -1.98768680 |
| N  | 0.80168433  | -3.98019687 | -2.00447492 |
| H  | 1.66877886  | -4.48775363 | -2.02211138 |
| H  | -0.06552630 | -4.48804900 | -1.99986954 |
| Cl | 0.80165785  | 2.81786489  | -1.91727473 |

7.

|    |             |             |             |
|----|-------------|-------------|-------------|
| Ag | 0.76789195  | -0.59786394 | 1.39734518  |
| N  | 2.84736385  | -0.59086954 | 1.40385968  |
| C  | 3.99416985  | -0.56137514 | 1.43121818  |
| O  | 5.26845465  | -0.59476284 | 1.40018648  |
| H  | 5.66330265  | 0.05362456  | 2.00207958  |
| Cl | -1.49967315 | -0.58757024 | 1.40687558  |
| Ag | 0.76899356  | 1.28198377  | -0.97263296 |
| N  | 0.77852178  | -0.34720966 | -2.26489173 |
| C  | 0.81863018  | -1.24737099 | -2.97544314 |
| O  | 0.77318934  | -2.24321266 | -3.77049908 |
| H  | 1.65519129  | -2.59534050 | -3.96198021 |
| Cl | 0.78298016  | 3.05735757  | 0.43800538  |

8.

|    |             |             |             |
|----|-------------|-------------|-------------|
| Ag | 1.16991375  | -2.34210073 | -0.08694775 |
| N  | 3.25648265  | -2.34210393 | -0.08695075 |
| C  | 4.39739595  | -2.34210573 | -0.08695245 |
| H  | 5.46735135  | -2.34210943 | -0.08695585 |
| Br | -1.21984765 | -2.34210043 | -0.08694745 |
| Ag | 1.16991816  | -2.31735405 | 2.93795103  |
| N  | 1.16992133  | -0.23087265 | 2.91884297  |
| C  | 1.16992312  | 0.90999281  | 2.90839483  |
| H  | 1.16992679  | 1.97990333  | 2.89859467  |
| Br | 1.16991787  | -4.70701528 | 2.95983246  |

9.

|    |             |             |             |
|----|-------------|-------------|-------------|
| Ag | -0.49011197 | -1.24160374 | 0.00000004  |
| N  | 1.61544073  | -1.24160774 | -0.00000376 |
| C  | 2.75950253  | -1.24160964 | -0.00000556 |
| Br | -2.88132877 | -1.24160334 | 0.00000034  |
| F  | 4.00507943  | -1.24161274 | -0.00000846 |
| Ag | -0.49010627 | 1.75839626  | -0.00000123 |
| N  | -0.49011007 | 1.75839536  | -2.10555393 |
| C  | -0.49011187 | 1.75839515  | -3.24961573 |
| Br | -0.49010597 | 1.75839313  | 2.39121557  |
| F  | -0.49011477 | 1.75839389  | -4.49519263 |

10.

|    |             |             |             |
|----|-------------|-------------|-------------|
| Ag | 0.45572518  | -1.07529061 | -0.13633721 |
| N  | 2.53862068  | -1.07533931 | -0.13644291 |
| C  | 3.68086458  | -1.07531941 | -0.13673371 |
| Br | -1.93053932 | -1.07522241 | -0.13635551 |
| C  | 5.17269098  | -1.07528181 | -0.13656281 |
| F  | 5.61319858  | -1.91048091 | -1.06040361 |
| F  | 5.61244398  | -1.45786881 | 1.04890799  |
| F  | 5.61292828  | 0.14254339  | -0.39776571 |
| Ag | 0.45576035  | 1.86367852  | -0.79786324 |
| N  | 0.45564654  | 1.40628777  | -2.82991820 |
| C  | 0.45536721  | 1.15555244  | -3.94430275 |
| Br | 0.45575748  | 2.38772886  | 1.53014653  |
| C  | 0.45554219  | 0.82797290  | -5.39971941 |
| F  | -0.62916056 | 0.13424923  | -5.69510679 |
| F  | 1.52805624  | 0.11329112  | -5.68961615 |
| F  | 0.46815617  | 1.94636606  | -6.10269287 |

11.

|    |             |             |             |
|----|-------------|-------------|-------------|
| Ag | 0.05159014  | -0.77581401 | -0.25036728 |
| N  | 2.12838484  | -0.77578661 | -0.25037168 |
| C  | 3.27294174  | -0.77582221 | -0.25037318 |
| Br | -2.33082436 | -0.77583931 | -0.25036618 |
| N  | 4.69692944  | -0.77583081 | -0.25037778 |
| O  | 5.20621894  | -1.86456681 | -0.25038408 |
| O  | 5.20622604  | 0.31289459  | -0.25037508 |
| Ag | 0.05159690  | -0.80403926 | 2.76200049  |
| N  | 0.05156955  | 1.27266428  | 2.78145875  |
| C  | 0.05160516  | 2.41717093  | 2.79218393  |
| Br | 0.05162219  | -3.18634915 | 2.73967476  |
| N  | 0.05161380  | 3.84109614  | 2.80552447  |
| O  | 1.14030210  | 4.35026776  | 2.82048892  |
| O  | -1.03706386 | 4.35046592  | 2.80010232  |

12.

|    |             |             |             |
|----|-------------|-------------|-------------|
| Ag | -0.11177952 | -0.35541299 | -0.05513012 |
| N  | 1.97166468  | -0.35541669 | -0.05513342 |

|    |             |             |             |
|----|-------------|-------------|-------------|
| C  | 3.11632978  | -0.35541919 | -0.05513672 |
| Br | -2.50553312 | -0.35541289 | -0.05513092 |
| C  | 4.55978828  | -0.35542509 | -0.05514322 |
| H  | 4.92819968  | 0.64861881  | -0.27060102 |
| H  | 4.92819768  | -0.67085659 | 0.92211448  |
| H  | 4.92818958  | -1.04404109 | -0.81694192 |
| Ag | -0.11177524 | 2.60348825  | -0.68404065 |
| N  | -0.11177924 | 2.17033122  | -2.72195986 |
| C  | -0.11178299 | 1.93235026  | -3.84161305 |
| Br | -0.11177600 | 3.10115691  | 1.65740809  |
| C  | -0.11179057 | 1.63224668  | -5.25353028 |
| H  | -0.11379394 | 2.56011388  | -5.82738708 |
| H  | 0.77853295  | 1.05511816  | -5.50750239 |
| H  | -1.00011030 | 1.05172539  | -5.50677299 |

13.

|    |             |             |             |
|----|-------------|-------------|-------------|
| Ag | -0.18056846 | -0.59293706 | -0.44774720 |
| N  | 1.90270254  | -0.59294176 | -0.44775160 |
| C  | 3.05406314  | -0.59293986 | -0.44775350 |
| Br | -2.57664126 | -0.59293596 | -0.44774640 |
| N  | 4.36284624  | -0.59298246 | -0.44775530 |
| H  | 4.87053964  | 0.27433314  | -0.44775640 |
| H  | 4.87051584  | -1.46020056 | -0.44776350 |
| Ag | -0.18056199 | -0.56629854 | 2.57713551  |
| N  | -0.18055733 | 1.51689169  | 2.55878998  |
| C  | -0.18055925 | 2.66820765  | 2.54865154  |
| Br | -0.18056309 | -2.96227847 | 2.59823131  |
| N  | -0.18051667 | 3.97694001  | 2.53712685  |
| H  | -1.04779863 | 4.48468098  | 2.54029526  |
| H  | 0.68666772  | 4.48452261  | 2.52501076  |

14.

|    |             |             |             |
|----|-------------|-------------|-------------|
| Ag | -0.07751117 | -0.09962542 | 0.28030044  |
| N  | 2.01692093  | -0.09238952 | 0.28702554  |
| C  | 3.16389573  | -0.06300852 | 0.31422024  |
| Br | -2.47130607 | -0.08896022 | 0.29015284  |
| O  | 4.43807633  | -0.09614892 | 0.28348024  |
| H  | 4.83294823  | 0.55301448  | 0.88483134  |
| Ag | -0.07646137 | 1.78258873  | -2.07181033 |
| N  | -0.06660985 | 0.14728804  | -3.38041187 |
| C  | -0.02667922 | -0.74980774 | -4.09509969 |
| Br | -0.06197902 | 3.65045715  | -0.57470555 |
| O  | -0.07175979 | -1.74232020 | -4.89414049 |
| H  | 0.81079914  | -2.09069493 | -5.09082513 |

15.

|    |             |             |             |
|----|-------------|-------------|-------------|
| Ag | 1.14979197  | -2.59573824 | 0.00000045  |
| N  | 3.26054507  | -2.59574174 | -0.00000285 |
| C  | 4.40150237  | -2.59574334 | -0.00000435 |
| H  | 5.47154867  | -2.59574684 | -0.00000765 |
| I  | -1.40209083 | -2.59573794 | 0.00000065  |
| Ag | 1.14979697  | 0.41676176  | -0.00000011 |
| N  | 1.14979367  | 0.41676136  | -2.11075321 |
| C  | 1.14979217  | 0.41676143  | -3.25171051 |
| H  | 1.14978887  | 0.41675950  | -4.32175681 |
| I  | 1.14979717  | 0.41675832  | 2.55188269  |

16.

|    |             |             |             |
|----|-------------|-------------|-------------|
| Ag | 0.22355935  | -1.34948151 | 0.00000004  |
| N  | 2.35339425  | -1.34948571 | -0.00000396 |
| C  | 3.49768205  | -1.34948741 | -0.00000566 |
| I  | -2.32916335 | -1.34948101 | 0.00000044  |
| F  | 4.74334985  | -1.34949031 | -0.00000826 |
| Ag | 0.22356521  | 1.63801849  | -0.00000093 |
| N  | 0.22356121  | 1.63801777  | -2.12983583 |
| C  | 0.22355951  | 1.63801794  | -3.27412363 |
| I  | 0.22356561  | 1.63801481  | 2.55272177  |
| F  | 0.22355691  | 1.63801708  | -4.51979143 |

17.

|    |             |             |             |
|----|-------------|-------------|-------------|
| Ag | 0.34394513  | 0.78359864  | -0.07795274 |
| N  | 2.45279953  | 0.78352584  | -0.07800794 |
| C  | 3.59507913  | 0.78324544  | -0.07811744 |
| I  | -2.20478307 | 0.78357524  | -0.07792954 |
| C  | 5.08701263  | 0.78337594  | -0.07804654 |
| F  | 5.52757713  | -0.11413136 | -0.94143054 |
| F  | 5.52699763  | 0.48451264  | 1.13118046  |
| F  | 5.52673633  | 1.98015494  | -0.42369904 |
| Ag | 0.34402247  | 3.67224500  | -0.93286704 |
| N  | 0.34394888  | 3.07377535  | -2.95501959 |
| C  | 0.34376430  | 2.74940909  | -4.05027722 |
| I  | 0.34403807  | 4.39545541  | 1.51110148  |
| C  | 0.34386932  | 2.32615221  | -5.48091316 |
| F  | -0.73873665 | 1.61087774  | -5.72869350 |
| F  | 1.41855080  | 1.59741845  | -5.72410617 |

F 0.35209240 3.39583763 -6.25603770

18.

Ag -0.37833232 -0.07149832 -0.19697620  
N 1.72232948 -0.07148782 -0.19698080  
C 2.86712738 -0.07152462 -0.19698230  
I -2.92268472 -0.07150402 -0.19697500  
N 4.29025138 -0.07154682 -0.19698660  
O 4.80010558 -1.16054522 -0.19699290  
O 4.80003988 1.01751658 -0.19698390  
Ag -0.37832563 -0.09569131 2.80292625  
N -0.37833609 2.00490218 2.81986669  
C -0.37829928 3.14966284 2.82910007  
I -0.37831994 -2.63996094 2.78240332  
N -0.37827705 4.57274057 2.84057567  
O 0.71068601 5.08250742 2.85346148  
O -1.46730508 5.08258329 2.83591076

19.

Ag 0.11177002 -0.28049487 0.08357388  
N 2.21689772 -0.28049777 0.08357088  
C 3.36166062 -0.28050237 0.08356718  
I -2.44381358 -0.28049657 0.08357268  
C 4.80518222 -0.28050667 0.08356258  
H 5.17359102 0.70603973 -0.20142372  
H 5.17359162 -0.52697967 1.08043038  
H 5.17358352 -1.02058957 -0.62832542  
Ag 0.11177283 2.61923555 -0.73295519  
N 0.11176916 2.04864703 -2.75927978  
C 0.11176435 1.73836023 -3.86118913  
I 0.11177122 3.31191522 1.72696400  
C 0.11175876 1.34709657 -5.25067369  
H 0.10484200 2.23566250 -5.88361822  
H 1.00450368 0.75879075 -5.46775110  
H -0.77407824 0.74726392 -5.46449688

20.

Ag 0.01719569 -0.47647672 -0.54663323  
N 2.12089709 -0.47648152 -0.54663783  
C 3.27243609 -0.47647922 -0.54663953  
I -2.54042401 -0.47647602 -0.54663243  
N 4.58127789 -0.47650682 -0.54664123  
H 5.08900209 0.39077018 -0.54664243  
H 5.08898609 -1.34373272 -0.54664953  
Ag 0.01720229 -0.48054046 2.46586403  
N 0.01720709 1.62315903 2.46870185  
C 0.01720480 2.77469698 2.47025604  
I 0.01720159 -3.03815782 2.46240911  
N 0.01723240 4.08353759 2.47202281  
H -0.85004381 4.59126290 2.47153959  
H 0.88445752 4.59124376 2.47386846

21.

Ag -0.31856891 -0.76259561 0.45921488  
N 1.79766789 -0.75418451 0.46703608  
C 2.94486169 -0.72584621 0.49326648  
I -2.87426961 -0.75097191 0.46995098  
O 4.21899489 -0.75840931 0.46304288  
H 4.61204139 -0.10885871 1.06497068  
Ag -0.31628399 0.95175867 -2.00269173  
N -0.30491211 -0.78490641 -3.21201186  
C -0.26667069 -1.72890185 -3.86389752  
I -0.30061314 3.04669803 -0.53884748  
O -0.31065899 -2.77038350 -4.59790722  
H 0.56626454 -3.16337974 -4.72151020

22.

Ag 0.70834879 -0.57045602 -0.01676630  
C -1.29652421 -0.57045542 -0.01676580  
N -2.45269311 -0.57045542 -0.01676570  
N 2.79171459 -0.57045922 -0.01676930  
C 3.93187499 -0.57046072 -0.01677070  
H 5.00224239 -0.57046372 -0.01677350  
Ag 0.70835359 2.50418293 0.03035373  
C 0.70835408 2.47345855 2.03499130  
N 0.70835418 2.45574008 3.19102442  
N 0.70835064 2.53610759 -2.05276745  
C 0.70834926 2.55357921 -3.19279398  
H 0.70834650 2.56997971 -4.26303572

23.

Ag 0.72568512 0.28324311 0.00000014  
C -1.27871278 0.28324381 0.00000074  
N -2.43486328 0.28324381 0.00000074  
N 2.82399172 0.28323911 -0.00000356

|    |            |            |             |
|----|------------|------------|-------------|
| C  | 3.96746152 | 0.28323751 | -0.00000506 |
| F  | 5.21137422 | 0.28323521 | -0.00000726 |
| Ag | 0.72569103 | 3.38324311 | -0.00000174 |
| C  | 0.72569177 | 3.45265677 | 2.00319388  |
| N  | 0.72569184 | 3.49269466 | 3.15865090  |
| N  | 0.72568719 | 3.31057404 | -2.09704962 |
| C  | 0.72568562 | 3.27097370 | -3.23983350 |
| F  | 0.72568334 | 3.22789429 | -4.48300001 |

**24.**

|    |            |             |             |
|----|------------|-------------|-------------|
| Ag | 4.03570393 | 0.01753695  | 0.05480566  |
| C  | 2.03104923 | 0.01752384  | 0.05470377  |
| N  | 0.87501273 | 0.01751377  | 0.05465870  |
| N  | 6.11840363 | 0.01769725  | 0.05484446  |
| C  | 7.25974343 | 0.01811795  | 0.05481346  |
| C  | 8.75411023 | 0.01779005  | 0.05475436  |
| F  | 9.19176883 | 1.15364355  | -0.45588884 |
| F  | 9.19113363 | -0.10821145 | 1.29392176  |
| F  | 9.19056343 | -0.99272175 | -0.67380394 |
| Ag | 4.03551235 | 2.81074277  | -1.20094411 |
| C  | 4.03541404 | 3.63273286  | 0.62743571  |
| N  | 4.03536881 | 4.10674771  | 1.68182193  |
| N  | 4.03559894 | 1.95692502  | -3.10058442 |
| C  | 4.03559410 | 1.48932813  | -4.14174237 |
| C  | 4.03556932 | 0.87629772  | -5.50457983 |
| F  | 3.52487446 | 1.73279712  | -6.36948689 |
| F  | 5.27475359 | 0.58225661  | -5.85151476 |
| F  | 3.30707593 | -0.22436374 | -5.48831859 |

**25.**

|    |             |             |             |
|----|-------------|-------------|-------------|
| Ag | 0.74580695  | 0.33244808  | 0.16117131  |
| C  | -1.25853165 | 0.33245358  | 0.16117761  |
| N  | -2.41456455 | 0.33245388  | 0.16117791  |
| N  | 2.82796255  | 0.33243238  | 0.16115341  |
| C  | 3.97109595  | 0.33244278  | 0.16116621  |
| N  | 5.40033795  | 0.33244338  | 0.16116791  |
| O  | 5.90589175  | -0.36890542 | -0.67137939 |
| O  | 5.90591235  | 1.03379158  | 0.99371561  |
| Ag | 0.74580762  | 2.66398909  | -1.80514924 |
| C  | 0.74581598  | 3.95617646  | -0.27295310 |
| N  | 0.74581641  | 4.70146523  | 0.61076445  |
| N  | 0.74578382  | 1.32163323  | -3.39683159 |
| C  | 0.74580031  | 0.58466050  | -4.27068808 |
| N  | 0.74580199  | -0.33676529 | -5.36325716 |
| O  | -0.34278645 | -0.66223415 | -5.75010988 |
| O  | 1.83439035  | -0.66316637 | -5.74935064 |

**26.**

|    |             |             |             |
|----|-------------|-------------|-------------|
| Ag | 0.75032791  | 0.14087902  | -0.00000027 |
| C  | -1.25479879 | 0.14088312  | 0.00000123  |
| N  | -2.41121569 | 0.14088372  | 0.00000133  |
| N  | 2.82903331  | 0.14087342  | -0.00000417 |
| C  | 3.97328981  | 0.14087362  | -0.00000607 |
| C  | 5.41620271  | 0.14087132  | -0.00001117 |
| H  | 5.78385061  | 1.07776882  | -0.42113717 |
| H  | 5.78385151  | 0.03712642  | 1.02193063  |
| H  | 5.78384401  | -0.69228698 | -0.60082597 |
| Ag | 0.75033617  | 3.21587902  | -0.00000191 |
| C  | 0.75033728  | 3.07539410  | 2.00019736  |
| N  | 0.75033715  | 2.99437046  | 3.15377233  |
| N  | 0.75033267  | 3.36151772  | -2.07359914 |
| C  | 0.75033099  | 3.44169014  | -3.21504355 |
| C  | 0.75032617  | 3.54278540  | -4.65441055 |
| H  | 0.32920337  | 4.50314103  | -4.95551128 |
| H  | 1.77226770  | 3.46505131  | -5.02842475 |
| H  | 0.14950866  | 2.73743540  | -5.07952347 |

**27.**

|    |             |             |             |
|----|-------------|-------------|-------------|
| Ag | 0.78082690  | 0.59446709  | 0.57560100  |
| C  | -1.22409446 | 0.59408435  | 0.57562365  |
| N  | -2.38063454 | 0.59386275  | 0.57563613  |
| N  | 2.85777417  | 0.59486069  | 0.57557452  |
| C  | 4.00887365  | 0.59508083  | 0.57556080  |
| N  | 5.31637492  | 0.59531674  | 0.57554570  |
| H  | 5.82398248  | 1.46286159  | 0.56352339  |
| H  | 5.82430375  | -0.27201016 | 0.58754720  |
| Ag | 0.73805693  | 0.40128941  | -2.50555290 |
| C  | 0.73767349  | 2.40228197  | -2.63100595 |
| N  | 0.73745151  | 3.55655567  | -2.70337424 |
| N  | 0.73845142  | -1.67158810 | -2.37559615 |
| C  | 0.73867200  | -2.82043195 | -2.30356961 |
| N  | 0.73890840  | -4.12537113 | -2.22175691 |
| H  | 1.60600817  | -4.63008941 | -2.15977720 |
| H  | -0.12797263 | -4.63419971 | -2.22020004 |

**28.**

|    |             |             |             |
|----|-------------|-------------|-------------|
| Ag | 0.74939081  | -0.30585694 | 0.68663808  |
| C  | -1.25529899 | -0.30946714 | 0.68331118  |
| N  | -2.41145589 | -0.31016854 | 0.68266978  |
| N  | 2.82444521  | -0.30915824 | 0.68354818  |
| C  | 3.96957871  | -0.30283464 | 0.68942898  |
| C  | 5.44811151  | -0.30580684 | 0.68671738  |
| O  | 6.06144761  | 0.44220436  | 1.38108018  |
| H  | 5.89865451  | -1.04214624 | 0.00323628  |
| Ag | 0.74939843  | 2.06983065  | -1.26572804 |
| C  | 0.74453595  | 3.34263998  | 0.28305796  |
| N  | 0.74359507  | 4.07689995  | 1.17612072  |
| N  | 0.74491349  | 0.75234576  | -2.86887640 |
| C  | 0.75347091  | 0.02642338  | -3.75452235 |
| C  | 0.74948768  | -0.91244041 | -4.89671076 |
| O  | 1.76086340  | -1.19582785 | -5.45764957 |
| H  | -0.24607128 | -1.30266412 | -5.15923490 |

**29.**

|    |             |             |             |
|----|-------------|-------------|-------------|
| Ag | 0.74939081  | -0.30585694 | 0.68663808  |
| C  | -1.25529899 | -0.30946714 | 0.68331118  |
| N  | -2.41145589 | -0.31016854 | 0.68266978  |
| N  | 2.82444521  | -0.30915824 | 0.68354818  |
| C  | 3.96957871  | -0.30283464 | 0.68942898  |
| C  | 5.44811151  | -0.30580684 | 0.68671738  |
| O  | 6.06144761  | 0.44220436  | 1.38108018  |
| H  | 5.89865451  | -1.04214624 | 0.00323628  |
| Ag | 0.74939843  | 2.06983065  | -1.26572804 |
| C  | 0.74453595  | 3.34263998  | 0.28305796  |
| N  | 0.74359507  | 4.07689995  | 1.17612072  |
| N  | 0.74491349  | 0.75234576  | -2.86887640 |
| C  | 0.75347091  | 0.02642338  | -3.75452235 |
| C  | 0.74948768  | -0.91244041 | -4.89671076 |
| O  | 1.76086340  | -1.19582785 | -5.45764957 |
| H  | -0.24607128 | -1.30266412 | -5.15923490 |

**30.**

|    |             |             |             |
|----|-------------|-------------|-------------|
| Ag | 0.70594776  | 0.48272433  | -1.50854761 |
| N  | 2.83557766  | 0.48278343  | -1.50849081 |
| C  | 3.52122886  | -0.66332007 | -1.46829451 |
| C  | 3.52118366  | 1.62895113  | -1.54865891 |
| C  | 4.90033516  | -0.71674777 | -1.46651081 |
| H  | 2.93800946  | -1.57518247 | -1.43629911 |
| C  | 4.90028416  | 1.68238983  | -1.55060351 |
| H  | 2.93793276  | 2.54078413  | -1.58062011 |
| C  | 5.58298606  | 0.48285253  | -1.50873301 |
| H  | 5.42814126  | -1.66005167 | -1.43338521 |
| H  | 5.42802966  | 2.62575403  | -1.58363371 |
| F  | 6.90596616  | 0.48283953  | -1.50911091 |
| Cl | -1.56009714 | 0.48266573  | -1.50853511 |
| Ag | 0.70586760  | 0.56196668  | 1.41537880  |
| N  | 0.70581006  | 2.69081492  | 1.35768413  |
| C  | 1.85258162  | 3.37646245  | 1.34825014  |
| C  | -0.44102491 | 3.37592108  | 1.32996117  |
| C  | 1.90603802  | 4.75507068  | 1.31118737  |
| H  | 2.76497593  | 2.79365565  | 1.37136870  |
| C  | -0.49449667 | 4.75450087  | 1.29206416  |
| H  | -1.35338891 | 2.79268749  | 1.33850927  |
| C  | 0.70573443  | 5.43720636  | 1.28293753  |
| H  | 2.84989290  | 5.28288833  | 1.30445499  |
| H  | -1.43840924 | 5.28184924  | 1.27026820  |
| F  | 0.70573720  | 6.75968963  | 1.24668191  |
| Cl | 0.70592651  | -1.70324451 | 1.47684215  |

**31.**

|    |             |             |             |
|----|-------------|-------------|-------------|
| Ag | 0.70710770  | 0.51954190  | -0.08337466 |
| N  | 2.84052190  | 0.52014990  | -0.08756946 |
| C  | 3.52407510  | -0.62583160 | -0.04093926 |
| C  | 3.52321350  | 1.66700430  | -0.12068976 |
| C  | 4.90470310  | -0.67100730 | -0.02324746 |
| H  | 2.93976210  | -1.53700240 | -0.01428496 |
| C  | 4.90412020  | 1.71443470  | -0.10628556 |
| H  | 2.93825560  | 2.57732340  | -0.15737476 |
| C  | 5.60508670  | 0.52231880  | -0.05482566 |
| H  | 5.41656480  | -1.62291800 | 0.02296094  |
| H  | 5.41506950  | 2.66764670  | -0.12652866 |
| C  | 7.11240480  | 0.51998370  | -0.07402366 |
| F  | 7.61028400  | 1.62758820  | 0.47678814  |
| F  | 7.56645710  | 0.45424860  | -1.33019546 |
| F  | 7.60685750  | -0.52701820 | 0.58793634  |
| Cl | -1.55829510 | 0.51949950  | -0.07250806 |
| Ag | 0.71281765  | 0.64560870  | 2.83890177  |
| N  | 0.71202942  | 2.77704459  | 2.74695333  |
| C  | 1.85895074  | 3.45980691  | 2.71378627  |
| C  | -0.43515008 | 3.45992685  | 2.73742422  |

|    |             |             |            |
|----|-------------|-------------|------------|
| C  | 1.90488285  | 4.83990887  | 2.67259962 |
| H  | 2.77039500  | 2.87539194  | 2.72342172 |
| C  | -0.48187816 | 4.84034415  | 2.69711298 |
| H  | -1.34619986 | 2.87564737  | 2.76585325 |
| C  | 0.71134837  | 5.54061786  | 2.66597350 |
| H  | 2.85791075  | 5.35146828  | 2.65481202 |
| H  | -1.43503240 | 5.35179921  | 2.69878802 |
| C  | 0.71282197  | 7.04586575  | 2.58468082 |
| F  | -0.36884201 | 7.56802321  | 3.16383510 |
| F  | 0.72190145  | 7.44777328  | 1.30920441 |
| F  | 1.78858410  | 7.56516627  | 3.17793481 |
| Cl | 0.71334091  | -1.61742869 | 2.94296630 |

**32.**

|    |             |             |             |
|----|-------------|-------------|-------------|
| Ag | 0.71085702  | 0.57700564  | 1.31418573  |
| N  | 2.84520202  | 0.57708874  | 1.31426543  |
| C  | 3.52541702  | -0.57178066 | 1.35459413  |
| C  | 3.52544272  | 1.72587064  | 1.27397073  |
| C  | 4.90683712  | -0.62335276 | 1.35623963  |
| H  | 2.93956622  | -1.48165196 | 1.38656953  |
| C  | 4.90687952  | 1.77750114  | 1.27204833  |
| H  | 2.93959302  | 2.63578044  | 1.24204813  |
| C  | 5.58288122  | 0.57700134  | 1.31392913  |
| H  | 5.44107242  | -1.56225616 | 1.38915363  |
| H  | 5.44107842  | 2.71637224  | 1.23909653  |
| N  | 7.05875112  | 0.57684874  | 1.31317213  |
| O  | 7.60491492  | 1.65368024  | 1.27603403  |
| O  | 7.60467182  | -0.50003636 | 1.34961713  |
| Cl | -1.55263538 | 0.57692144  | 1.31418973  |
| Ag | 0.71097080  | 0.45831134  | -1.60840501 |
| N  | 0.71105060  | -1.67427565 | -1.52179489 |
| C  | -0.43850876 | -2.35418967 | -1.50058295 |
| C  | 1.86052116  | -2.35369767 | -1.48782303 |
| C  | -0.49010514 | -3.73449237 | -1.44502989 |
| H  | -1.34892797 | -1.76902353 | -1.52933770 |
| C  | 1.91218713  | -3.73399164 | -1.43164286 |
| H  | 2.77097668  | -1.76812436 | -1.50651521 |
| C  | 0.71097693  | -4.40971797 | -1.41114760 |
| H  | -1.42957061 | -4.26850130 | -1.42861711 |
| H  | 2.85162186  | -4.26754014 | -1.40477995 |
| N  | 0.71085521  | -5.88440547 | -1.35207720 |
| O  | 1.78830653  | -6.42985143 | -1.32330956 |
| O  | -0.36662151 | -6.43017438 | -1.33726545 |
| Cl | 0.71088650  | 2.71994295  | -1.70016730 |

**33.**

|    |             |             |             |
|----|-------------|-------------|-------------|
| Ag | 0.69989848  | 0.45250729  | -1.09296624 |
| N  | 2.82856288  | 0.45255359  | -1.09639934 |
| C  | 3.51938888  | -0.68994171 | -1.05083294 |
| C  | 3.51912218  | 1.59546029  | -1.13095344 |
| C  | 4.89860748  | -0.72998581 | -1.03695894 |
| H  | 2.93792468  | -1.60329601 | -1.02153454 |
| C  | 4.89844828  | 1.63663989  | -1.11993004 |
| H  | 2.93752428  | 2.50856709  | -1.16568354 |
| C  | 5.62772408  | 0.45365149  | -1.07283724 |
| H  | 5.40040088  | -1.68921381 | -0.99419104 |
| H  | 5.40007688  | 2.59659059  | -1.14445854 |
| C  | 7.12037168  | 0.45301219  | -1.08330904 |
| H  | 7.48938428  | 0.40079489  | -2.11209974 |
| H  | 7.52190298  | 1.36291659  | -0.63616424 |
| H  | 7.52129078  | -0.40796961 | -0.54726234 |
| Cl | -1.57011222 | 0.45277509  | -1.08498524 |
| Ag | 0.70462189  | 0.64348568  | 1.83831525  |
| N  | 0.70435249  | 2.76764935  | 1.69992248  |
| C  | 1.84734711  | 3.45513893  | 1.62553336  |
| C  | -0.43831542 | 3.45946364  | 1.69771191  |
| C  | 1.88823008  | 4.83229051  | 1.54923100  |
| H  | 2.76062273  | 2.87283795  | 1.63085443  |
| C  | -0.47866562 | 4.83688547  | 1.62396429  |
| H  | -1.35170895 | 2.88069836  | 1.76071469  |
| C  | 0.70483394  | 5.56267289  | 1.54596488  |
| H  | 2.84817761  | 5.33172548  | 1.49622604  |
| H  | -1.43811656 | 5.34001025  | 1.63155319  |
| C  | 0.70477806  | 7.05165145  | 1.44084702  |
| H  | 0.68834383  | 7.35461087  | 0.38953700  |
| H  | -0.17331585 | 7.48451081  | 1.92113415  |
| H  | 1.59955887  | 7.48203932  | 1.89196279  |
| Cl | 0.70488050  | -1.62145078 | 1.99022024  |

**34.**

|    |            |             |            |
|----|------------|-------------|------------|
| Ag | 0.71523378 | 0.56722092  | 1.07019322 |
| N  | 2.84051298 | 0.56727092  | 1.07023822 |
| C  | 3.54135388 | -0.57261788 | 1.11018362 |
| C  | 3.54134508 | 1.70722932  | 1.03030522 |
| C  | 4.91350328 | -0.62439748 | 1.11185462 |



|    |             |             |             |
|----|-------------|-------------|-------------|
| H  | 2.96497928  | -1.48927648 | 1.14240692  |
| C  | 4.91354108  | 1.75895562  | 1.02838722  |
| H  | 2.96497608  | 2.62380682  | 0.99822262  |
| C  | 5.64887858  | 0.56730032  | 1.06988552  |
| H  | 5.41237008  | -1.58537148 | 1.14562602  |
| H  | 5.41233638  | 2.71996702  | 0.99473702  |
| N  | 6.99901538  | 0.56718372  | 1.06955142  |
| H  | 7.51496968  | -0.29163718 | 1.09846682  |
| H  | 7.51521618  | 1.42563092  | 1.03901042  |
| Cl | -1.55790392 | 0.56714562  | 1.07018892  |
| Ag | 0.71529877  | 0.44765142  | -1.86487226 |
| N  | 0.71534690  | -1.67586641 | -1.77836383 |
| C  | -0.42522301 | -2.37639201 | -1.75635808 |
| C  | 1.85598584  | -2.37585279 | -1.74333094 |
| C  | -0.47702770 | -3.74742331 | -1.70097457 |
| H  | -1.34243343 | -1.80070351 | -1.78493795 |
| C  | 1.90774734  | -3.74690505 | -1.68731664 |
| H  | 2.77310950  | -1.79974642 | -1.76151029 |
| C  | 0.71539064  | -4.48192133 | -1.66446369 |
| H  | -1.43857980 | -4.24609655 | -1.68606882 |
| H  | 2.86933187  | -4.24506298 | -1.66151258 |
| N  | 0.71528774  | -5.83095417 | -1.60987517 |
| H  | -0.14399824 | -6.34672889 | -1.59496531 |
| H  | 1.57426654  | -6.34654675 | -1.58443259 |
| Cl | 0.71522371  | 2.71890695  | -1.95735632 |

**35.**

|    |             |             |             |
|----|-------------|-------------|-------------|
| Ag | 0.70742531  | 0.48335542  | -1.18211006 |
| N  | 2.83677091  | 0.47702042  | -1.18180556 |
| C  | 3.52237091  | -0.66805098 | -1.14171056 |
| C  | 3.53773731  | 1.61704912  | -1.22178086 |
| C  | 4.89935521  | -0.72544518 | -1.13989886 |
| H  | 2.93869751  | -1.57975648 | -1.10964406 |
| C  | 4.91270221  | 1.66186892  | -1.22352166 |
| H  | 2.96140381  | 2.53329532  | -1.25381776 |
| C  | 5.61869951  | 0.46426752  | -1.18181306 |
| H  | 5.39906471  | -1.68670278 | -1.10618396 |
| H  | 5.44012241  | 2.60563662  | -1.25663096 |
| O  | 6.95508281  | 0.51832372  | -1.18417526 |
| H  | 7.32661591  | -0.36915498 | -1.15369306 |
| Cl | -1.56245479 | 0.47860802  | -1.18200156 |
| Ag | 0.70733133  | 0.59225588  | 1.74086200  |
| N  | 0.71367327  | 2.72012519  | 1.66158471  |
| C  | 1.85944364  | 3.40515483  | 1.63351089  |
| C  | -0.42705343 | 3.42069643  | 1.63792294  |
| C  | 1.91686551  | 4.78117071  | 1.58187595  |
| H  | 2.77171097  | 2.82181711  | 1.65339158  |
| C  | -0.47190696 | 4.79470371  | 1.58661527  |
| H  | -1.34385722 | 2.84484028  | 1.66146597  |
| C  | 0.72641707  | 5.50010376  | 1.55744006  |
| H  | 2.87871196  | 5.28045617  | 1.56119063  |
| H  | -1.41625309 | 5.32183291  | 1.56898124  |
| O  | 0.67231041  | 6.83554590  | 1.50729286  |
| H  | 1.56030878  | 7.20672587  | 1.49089814  |
| Cl | 0.71207947  | -1.67605031 | 1.82537649  |

**36.**

|    |             |             |             |
|----|-------------|-------------|-------------|
| Ag | 0.69462153  | 0.52344678  | -0.01247469 |
| C  | -1.30807747 | 0.52339640  | -0.01250547 |
| N  | -2.46466407 | 0.52337552  | -0.01249749 |
| N  | 2.82946783  | 0.52350368  | -0.01243599 |
| C  | 3.51333563  | -0.62346782 | 0.02775031  |
| C  | 3.51327273  | 1.67051998  | -0.05267119 |
| C  | 4.89457533  | -0.66715152 | 0.02918561  |
| H  | 2.92650793  | -1.53326012 | 0.05971531  |
| C  | 4.89450563  | 1.71424798  | -0.05429059 |
| H  | 2.92640343  | 2.58027938  | -0.08451259 |
| C  | 5.60014153  | 0.52357438  | -0.01262139 |
| H  | 5.39989483  | -1.62347192 | 0.06270291  |
| H  | 5.39979453  | 2.67060468  | -0.08784239 |
| H  | 6.68363833  | 0.52361408  | -0.01271649 |
| Ag | 0.69456678  | 0.56300623  | 2.94976117  |
| C  | 0.69461674  | -1.43951414 | 2.97650866  |
| N  | 0.69463155  | -2.59599727 | 2.99197881  |
| N  | 0.69450902  | 2.69766219  | 2.92125371  |
| C  | 1.84191398  | 3.38180239  | 2.93699483  |
| C  | -0.45294227 | 3.38107177  | 2.88717594  |
| C  | 1.88561205  | 4.76293002  | 2.91937764  |
| H  | 2.75205202  | 2.79529291  | 2.96467020  |
| C  | -0.49668886 | 4.76216729  | 2.86767021  |
| H  | -1.36304500 | 2.79399083  | 2.87531825  |
| C  | 0.69443407  | 5.46808571  | 2.88402017  |
| H  | 2.84229404  | 5.26848258  | 2.93338057  |
| H  | -1.45340826 | 5.26713232  | 2.84011953  |
| H  | 0.69439241  | 6.55148437  | 2.86943723  |

## 37.

|    |             |             |             |
|----|-------------|-------------|-------------|
| Ag | 0.69312673  | 0.49002569  | -1.06344413 |
| C  | -1.30875247 | 0.48997179  | -1.06348023 |
| N  | -2.46526007 | 0.48995609  | -1.06347393 |
| N  | 2.82972853  | 0.49007609  | -1.06339703 |
| C  | 3.51546753  | -0.65620151 | -1.02323903 |
| C  | 3.51544183  | 1.63639649  | -1.10361173 |
| C  | 4.89453333  | -0.70982991 | -1.02148693 |
| H  | 2.93200563  | -1.56798311 | -0.99118203 |
| C  | 4.89445583  | 1.69007359  | -1.10560873 |
| H  | 2.93191233  | 2.54815939  | -1.13550243 |
| C  | 5.57693713  | 0.49012709  | -1.06365023 |
| H  | 5.42302123  | -1.65280871 | -0.98843593 |
| H  | 5.42294933  | 2.63306299  | -1.13869353 |
| F  | 6.89892253  | 0.49016839  | -1.06383823 |
| Ag | 0.69305927  | 0.58355678  | 1.89757903  |
| C  | 0.69311200  | -1.41732422 | 1.96078952  |
| N  | 0.69312789  | -2.57325427 | 1.99733452  |
| N  | 0.69301038  | 2.71909346  | 1.83012294  |
| C  | 1.83998432  | 3.40461569  | 1.81242963  |
| C  | -0.45400812 | 3.40433713  | 1.80443070  |
| C  | 1.89364130  | 4.78299489  | 1.76891810  |
| H  | 2.75232340  | 2.82154855  | 1.83413748  |
| C  | -0.50772150 | 4.78265312  | 1.76055913  |
| H  | -1.36632327 | 2.82100069  | 1.81975883  |
| C  | 0.69295142  | 5.46492263  | 1.74307509  |
| H  | 2.83719341  | 5.31132273  | 1.75550378  |
| H  | -1.45128528 | 5.31077795  | 1.74054528  |
| F  | 0.69290421  | 6.78624216  | 1.70112120  |

## 38.

|    |             |             |             |
|----|-------------|-------------|-------------|
| Ag | 0.69799328  | 0.51033510  | -0.18384499 |
| C  | -1.30326402 | 0.51012990  | -0.17563989 |
| N  | -2.45965622 | 0.51013730  | -0.17246219 |
| N  | 2.83591088  | 0.51097590  | -0.18768609 |
| C  | 3.51856368  | -0.63555390 | -0.14025949 |
| C  | 3.51790188  | 1.65821120  | -0.21990459 |
| C  | 4.89909368  | -0.68075510 | -0.12190169 |
| H  | 2.93406708  | -1.54670970 | -0.11393849 |
| C  | 4.89864558  | 1.70550110  | -0.20482789 |
| H  | 2.93286818  | 2.56868510  | -0.25683089 |
| C  | 5.59900638  | 0.51295240  | -0.15379779 |
| H  | 5.41093698  | -1.63262030 | -0.07537419 |
| H  | 5.40980358  | 2.65863900  | -0.22463679 |
| C  | 7.10703068  | 0.51049590  | -0.17412289 |
| F  | 7.60450178  | 1.61818910  | 0.37591841  |
| F  | 7.55798308  | 0.44436670  | -1.43091549 |
| F  | 7.60103978  | -0.53627730 | 0.48769591  |
| Ag | 0.70326011  | 0.72487491  | 2.78340457  |
| C  | 0.70406467  | -1.27084966 | 2.93233724  |
| N  | 0.70428843  | -2.42415390 | 3.01684937  |
| N  | 0.70234398  | 2.85722963  | 2.62923145  |
| C  | 1.84924649  | 3.53555592  | 2.54389221  |
| C  | -0.44413425 | 3.54123681  | 2.63375104  |
| C  | 1.89568476  | 4.91371846  | 2.46170513  |
| H  | 2.75985499  | 2.94961557  | 2.54404550  |
| C  | -0.49017672 | 4.91986334  | 2.55510119  |
| H  | -1.35484991 | 2.95979683  | 2.70527204  |
| C  | 0.70288521  | 5.61586724  | 2.46870952  |
| H  | 2.84838770  | 5.42260771  | 2.40183379  |
| H  | -1.44217171 | 5.43332197  | 2.56967930  |
| C  | 0.70383810  | 7.11871667  | 2.34222195  |
| F  | -0.36018934 | 7.65930448  | 2.93603807  |
| F  | 0.67693620  | 7.48003640  | 1.05537187  |
| F  | 1.79664732  | 7.65248870  | 2.88870039  |

## 39.

|    |             |             |             |
|----|-------------|-------------|-------------|
| Ag | 0.70033775  | 0.47635814  | -1.15076380 |
| C  | -1.30093365 | 0.47626694  | -1.15081580 |
| N  | -2.45728095 | 0.47624634  | -1.15080760 |
| N  | 2.84108875  | 0.47639904  | -1.15067870 |
| C  | 3.51990935  | -0.67317346 | -1.11035510 |
| C  | 3.51995335  | 1.62595354  | -1.19107530 |
| C  | 4.90138735  | -0.72443466 | -1.10880710 |
| H  | 2.93263275  | -1.58225576 | -1.07831870 |
| C  | 4.90146495  | 1.67710304  | -1.19304740 |
| H  | 2.93272625  | 2.53504794  | -1.22292730 |
| C  | 5.57636965  | 0.47634174  | -1.15113460 |
| H  | 5.43684725  | -1.66247776 | -1.07597030 |
| H  | 5.43694105  | 2.61514794  | -1.22602720 |
| N  | 7.05323645  | 0.47624464  | -1.15177670 |
| O  | 7.59831105  | 1.55318274  | -1.18869990 |
| O  | 7.59821445  | -0.60078446 | -1.11542920 |
| Ag | 0.70021774  | 0.59801818  | 1.80923706  |
| C  | 0.70030673  | -1.40156392 | 1.89144799  |

|   |             |             |            |
|---|-------------|-------------|------------|
| N | 0.70032765  | -2.55693351 | 1.93898947 |
| N | 0.70018037  | 2.73696326  | 1.72132352 |
| C | 1.85043934  | 3.41492755  | 1.68655198 |
| C | -0.45006360 | 3.41553355  | 1.70021086 |
| C | 1.90172089  | 4.79521498  | 1.62920747 |
| H | 2.76007059  | 2.82793003  | 1.70541094 |
| C | -0.50125094 | 4.79588268  | 1.64354877 |
| H | -1.35969937 | 2.82902773  | 1.72981699 |
| C | 0.70021893  | 5.46991333  | 1.60842642 |
| H | 2.84032140  | 5.32998899  | 1.60152583 |
| H | -1.43985911 | 5.33113359  | 1.62706460 |
| N | 0.70028960  | 6.94550526  | 1.54707164 |
| O | -0.37725661 | 7.49041883  | 1.53194959 |
| O | 1.77790312  | 7.48969912  | 1.51680626 |

40.

|    |             |             |             |
|----|-------------|-------------|-------------|
| Ag | 0.69334153  | 0.47416075  | -0.89303432 |
| C  | -1.30886537 | 0.47425465  | -0.89022872 |
| N  | -2.46544767 | 0.47424975  | -0.89073062 |
| N  | 2.82364593  | 0.47412765  | -0.89809432 |
| C  | 3.51362603  | -0.66920085 | -0.85513692 |
| C  | 3.51335613  | 1.61763425  | -0.93530642 |
| C  | 4.89256583  | -0.70920905 | -0.84479092 |
| H  | 2.93144403  | -1.58228185 | -0.82369622 |
| C  | 4.89241543  | 1.65854905  | -0.92779312 |
| H  | 2.93106723  | 2.53063055  | -0.96788892 |
| C  | 5.62124273  | 0.47498195  | -0.88020752 |
| H  | 5.39487903  | -1.66815455 | -0.80412212 |
| H  | 5.39459223  | 2.61800525  | -0.95438472 |
| C  | 7.11353623  | 0.47456795  | -0.88600612 |
| H  | 7.48582473  | 0.42239305  | -1.91356832 |
| H  | 7.51256073  | 1.38473565  | -0.43711522 |
| H  | 7.51192173  | -0.38649205 | -0.34819612 |
| Ag | 0.70039964  | 0.63859034  | 2.07740977  |
| C  | 0.70045634  | -1.36066447 | 2.18613216  |
| N  | 0.70042579  | -2.51565376 | 2.24681659  |
| N  | 0.70015302  | 2.76564440  | 1.95966681  |
| C  | 1.84406063  | 3.45343440  | 1.90018366  |
| C  | -0.44359346 | 3.45591673  | 1.95190008  |
| C  | 1.88460641  | 4.83086750  | 1.83524705  |
| H  | 2.75743255  | 2.87093880  | 1.90977114  |
| C  | -0.48399942 | 4.83356677  | 1.88879091  |
| H  | -1.35695319 | 2.87551145  | 2.00277181  |
| C  | 0.70034687  | 5.56027108  | 1.82955065  |
| H  | 2.84430459  | 5.33169577  | 1.79402296  |
| H  | -1.44339039 | 5.33656696  | 1.89093937  |
| C  | 0.70043436  | 7.05016745  | 1.74480124  |
| H  | 0.69329666  | 7.36750627  | 0.69768608  |
| H  | -0.18234417 | 7.47512104  | 2.22359697  |
| H  | 1.59106405  | 7.47376826  | 2.21032893  |

41.

|    |             |             |             |
|----|-------------|-------------|-------------|
| Ag | 0.70766928  | 0.52031906  | -1.30023924 |
| C  | -1.29565142 | 0.52024406  | -1.30027734 |
| N  | -2.45243552 | 0.52022266  | -1.30027414 |
| N  | 2.83411718  | 0.52036826  | -1.30018544 |
| C  | 3.53463128  | -0.62046474 | -1.26025664 |
| C  | 3.53465608  | 1.66116456  | -1.34018594 |
| C  | 4.90622608  | -0.67180444 | -1.25864644 |
| H  | 2.95793678  | -1.53717984 | -1.22800224 |
| C  | 4.90626998  | 1.71249476  | -1.34213944 |
| H  | 2.95797668  | 2.57790676  | -1.37221824 |
| C  | 5.64144328  | 0.52030476  | -1.30057864 |
| H  | 5.40681918  | -1.63169714 | -1.22498274 |
| H  | 5.40686058  | 2.67236776  | -1.37577964 |
| N  | 6.99036928  | 0.52022786  | -1.30075514 |
| H  | 7.50667288  | -0.33848624 | -1.27185984 |
| H  | 7.50681168  | 1.37882936  | -1.33155664 |
| Ag | 0.70759414  | 0.52789269  | 1.66225108  |
| C  | 0.70766904  | -1.47542144 | 1.66738507  |
| N  | 0.70769045  | -2.63220167 | 1.67037486  |
| N  | 0.70754508  | 2.65433364  | 1.65681483  |
| C  | 1.84847549  | 3.35494104  | 1.69204715  |
| C  | -0.43334881 | 3.35477438  | 1.61789340  |
| C  | 1.89981910  | 4.72653509  | 1.68998614  |
| H  | 2.76526929  | 2.77832574  | 1.72346996  |
| C  | -0.48468379 | 4.72637900  | 1.61252853  |
| H  | -1.35016916 | 2.77802019  | 1.58967060  |
| C  | 0.70760758  | 5.46164937  | 1.64917337  |
| H  | 2.85979393  | 5.22720716  | 1.71992756  |
| H  | -1.44463887 | 5.22688736  | 1.58002566  |
| N  | 0.70768404  | 6.81057041  | 1.64551395  |
| H  | 1.56646853  | 7.32694128  | 1.67090253  |
| H  | -0.15099267 | 7.32693718  | 1.61555250  |

|            |             |             |             |
|------------|-------------|-------------|-------------|
| <b>42.</b> |             |             |             |
| Ag         | 0.69864547  | 0.50460512  | -1.01362811 |
| C          | -1.30383253 | 0.50185642  | -1.01358921 |
| N          | -2.46046143 | 0.49977792  | -1.01351561 |
| N          | 2.83048277  | 0.49838612  | -1.01332791 |
| C          | 3.51588197  | -0.64725968 | -0.97322131 |
| C          | 3.53125517  | 1.63891892  | -1.05332801 |
| C          | 4.89242737  | -0.70496058 | -0.97140851 |
| H          | 2.93211527  | -1.55918988 | -0.94114351 |
| C          | 4.90578607  | 1.68338712  | -1.05506731 |
| H          | 2.95544057  | 2.55576112  | -1.08538031 |
| C          | 5.61170947  | 0.48526792  | -1.01334191 |
| H          | 5.39176037  | -1.66639758 | -0.93769231 |
| H          | 5.43356067  | 2.62697982  | -1.08817111 |
| O          | 6.94678037  | 0.54094052  | -1.01575841 |
| H          | 7.32182847  | -0.34526178 | -0.98528581 |
| Ag         | 0.69842026  | 0.57037214  | 1.94814178  |
| C          | 0.70116914  | -1.43160946 | 1.99272674  |
| N          | 0.70324875  | -2.58795074 | 2.01851921  |
| N          | 0.70464439  | 2.70168407  | 1.90081581  |
| C          | 1.85089710  | 3.38724178  | 1.90029502  |
| C          | -0.43649420 | 3.40195386  | 1.87045183  |
| C          | 1.90862399  | 4.76345754  | 1.87016697  |
| H          | 2.76331377  | 2.80388489  | 1.92519051  |
| C          | -0.48098999 | 4.77612686  | 1.83907812  |
| H          | -1.35382112 | 2.82602017  | 1.87152111  |
| C          | 0.71775909  | 5.48221387  | 1.83855751  |
| H          | 2.87057160  | 5.26294368  | 1.87147810  |
| H          | -1.42508411 | 5.30349830  | 1.81510472  |
| O          | 0.66204666  | 6.81692711  | 1.80763376  |
| H          | 1.54870622  | 7.19212403  | 1.81013550  |

|            |             |             |             |
|------------|-------------|-------------|-------------|
| <b>43.</b> |             |             |             |
| Cl         | -0.98180985 | -3.14134800 | 0.00000065  |
| Au         | 1.24014035  | -3.14134860 | 0.00000015  |
| N          | 3.20334965  | -3.14135110 | -0.00000225 |
| C          | 4.34536045  | -3.14135310 | -0.00000405 |
| H          | 5.41425065  | -3.14135720 | -0.00000785 |
| Cl         | 1.24014504  | 0.12114961  | 2.22194972  |
| Au         | 1.24014454  | 0.12115140  | -0.00000048 |
| N          | 1.24014214  | 0.12115102  | -1.96320978 |
| C          | 1.24014034  | 0.12115025  | -3.10522058 |
| H          | 1.24013654  | 0.12114730  | -4.17411078 |

|            |             |             |             |
|------------|-------------|-------------|-------------|
| <b>44.</b> |             |             |             |
| Cl         | -0.97565964 | -2.36638890 | 0.00000072  |
| Au         | 1.24679626  | -2.36638960 | 0.00000012  |
| N          | 3.23273986  | -2.36639280 | -0.00000288 |
| C          | 4.37577366  | -2.36639490 | -0.00000478 |
| F          | 5.62264616  | -2.36639860 | -0.00000828 |
| Cl         | 1.24680205  | 0.85860844  | 2.22245468  |
| Au         | 1.24680145  | 0.85861040  | -0.00000122 |
| N          | 1.24679845  | 0.85860958  | -1.98594482 |
| C          | 1.24679655  | 0.85860884  | -3.12897862 |
| F          | 1.24679305  | 0.85860664  | -4.37585112 |

|            |             |             |             |
|------------|-------------|-------------|-------------|
| <b>45.</b> |             |             |             |
| Cl         | -0.92106328 | -2.25722743 | -0.24855706 |
| Au         | 1.29693892  | -2.25727653 | -0.24856626 |
| N          | 3.25163292  | -2.25730423 | -0.24866526 |
| C          | 4.39550612  | -2.25729363 | -0.24887886 |
| C          | 5.88291932  | -2.25727053 | -0.24873736 |
| F          | 6.32749072  | -3.09239713 | -1.17252006 |
| F          | 6.32687672  | -2.63982773 | 0.93658144  |
| F          | 6.32728152  | -1.03957003 | -0.50994726 |
| Cl         | 1.29703027  | -5.39733739 | 2.11203597  |
| Au         | 1.29708060  | -3.30284455 | 2.84185341  |
| N          | 1.29713933  | -1.45696763 | 3.48494520  |
| C          | 1.29719818  | -0.37672208 | 3.86113063  |
| C          | 1.29713154  | 1.02782446  | 4.35066823  |
| F          | 2.38423785  | 1.64751940  | 3.92331277  |
| F          | 1.27969302  | 1.03727381  | 5.67280115  |
| F          | 0.22734392  | 1.65725068  | 3.89475160  |

|            |             |             |             |
|------------|-------------|-------------|-------------|
| <b>46.</b> |             |             |             |
| Cl         | -0.87842450 | -3.15533593 | 0.81576075  |
| Au         | 1.33505540  | -3.15533423 | 0.81576235  |
| N          | 3.28421250  | -3.15534093 | 0.81575615  |
| C          | 4.43042740  | -3.15535943 | 0.81573915  |
| N          | 5.84720580  | -3.15533333 | 0.81576315  |
| O          | 6.36035820  | -2.35691253 | 1.55585725  |
| O          | 6.36037900  | -3.95377413 | 0.07565055  |
| Cl         | 1.33505364  | 0.71593877  | 0.06967793  |
| Au         | 1.33505597  | -0.85097118 | -1.49374348 |
| N          | 1.33504685  | -2.23076879 | -2.87046857 |

|   |            |             |             |
|---|------------|-------------|-------------|
| C | 1.33502175 | -3.04216861 | -3.68006039 |
| N | 1.33505717 | -4.04509706 | -4.68075793 |
| O | 2.42299680 | -4.38008057 | -5.07154414 |
| O | 0.24709033 | -4.43664440 | -5.01488354 |

**47.**

|    |             |             |             |
|----|-------------|-------------|-------------|
| Cl | -0.91913753 | -2.62499572 | 0.05975897  |
| Au | 1.30719387  | -2.62499732 | 0.05975807  |
| N  | 3.27835537  | -2.62499972 | 0.05975547  |
| C  | 4.42319357  | -2.62500192 | 0.05975287  |
| C  | 5.86596127  | -2.62500792 | 0.05974717  |
| H  | 6.23551367  | -1.62111682 | -0.15567893 |
| H  | 6.23551117  | -2.94039182 | 1.03685487  |
| H  | 6.23550327  | -3.31351992 | -0.70193703 |
| Cl | 1.22941765  | 1.07652900  | 1.55440832  |
| Au | 1.23064221  | 0.56652566  | -0.61272033 |
| N  | 1.23172447  | 0.11497549  | -2.53146443 |
| C  | 1.23235181  | -0.14728258 | -3.64585880 |
| C  | 1.23313945  | -0.47779262 | -5.05025943 |
| H  | 1.20544432  | 0.43662102  | -5.64511688 |
| H  | 2.13615015  | -1.03835506 | -5.29747395 |
| H  | 0.35843082  | -1.08561320 | -5.28734981 |

**48.**

|    |             |             |             |
|----|-------------|-------------|-------------|
| Cl | -0.91731660 | -2.65388450 | 0.34095942  |
| Au | 1.31103740  | -2.65388600 | 0.34095792  |
| N  | 3.28824020  | -2.65388950 | 0.34095462  |
| C  | 4.43888740  | -2.65389130 | 0.34095292  |
| N  | 5.74730530  | -2.65389740 | 0.34094742  |
| H  | 6.25552510  | -3.28985720 | -0.24855398 |
| H  | 6.25553630  | -2.01793840 | 0.93044782  |
| Cl | 1.31103942  | 1.19323568  | -0.55855448 |
| Au | 1.31103730  | -0.44952238 | -2.06417977 |
| N  | 1.31103249  | -1.90713003 | -3.40011047 |
| C  | 1.31103002  | -2.75539515 | -4.17756482 |
| N  | 1.31102181  | -3.71997000 | -5.06161955 |
| H  | 0.44388117  | -4.09133090 | -5.40860995 |
| H  | 2.17816117  | -4.09794359 | -5.40141154 |

**49.**

|    |             |             |             |
|----|-------------|-------------|-------------|
| Cl | -0.95192426 | -2.96807171 | 0.77220375  |
| Au | 1.27416444  | -2.96843971 | 0.77190365  |
| N  | 3.25803694  | -2.96206731 | 0.77782925  |
| C  | 4.40399704  | -2.93718831 | 0.80084755  |
| O  | 5.67864044  | -2.97659231 | 0.76429885  |
| H  | 6.07650904  | -2.32835131 | 1.36478275  |
| Cl | 1.27560731  | 0.79875099  | -0.34202133 |
| Au | 1.27513266  | -0.93058540 | -1.74375831 |
| N  | 1.28381415  | -2.47213237 | -2.99251104 |
| C  | 1.31763447  | -3.36377971 | -3.71236836 |
| O  | 1.26401154  | -4.35171176 | -4.51779938 |
| H  | 2.14567868  | -4.69783754 | -4.72263283 |

**50.**

|    |             |             |             |
|----|-------------|-------------|-------------|
| N  | 2.76351490  | -1.85525006 | -0.00000244 |
| C  | 3.90546800  | -1.85525196 | -0.00000414 |
| H  | 4.97451060  | -1.85525596 | -0.00000784 |
| Br | -1.56382740 | -1.85524686 | 0.00000066  |
| Au | 0.78498290  | -1.85524746 | 0.00000006  |
| N  | 0.78498040  | 1.38224976  | -1.97853223 |
| C  | 0.78497870  | 1.38224775  | -3.12048533 |
| H  | 0.78497500  | 1.38224365  | -4.18952793 |
| Br | 0.78498350  | 1.38225336  | 2.34881007  |
| Au | 0.78498290  | 1.38225254  | -0.00000023 |

**51.**

|    |             |             |             |
|----|-------------|-------------|-------------|
| N  | 1.70973589  | -1.22660620 | -0.00000309 |
| C  | 2.85296069  | -1.22660810 | -0.00000489 |
| Br | -2.64125681 | -1.22660200 | 0.00000081  |
| F  | 4.09961919  | -1.22661150 | -0.00000799 |
| Au | -0.29234801 | -1.22660280 | 0.00000011  |
| N  | -0.29234577 | 1.97339665  | -2.00208467 |
| C  | -0.29234757 | 1.97339638  | -3.14530947 |
| Br | -0.29234187 | 1.97339465  | 2.34890803  |
| F  | -0.29235067 | 1.97339476  | -4.39196797 |
| Au | -0.29234257 | 1.97339720  | -0.00000077 |

**52.**

|    |             |             |             |
|----|-------------|-------------|-------------|
| N  | -0.11177999 | -0.21814160 | 0.00707053  |
| C  | 1.03205921  | -0.21812940 | 0.00685343  |
| Br | -4.42715189 | -0.21806380 | 0.00716603  |
| C  | 2.51994371  | -0.21810670 | 0.00699243  |
| F  | 2.96411121  | -1.05324490 | -0.91680677 |
| F  | 2.96349681  | -0.60066940 | 1.19232423  |

|    |             |             |             |
|----|-------------|-------------|-------------|
| F  | 2.96390181  | 0.99961130  | -0.25422507 |
| Au | -2.08203729 | -0.21811360 | 0.00716093  |
| N  | -2.08211749 | 2.52694096  | -2.59037910 |
| C  | -2.08232732 | 2.28925650  | -3.70925096 |
| Br | -2.08200791 | 3.42392071  | 1.63074183  |
| C  | -2.08218663 | 1.98000190  | -5.16464158 |
| F  | -3.15939590 | 1.27644578  | -5.46923070 |
| F  | -1.00225899 | 1.28078232  | -5.46952403 |
| F  | -2.08459324 | 3.10594829  | -5.85775732 |
| Au | -2.08202325 | 2.93645579  | -0.66315015 |

53.

|    |             |             |             |
|----|-------------|-------------|-------------|
| N  | 1.63746502  | -0.95129477 | -0.42906997 |
| C  | 2.78377052  | -0.95130057 | -0.42907157 |
| Br | -2.66707168 | -0.95128867 | -0.42906507 |
| N  | 4.20063062  | -0.95129277 | -0.42907657 |
| O  | 4.71375982  | -2.04013927 | -0.42908297 |
| O  | 4.71376752  | 0.13752003  | -0.42907397 |
| Au | -0.32674188 | -0.95129097 | -0.42906667 |
| N  | -0.32673263 | 1.02171060  | 2.81560180  |
| C  | -0.32672683 | 2.16801190  | 2.81249760  |
| Br | -0.32673871 | -3.28281032 | 2.82725734  |
| N  | -0.32673464 | 3.58486679  | 2.80865776  |
| O  | 0.76210784  | 4.09798611  | 2.80431180  |
| O  | -1.41554344 | 4.09800981  | 2.81022214  |
| Au | -0.32673642 | -0.94248910 | 2.82092141  |

54.

|    |             |             |             |
|----|-------------|-------------|-------------|
| N  | 1.67606255  | -1.04497790 | 0.04208236  |
| C  | 2.82091295  | -1.04497990 | 0.04207946  |
| Br | -2.66244115 | -1.04497380 | 0.04208556  |
| C  | 4.26369465  | -1.04498550 | 0.04207396  |
| H  | 4.63297575  | -0.04102250 | -0.17336774 |
| H  | 4.63297315  | -1.36039260 | 1.01925206  |
| H  | 4.63296505  | -1.73354770 | -0.71966534 |
| Au | -0.30954445 | -1.04497530 | 0.04208486  |
| N  | -0.30954416 | 1.70903849  | -2.57314928 |
| C  | -0.30954741 | 1.47104985  | -3.69299027 |
| Br | -0.30954018 | 2.61091405  | 1.67057960  |
| C  | -0.30955396 | 1.17112543  | -5.10425367 |
| H  | -0.31158711 | 2.09874670  | -5.67891878 |
| H  | 0.58071108  | 0.59388703  | -5.35910516 |
| H  | -1.19778999 | 0.59044546  | -5.35836548 |
| Au | -0.30954117 | 2.12180119  | -0.63091806 |

55.

|    |             |             |             |
|----|-------------|-------------|-------------|
| N  | 1.99106916  | -0.76473805 | -0.75488378 |
| C  | 3.14184596  | -0.76473965 | -0.75488588 |
| Br | -2.35463724 | -0.76473295 | -0.75487898 |
| N  | 4.45011666  | -0.76474705 | -0.75488818 |
| H  | 4.95826126  | 0.10247105  | -0.75488888 |
| H  | 4.95825246  | -1.63196235 | -0.75489608 |
| Au | -0.00000134 | -0.76473445 | -0.75488028 |
| N  | 0.00000797  | 1.24248577  | 2.47263192  |
| C  | 0.00000956  | 2.39324820  | 2.46688256  |
| Br | 0.00000289  | -3.10316641 | 2.49434023  |
| N  | 0.00001695  | 3.70150258  | 2.46034641  |
| H  | -0.86719033 | 4.20966248  | 2.46214202  |
| H  | 0.86722138  | 4.20961035  | 2.45346667  |
| Au | 0.00000439  | -0.74855988 | 2.48257932  |

56.

|    |             |             |             |
|----|-------------|-------------|-------------|
| N  | 1.59444907  | 0.11614457  | 0.39864530  |
| C  | 2.74064717  | 0.14105427  | 0.42168830  |
| Br | -2.75659293 | 0.11098217  | 0.39379130  |
| O  | 4.01503087  | 0.10242697  | 0.38585240  |
| H  | 4.41256307  | 0.75080347  | 0.98648570  |
| Au | -0.40425363 | 0.11005177  | 0.39297640  |
| N  | -0.39514916 | 0.61248337  | -3.35702594 |
| C  | -0.36127082 | -0.27275172 | -4.08512803 |
| Br | -0.40222043 | 3.96851600  | -0.58780012 |
| O  | -0.41387124 | -1.25366096 | -4.89868833 |
| H  | 0.46848654  | -1.59269710 | -5.11242540 |
| Au | -0.40345655 | 2.15429888  | -2.08516996 |

57.

|    |             |             |             |
|----|-------------|-------------|-------------|
| N  | 3.14698086  | -0.49914512 | -0.00000259 |
| C  | 4.28890216  | -0.49914702 | -0.00000439 |
| H  | 5.35813716  | -0.49915082 | -0.00000789 |
| I  | -1.36686724 | -0.49914182 | 0.00000051  |
| Au | 1.14334446  | -0.49914232 | 0.00000001  |
| N  | 1.14334638  | 2.71335755  | -2.00363660 |
| C  | 1.14334458  | 2.71335717  | -3.14555790 |
| H  | 1.14334108  | 2.71335480  | -4.21479290 |
| I  | 1.14334948  | 2.71335483  | 2.51021150  |

Au 1.14334898 2.71335768 -0.00000020

58.

N 1.39268054 -2.29269498 -0.00000330  
C 2.53622684 -2.29269698 -0.00000510  
I -3.14561136 -2.29269088 0.00000060  
F 3.78281384 -2.29270028 -0.00000820  
Au -0.63628556 -2.29269148 0.00000000  
N -0.63628340 0.88230803 -2.02896685  
C -0.63628520 0.88230773 -3.17251315  
I -0.63627950 0.88230540 2.50932505  
F -0.63628830 0.88230628 -4.41910015  
Au -0.63628010 0.88230852 -0.00000075

59.

N 1.79780228 -0.21665782 0.18511559  
C 2.94161418 -0.21689292 0.18502279  
I -2.70489052 -0.21655482 0.18521169  
C 4.42994388 -0.21673592 0.18510769  
F 4.87401508 -1.11418702 -0.67821381  
F 4.87350538 -0.51559392 1.39420239  
F 4.87326868 0.97989958 -0.16052471  
Au -0.19779072 -0.21655542 0.18517759  
N -0.19775005 2.28468314 -2.63726765  
C -0.19790582 1.95959656 -3.73390999  
I -0.19762866 3.56372563 1.67994125  
C -0.19777981 1.53696296 -5.16097206  
F -1.28050904 0.82099013 -5.41201400  
F 0.87657247 0.80684929 -5.40729319  
F -0.18917513 2.60525740 -5.93982258  
Au -0.19766152 2.85160153 -0.72389498

60.

N 1.96254182 -1.82751901 -0.02540899  
C 3.10906922 -1.82752511 -0.02541059  
I -2.52771198 -1.82750481 -0.02540389  
N 4.52534772 -1.82749601 -0.02541529  
O 5.03885792 -2.91665861 -0.02542169  
O 5.03883932 -0.73836391 -0.02541269  
Au -0.02579538 -1.82750801 -0.02540549  
N -0.02577854 0.20342027 3.17294411  
C -0.02577246 1.34984686 3.15774072  
I -0.02579267 -4.28643875 3.23248528  
N -0.02580162 2.76600081 3.13895810  
O 1.06326510 3.27927426 3.11769928  
O -1.11483789 3.27963883 3.14659579  
Au -0.02578949 -1.78474210 3.19931094

61.

N 0.03439366 0.69339398 0.05826098  
C 1.17930266 0.69338998 0.05825828  
I -4.48835974 0.69339558 0.05826348  
C 2.62220036 0.69338318 0.05825218  
H 2.99142006 1.67983558 -0.22670552  
H 2.99142076 0.44693658 1.05502328  
H 2.99141196 -0.04662412 -0.65356432  
Au -1.97492254 0.69339608 0.05826328  
N -1.97492318 3.12652944 -2.72152335  
C -1.97492687 2.81374245 -3.82287748  
I -1.97492034 4.36212618 1.62917763  
C -1.97493460 2.41954459 -5.21088390  
H -1.97955630 3.30639085 -5.84656838  
H -1.08341094 1.82866699 -5.42689663  
H -2.86183994 1.82096988 -5.42470151  
Au -1.97492039 3.67546694 -0.78864487

62.

N 1.75605721 -0.82034579 -0.08629612  
C 2.90702831 -0.82034789 -0.08629802  
I -2.77250119 -0.82034069 -0.08629112  
N 4.21531871 -0.82035159 -0.08630022  
H 4.72339581 0.04689701 -0.08630102  
H 4.72338871 -1.68760669 -0.08630812  
Au -0.25795369 -0.82034209 -0.08629242  
N -0.25794413 1.16342284 3.14497250  
C -0.25794201 2.31434322 3.15577742  
I -0.25794928 -3.36493599 3.10245751  
N -0.25793829 3.62257597 3.16805917  
H -1.12514869 4.13070711 3.16468952  
H 0.60927868 4.13054722 3.18096108  
Au -0.25794787 -0.85049932 3.12606603

63.

N 2.29840673 0.17734839 0.22967992  
C 3.44487763 0.20244709 0.25290202

|    |             |             |             |
|----|-------------|-------------|-------------|
| I  | -2.23719767 | 0.17374669  | 0.22626222  |
| O  | 4.71921523  | 0.16512729  | 0.21825852  |
| H  | 5.11578303  | 0.81371169  | 0.81930052  |
| Au | 0.27510723  | 0.17129879  | 0.22404762  |
| N  | 0.28383235  | 0.72953080  | -3.50988680 |
| C  | 0.31800777  | -0.13754326 | -4.25993969 |
| I  | 0.27887218  | 4.15704847  | -0.53939358 |
| O  | 0.26711698  | -1.09936152 | -5.09590921 |
| H  | 1.15087864  | -1.41844488 | -5.33324938 |
| Au | 0.27557199  | 2.25864929  | -2.18491978 |

64.

|    |             |             |             |
|----|-------------|-------------|-------------|
| Au | 1.17755111  | -2.76696743 | -0.00000027 |
| N  | 3.18005811  | -2.76697003 | -0.00000267 |
| C  | 4.32042041  | -2.76697173 | -0.00000427 |
| H  | 5.39021461  | -2.76697513 | -0.00000747 |
| C  | -0.76660729 | -2.76696673 | 0.00000043  |
| N  | -1.92188469 | -2.76696663 | 0.00000043  |
| Au | 1.17755537  | 0.48303257  | -0.00000054 |
| N  | 1.17755297  | 0.48303240  | -2.00250754 |
| C  | 1.17755137  | 0.48303209  | -3.14286984 |
| H  | 1.17754817  | 0.48302999  | -4.21266404 |
| C  | 1.17755607  | 0.48303090  | 1.94415786  |
| N  | 1.17755607  | 0.48302960  | 3.09943526  |

65.

|    |             |             |             |
|----|-------------|-------------|-------------|
| Au | 1.18369720  | -3.23992148 | 0.00000014  |
| N  | 3.20607050  | -3.23992488 | -0.00000296 |
| C  | 4.34830270  | -3.23992658 | -0.00000456 |
| C  | -0.75711930 | -3.23992058 | 0.00000094  |
| N  | -1.91236920 | -3.23992058 | 0.00000104  |
| F  | 5.59216490  | -3.23992928 | -0.00000706 |
| Au | 1.18370261  | -0.01492148 | -0.00000127 |
| N  | 1.18369951  | -0.01492232 | -2.02237457 |
| C  | 1.18369791  | -0.01492258 | -3.16460677 |
| C  | 1.18370341  | -0.01492304 | 1.94081523  |
| N  | 1.18370351  | -0.01492450 | 3.09606513  |
| F  | 1.18369541  | -0.01492370 | -4.40846897 |

66.

|    |             |             |             |
|----|-------------|-------------|-------------|
| Au | 1.23505366  | -2.47279273 | 0.02850938  |
| N  | 3.23173266  | -2.47282553 | 0.02839768  |
| C  | 4.37359746  | -2.47280563 | 0.02813848  |
| C  | -0.70931264 | -2.47274323 | 0.02850378  |
| N  | -1.86444424 | -2.47272013 | 0.02849228  |
| C  | 5.86604486  | -2.47276593 | 0.02833588  |
| F  | 6.30455636  | -1.25493573 | -0.23287372 |
| F  | 6.30406576  | -2.85535443 | 1.21380348  |
| F  | 6.30483446  | -3.30797223 | -0.89551762 |
| Au | 1.23506731  | 0.69147421  | -0.65619566 |
| N  | 1.23495120  | 0.26919278  | -2.60770928 |
| C  | 1.23470207  | 0.02777493  | -3.72376154 |
| C  | 1.23507230  | 1.10273236  | 1.24417984  |
| N  | 1.23506595  | 1.34705301  | 2.37317782  |
| C  | 1.23490340  | -0.28786233 | -5.18245012 |
| F  | 1.23716891  | 0.83675113  | -5.87445635 |
| F  | 2.31263842  | -0.99102469 | -5.47845625 |
| F  | 0.15530571  | -0.98753775 | -5.47999725 |

67.

|    |             |             |             |
|----|-------------|-------------|-------------|
| Au | 1.26416596  | -2.75580057 | 0.43440303  |
| N  | 3.25668146  | -2.75580797 | 0.43439613  |
| C  | 4.40045306  | -2.75579637 | 0.43440703  |
| C  | -0.67953924 | -2.75580127 | 0.43440243  |
| N  | -1.83474754 | -2.75580157 | 0.43440213  |
| N  | 5.82526676  | -2.75585257 | 0.43435483  |
| O  | 6.33268066  | -1.95732597 | 1.17454693  |
| O  | 6.33271306  | -3.55426827 | -0.30573457 |
| Au | 1.26416615  | -0.52107868 | -1.90812218 |
| N  | 1.26415604  | -1.96278302 | -3.28347909 |
| C  | 1.26417195  | -2.79037017 | -4.07298082 |
| C  | 1.26416523  | 0.88530837  | -0.56645704 |
| N  | 1.26416481  | 1.72117075  | 0.23093892  |
| N  | 1.26409526  | -3.82130889 | -5.05647430 |
| O  | 2.35280327  | -4.17767214 | -5.41802381 |
| O  | 0.17553838  | -4.19925621 | -5.39544546 |

68.

|    |             |             |             |
|----|-------------|-------------|-------------|
| Au | 1.24175423  | -2.65560036 | 0.06056692  |
| N  | 3.24870383  | -2.65560366 | 0.06056372  |
| C  | 4.39264493  | -2.65560526 | 0.06056142  |
| C  | -0.70199007 | -2.65559896 | 0.06056762  |
| N  | -1.85756377 | -2.65559876 | 0.06056762  |
| C  | 5.83482103  | -2.65561046 | 0.06055622  |
| H  | 6.20259043  | -1.65117286 | -0.15498698 |



|    |            |             |             |
|----|------------|-------------|-------------|
| H  | 6.20258823 | -2.97116606 | 1.03819622  |
| H  | 6.20258033 | -3.34449736 | -0.70154268 |
| Au | 1.24175853 | 0.52337856  | -0.55221305 |
| N  | 1.24175476 | 0.14351186  | -2.52288501 |
| C  | 1.24175220 | -0.07300798 | -3.64614829 |
| C  | 1.24175948 | 0.89128075  | 1.35639636  |
| N  | 1.24175952 | 1.11000143  | 2.49108215  |
| C  | 1.24174611 | -0.34597900 | -5.06225518 |
| H  | 1.22021601 | 0.59292495  | -5.61777650 |
| H  | 2.14198664 | -0.90153852 | -5.32970354 |
| H  | 0.36303270 | -0.93815338 | -5.32263766 |

69.

|    |             |             |             |
|----|-------------|-------------|-------------|
| Au | 1.24890151  | -3.01052888 | 0.72087166  |
| N  | 3.25911011  | -3.01053248 | 0.72086826  |
| C  | 4.40935701  | -3.01053398 | 0.72086686  |
| C  | -0.69368479 | -3.01052728 | 0.72087316  |
| N  | -1.84945789 | -3.01052718 | 0.72087326  |
| N  | 5.71584231  | -3.01053958 | 0.72086186  |
| H  | 6.22379791  | -3.64688118 | 0.13100656  |
| H  | 6.22380851  | -2.37419838 | 1.31071646  |
| Au | 1.24890145  | -0.79949435 | -1.66110783 |
| N  | 1.24889650  | -2.27280994 | -3.02868957 |
| C  | 1.24889445  | -3.11584519 | -3.81122359 |
| C  | 1.24890364  | 0.62425974  | -0.33953081 |
| N  | 1.24890379  | 1.47134524  | 0.44676278  |
| N  | 1.24888694  | -4.07339029 | -4.70004934 |
| H  | 0.38121215  | -4.44608768 | -5.04518106 |
| H  | 2.11656097  | -4.44527887 | -5.04606799 |

70.

|    |             |             |             |
|----|-------------|-------------|-------------|
| Au | 1.21339808  | -1.73559285 | -0.59608879 |
| N  | 3.23108851  | -1.72998660 | -0.58442434 |
| C  | 4.37680573  | -1.70996886 | -0.56224681 |
| C  | -0.72810682 | -1.73811995 | -0.59845839 |
| N  | -1.88351612 | -1.73446185 | -0.59508609 |
| O  | 5.64819216  | -1.75386094 | -0.59889288 |
| H  | 6.05421413  | -1.10865171 | 0.00010457  |
| Au | 1.20667743  | -4.04262110 | 1.67525041  |
| N  | 1.19444208  | -2.62366831 | 3.10970691  |
| C  | 1.16460245  | -1.81713284 | 3.92344559  |
| C  | 1.21013029  | -5.40770197 | 0.29467243  |
| N  | 1.20515630  | -6.21983526 | -0.52716100 |
| O  | 1.22150982  | -0.92519656 | 4.82948318  |
| H  | 0.34209259  | -0.60970651 | 5.08840032  |

71.

|    |             |             |             |
|----|-------------|-------------|-------------|
| Cl | -1.00691151 | -2.34964325 | -0.31596895 |
| N  | 3.27108939  | -2.34951385 | -0.31591485 |
| C  | 3.95423629  | -3.50016265 | -0.27557435 |
| C  | 3.95417859  | -1.19884995 | -0.35625175 |
| C  | 5.33430489  | -3.53935465 | -0.27428485 |
| H  | 3.36329689  | -4.40555325 | -0.24377775 |
| C  | 5.33424189  | -1.15957805 | -0.35770285 |
| H  | 3.36319409  | -0.29347395 | -0.38796125 |
| C  | 6.04106609  | -2.34945735 | -0.31609725 |
| H  | 5.83837499  | -4.49637555 | -0.24070555 |
| H  | 5.83826549  | -0.20253755 | -0.39123745 |
| H  | 7.12427459  | -2.34942575 | -0.31626835 |
| Au | 1.22556679  | -2.34957495 | -0.31594535 |
| Cl | 1.22558560  | -4.50012704 | 2.85372362  |
| N  | 1.22545766  | -0.22358126 | 2.74215369  |
| C  | 2.37676697  | 0.45960281  | 2.73466318  |
| C  | 0.07413334  | 0.45900570  | 2.71399852  |
| C  | 2.41597926  | 1.83920849  | 2.69892012  |
| H  | 3.28267871  | -0.13092169 | 2.75826950  |
| C  | 0.03483696  | 1.83858795  | 2.67756109  |
| H  | -0.83176154 | -0.13198901 | 2.72131921  |
| C  | 1.22539642  | 2.54544758  | 2.66969492  |
| H  | 3.37355023  | 2.34333205  | 2.69439034  |
| H  | -0.92275243 | 2.34221604  | 2.65583152  |
| H  | 1.22536037  | 3.62828282  | 2.64126023  |
| Au | 1.22551794  | -2.26840821 | 2.79549615  |

72.

|    |             |             |             |
|----|-------------|-------------|-------------|
| Cl | -1.00797692 | -2.37692544 | -0.64379895 |
| N  | 3.27179538  | -2.37679864 | -0.64373415 |
| C  | 3.95644498  | -3.52674984 | -0.60342225 |
| C  | 3.95638968  | -1.22682894 | -0.68405075 |
| C  | 5.33451038  | -3.57594334 | -0.60180685 |
| H  | 3.36799098  | -4.43378504 | -0.57155375 |
| C  | 5.33446308  | -1.17756974 | -0.68587355 |
| H  | 3.36790978  | -0.31981084 | -0.71580335 |
| C  | 6.01778598  | -2.37675804 | -0.64397965 |
| H  | 5.86144588  | -4.51976654 | -0.56868905 |

|    |             |             |             |
|----|-------------|-------------|-------------|
| H  | 5.86135488  | -0.23373624 | -0.71894875 |
| Au | 1.22339108  | -2.37685454 | -0.64376655 |
| F  | 7.34048928  | -2.37672714 | -0.64425125 |
| Cl | 1.22340601  | -4.43265056 | 2.59943333  |
| N  | 1.22328297  | -0.15937964 | 2.36362273  |
| C  | 2.37370884  | 0.52295667  | 2.30283314  |
| C  | 0.07283837  | 0.52544647  | 2.34894196  |
| C  | 2.42291663  | 1.89886694  | 2.22578523  |
| H  | 3.28112240  | -0.06560269 | 2.31715337  |
| C  | 0.02355355  | 1.90147440  | 2.27388049  |
| H  | -0.83455174 | -0.06113279 | 2.39960375  |
| C  | 1.22322891  | 2.58242361  | 2.21203331  |
| H  | 3.36713117  | 2.42395874  | 2.17785238  |
| H  | -0.92066892 | 2.42861044  | 2.26377406  |
| Au | 1.22333700  | -2.20467228 | 2.47648637  |
| F  | 1.22318310  | 3.90310152  | 2.13886266  |

73.

|    |             |             |             |
|----|-------------|-------------|-------------|
| Cl | -0.99502541 | -2.34263603 | -0.01959045 |
| N  | 3.27857069  | -2.34177963 | -0.03477645 |
| C  | 3.96138579  | -3.49210323 | 0.01215235  |
| C  | 3.96060669  | -1.19065763 | -0.06784005 |
| C  | 5.34051009  | -3.53243243 | 0.03008785  |
| H  | 3.37210029  | -4.39849023 | 0.03850965  |
| C  | 5.33991119  | -1.14807153 | -0.05284915 |
| H  | 3.37062129  | -0.28503683 | -0.10444935 |
| C  | 6.04183939  | -2.33963473 | -0.00118145 |
| H  | 5.85153219  | -4.48469463 | 0.07595475  |
| H  | 5.85009919  | -0.19452103 | -0.07341365 |
| Au | 1.23424409  | -2.34239423 | -0.03159875 |
| C  | 7.54836439  | -2.34199893 | -0.02124595 |
| F  | 8.04334399  | -3.38892803 | 0.64060175  |
| F  | 8.00193919  | -2.40789963 | -1.27771015 |
| F  | 8.04669269  | -1.23432613 | 0.52919005  |
| Cl | 1.22904952  | -0.14921806 | -3.16116522 |
| N  | 1.23006854  | -4.42264479 | -3.12020330 |
| C  | 0.07933359  | -5.10493895 | -3.07585337 |
| C  | 2.38146600  | -5.10490174 | -3.13275346 |
| C  | 0.03882976  | -6.48371409 | -3.04020902 |
| H  | -0.82727368 | -4.51547974 | -3.06633469 |
| C  | 2.42390284  | -6.48388461 | -3.09921900 |
| H  | 3.28740714  | -4.51532657 | -3.16802113 |
| C  | 1.23188287  | -7.18523352 | -3.05029353 |
| H  | -0.91384351 | -6.99421744 | -2.99719023 |
| H  | 3.37761292  | -6.99417073 | -3.10351147 |
| Au | 1.22941716  | -2.37845292 | -3.14388613 |
| C  | 1.22972375  | -8.69189240 | -3.05058955 |
| F  | 0.17620728  | -9.17827634 | -2.39283469 |
| F  | 1.17643535  | -9.16194076 | -4.30158522 |
| F  | 2.33181867  | -9.18279898 | -2.48256893 |

74.

|    |             |             |             |
|----|-------------|-------------|-------------|
| Cl | -0.95802098 | -2.38935541 | -1.17786860 |
| N  | 3.31062642  | -2.38924301 | -1.17775340 |
| C  | 3.99047102  | -3.54271421 | -1.13728430 |
| C  | 3.99044462  | -1.23568041 | -1.21826900 |
| C  | 5.36991222  | -3.58923031 | -1.13589330 |
| H  | 3.39883432  | -4.44733661 | -1.10542060 |
| C  | 5.37001952  | -1.18928051 | -1.22007110 |
| H  | 3.39892312  | -0.33111951 | -1.24996400 |
| C  | 6.04749152  | -2.38927691 | -1.17820600 |
| H  | 5.90333782  | -4.52848161 | -1.10298510 |
| H  | 5.90338632  | -0.25003671 | -1.25306840 |
| Au | 1.26887602  | -2.38925361 | -1.17780400 |
| N  | 7.52102282  | -2.38948831 | -1.17889070 |
| O  | 8.06749932  | -3.46639391 | -1.14252250 |
| O  | 8.06775602  | -1.31242601 | -1.21587540 |
| Cl | 1.26889709  | -4.48717713 | 2.03519000  |
| N  | 1.26878946  | -0.22206298 | 1.86154698  |
| C  | 2.42295229  | 0.45695512  | 1.82741728  |
| C  | 0.11453343  | 0.45745300  | 1.84028657  |
| C  | 2.46948648  | 1.83523255  | 1.77076384  |
| H  | 3.32812219  | -0.13439235 | 1.84656326  |
| C  | 0.06809863  | 1.83588792  | 1.78421440  |
| H  | -0.79056817 | -0.13337029 | 1.86946899  |
| C  | 1.26880494  | 2.51251517  | 1.74968498  |
| H  | 3.40929912  | 2.36800002  | 1.74374827  |
| H  | -0.87171014 | 2.36902499  | 1.76771511  |
| Au | 1.26879800  | -2.26212313 | 1.94460898  |
| N  | 1.26898833  | 3.98479692  | 1.68901021  |
| O  | 2.34648212  | 4.53051739  | 1.65932571  |
| O  | 0.19131289  | 4.53135522  | 1.67358462  |

75.

|    |             |             |            |
|----|-------------|-------------|------------|
| Cl | -1.00904268 | -2.33659765 | 0.15536216 |
|----|-------------|-------------|------------|

|    |             |             |             |
|----|-------------|-------------|-------------|
| N  | 3.26986522  | -2.33677135 | 0.14364586  |
| C  | 3.95906092  | -3.48343435 | 0.18925736  |
| C  | 3.95881232  | -1.18967355 | 0.10884376  |
| C  | 5.33700552  | -3.51884705 | 0.20292996  |
| H  | 3.37274662  | -4.39211225 | 0.21874136  |
| C  | 5.33685292  | -1.15316485 | 0.11999986  |
| H  | 3.37236022  | -0.28123295 | 0.07462476  |
| C  | 6.06671602  | -2.33568905 | 0.16729806  |
| H  | 5.83797252  | -4.47837695 | 0.24532426  |
| H  | 5.83768932  | -0.19296195 | 0.09507706  |
| Au | 1.22467972  | -2.33680735 | 0.14689366  |
| C  | 7.55893682  | -2.33632225 | 0.15689236  |
| H  | 7.95957652  | -3.19728505 | 0.69315276  |
| H  | 7.92780522  | -2.38853645 | -0.87194534 |
| H  | 7.96014422  | -1.42639295 | 0.60424146  |
| Cl | 1.21969237  | -0.20187521 | -3.02936435 |
| N  | 1.21987928  | -4.47883611 | -2.89976687 |
| C  | 0.07236745  | -5.16728360 | -2.86565230 |
| C  | 2.36750650  | -5.16742247 | -2.87755777 |
| C  | 0.03656584  | -6.54406029 | -2.80754436 |
| H  | -0.83678712 | -4.58121396 | -2.88267137 |
| C  | 2.40366936  | -6.54430708 | -2.81981482 |
| H  | 3.27656226  | -4.58152193 | -2.90400572 |
| C  | 1.22026206  | -7.27337956 | -2.78374217 |
| H  | -0.92380073 | -7.04430299 | -2.77727659 |
| H  | 3.36418958  | -7.04474396 | -2.79952460 |
| Au | 1.21974119  | -2.43465898 | -2.96406390 |
| C  | 1.21994353  | -8.76513055 | -2.74487711 |
| H  | 0.34335681  | -9.14870105 | -2.22160498 |
| H  | 1.19846678  | -9.16781064 | -3.76207164 |
| H  | 2.11611388  | -9.15045306 | -2.25757308 |

#### 76.

|    |             |             |             |
|----|-------------|-------------|-------------|
| Cl | -0.98775387 | -2.37549337 | -1.13571454 |
| N  | 3.29457923  | -2.37537017 | -1.13564354 |
| C  | 3.99238993  | -3.51968167 | -1.09556954 |
| C  | 3.99241493  | -1.23103937 | -1.17574924 |
| C  | 5.36344163  | -3.56678247 | -1.09409614 |
| H  | 3.41021813  | -4.43110637 | -1.06350114 |
| C  | 5.36346483  | -1.18398827 | -1.17754084 |
| H  | 3.41023433  | -0.31962747 | -1.20761274 |
| C  | 6.09912243  | -2.37537577 | -1.13603654 |
| H  | 5.86214013  | -4.52753197 | -1.06035994 |
| H  | 5.86215373  | -0.22319157 | -1.21119694 |
| Au | 1.24868513  | -2.37540417 | -1.13567374 |
| N  | 7.44897023  | -2.37552317 | -1.13629794 |
| H  | 7.96505843  | -3.23418207 | -1.10738824 |
| H  | 7.96527943  | -1.51700017 | -1.16693974 |
| Cl | 1.24872540  | -4.51706096 | 2.05502089  |
| N  | 1.24860439  | -0.23665611 | 1.92652552  |
| C  | 2.39360301  | 0.46101220  | 1.91130712  |
| C  | 0.10358552  | 0.46069190  | 1.89981085  |
| C  | 2.44072681  | 1.83144763  | 1.87020357  |
| H  | 3.30557949  | -0.12075552 | 1.93350148  |
| C  | 0.05650185  | 1.83111233  | 1.85826791  |
| H  | -0.80837202 | -0.12136176 | 1.91277858  |
| C  | 1.24859820  | 2.56661100  | 1.84193092  |
| H  | 3.40205593  | 2.33006859  | 1.86013415  |
| H  | -0.90487204 | 2.32943159  | 1.83847385  |
| Au | 1.24863746  | -2.28162885 | 1.98791893  |
| N  | 1.24873769  | 3.91584231  | 1.80113838  |
| H  | 2.10787738  | 4.43179222  | 1.78878532  |
| H  | 0.38968189  | 4.43177229  | 1.78076079  |

#### 77.

|    |             |             |             |
|----|-------------|-------------|-------------|
| Cl | -1.00560140 | -2.37590470 | -1.26075499 |
| N  | 3.27504830  | -2.37941090 | -1.26051599 |
| C  | 3.95882190  | -3.52839250 | -1.22026339 |
| C  | 3.97337370  | -1.23501510 | -1.30062529 |
| C  | 5.33455590  | -3.58097490 | -1.21859159 |
| H  | 3.36986960  | -4.43522050 | -1.18838009 |
| C  | 5.34717680  | -1.19417270 | -1.30220009 |
| H  | 3.39119860  | -0.32384140 | -1.33250649 |
| C  | 6.05403320  | -2.39141940 | -1.26050699 |
| H  | 5.83363320  | -4.54245700 | -1.18483649 |
| H  | 5.87231390  | -0.24924760 | -1.33532999 |
| Au | 1.22797820  | -2.37456080 | -1.26074119 |
| O  | 7.39010400  | -2.33758070 | -1.26288269 |
| H  | 7.76149240  | -3.22522290 | -1.23246509 |
| Cl | 1.22918397  | -4.52072901 | 1.91270976  |
| N  | 1.23269547  | -0.24173579 | 1.79363455  |
| C  | 2.38235170  | 0.44200482  | 1.78292717  |
| C  | 0.08762725  | 0.45608694  | 1.76586619  |
| C  | 2.43496025  | 1.81721108  | 1.74482405  |
| H  | 3.28971532  | -0.14653255 | 1.80602263  |

|    |             |             |            |
|----|-------------|-------------|------------|
| C  | 0.04675687  | 1.82934489  | 1.72716542 |
| H  | -0.82408034 | -0.12604539 | 1.77550950 |
| C  | 1.24469959  | 2.53616213  | 1.71591515 |
| H  | 3.39700886  | 2.31629111  | 1.73797136 |
| H  | -0.89872377 | 2.35408657  | 1.70565883 |
| Au | 1.22784098  | -2.28801437 | 1.85055532 |
| O  | 1.19081569  | 3.87169017  | 1.67782561 |
| H  | 2.07896022  | 4.24309502  | 1.67324330 |

78.

|    |             |             |             |
|----|-------------|-------------|-------------|
| N  | 3.26019736  | -2.36305329 | -0.59598258 |
| C  | 3.94176376  | -3.51364829 | -0.55566398 |
| C  | 3.94169756  | -1.21248489 | -0.63633558 |
| C  | 5.32191966  | -3.55362629 | -0.55435518 |
| H  | 3.34995206  | -4.41905009 | -0.52385488 |
| C  | 5.32185376  | -1.17238869 | -0.63782418 |
| H  | 3.34984336  | -0.30708099 | -0.66803128 |
| C  | 6.02762586  | -2.36302339 | -0.59616438 |
| H  | 5.82661406  | -4.51007859 | -0.52082298 |
| H  | 5.82650566  | -0.21594649 | -0.67136888 |
| H  | 7.11105706  | -2.36297569 | -0.59628008 |
| Au | 1.18606856  | -2.36312619 | -0.59601188 |
| C  | -0.75773934 | -2.36317439 | -0.59604458 |
| N  | -1.91365824 | -2.36319709 | -0.59604698 |
| N  | 1.18594887  | -0.17665207 | 2.43862114  |
| C  | 2.33724876  | 0.50439543  | 2.41197424  |
| C  | 0.03467430  | 0.50445470  | 2.41540544  |
| C  | 2.37724789  | 1.88362331  | 2.36137010  |
| H  | 3.24320825  | -0.08706757 | 2.43232747  |
| C  | -0.00544951 | 1.88368760  | 2.36493034  |
| H  | -0.87128314 | -0.08695293 | 2.43843477  |
| C  | 1.18591235  | 2.58892016  | 2.33727655  |
| H  | 3.33428675  | 2.38792833  | 2.34149769  |
| H  | -0.96247874 | 2.38805380  | 2.34789296  |
| H  | 1.18586046  | 3.67162307  | 2.29755761  |
| Au | 1.18602065  | -2.24939576 | 2.51440958  |
| C  | 1.18606762  | -4.19190574 | 2.58543161  |
| N  | 1.18609022  | -5.34705218 | 2.62768333  |

79.

|    |             |             |             |
|----|-------------|-------------|-------------|
| N  | 3.26063797  | -2.31481753 | 0.66615382  |
| C  | 3.94399267  | -3.46465443 | 0.70644062  |
| C  | 3.94390397  | -1.16487143 | 0.62581742  |
| C  | 5.32182327  | -3.51472153 | 0.70807272  |
| H  | 3.35539167  | -4.37209503 | 0.73833922  |
| C  | 5.32181067  | -1.11477753 | 0.62395102  |
| H  | 3.35531627  | -0.25750743 | 0.59406992  |
| C  | 6.00451427  | -2.31475373 | 0.66590092  |
| H  | 5.84961897  | -4.45797383 | 0.74114962  |
| H  | 5.84952647  | -0.17153663 | 0.59087342  |
| Au | 1.18442387  | -2.31484773 | 0.66611722  |
| C  | -0.75846333 | -2.31489903 | 0.66607852  |
| N  | -1.91430903 | -2.31492413 | 0.66607822  |
| F  | 7.32595107  | -2.31471533 | 0.66569512  |
| N  | 1.18450946  | -4.51355740 | -2.37394296 |
| C  | 0.03397988  | -5.19658927 | -2.35224707 |
| C  | 2.33515013  | -5.19607038 | -2.34142267 |
| C  | -0.01611253 | -6.57334764 | -2.29789925 |
| H  | -0.87401154 | -4.60861875 | -2.37980336 |
| C  | 2.38527863  | -6.57288554 | -2.28658743 |
| H  | 3.24305900  | -4.60777460 | -2.36045858 |
| C  | 1.18458326  | -7.25527996 | -2.26524794 |
| H  | -0.95993418 | -7.10090325 | -2.28137489 |
| H  | 3.32908892  | -7.10000916 | -2.26120410 |
| Au | 1.18448074  | -2.43898199 | -2.45641632 |
| C  | 1.18443102  | -0.49762846 | -2.53359890 |
| N  | 1.18440595  | 0.65730575  | -2.57949279 |
| F  | 1.18462981  | -8.57568285 | -2.21298454 |

80.

|    |             |             |             |
|----|-------------|-------------|-------------|
| N  | 3.27044065  | -2.33581200 | 0.12950776  |
| C  | 3.95116355  | -3.48604140 | 0.17659216  |
| C  | 3.95044795  | -1.18489900 | 0.09672666  |
| C  | 5.33049145  | -3.52739360 | 0.19473246  |
| H  | 3.36161385  | -4.39290760 | 0.20273046  |
| C  | 5.33003735  | -1.14142490 | 0.11185666  |
| H  | 3.36035375  | -0.27873040 | 0.05995116  |
| C  | 6.03056285  | -2.33382010 | 0.16328716  |
| H  | 5.84239555  | -4.47914870 | 0.24066876  |
| H  | 5.84119925  | -0.18842180 | 0.09149586  |
| Au | 1.19548345  | -2.33644350 | 0.13154046  |
| C  | -0.74735675 | -2.33669310 | 0.13960286  |
| N  | -1.90308255 | -2.33666120 | 0.14545536  |
| C  | 7.53827565  | -2.33629130 | 0.14269376  |
| F  | 7.98823155  | -2.40255860 | -1.11442594 |

|    |             |             |             |
|----|-------------|-------------|-------------|
| F  | 8.03565525  | -1.22856490 | 0.69249736  |
| F  | 8.03216635  | -3.38304810 | 0.80444946  |
| N  | 1.19317155  | -4.53145027 | -2.91033672 |
| C  | 0.04198451  | -5.21149710 | -2.87979216 |
| C  | 2.34450013  | -5.21047976 | -2.87230112 |
| C  | -0.00002508 | -6.58906708 | -2.80823314 |
| H  | -0.86522090 | -4.62274834 | -2.91159783 |
| C  | 2.38736998  | -6.58830252 | -2.80052062 |
| H  | 3.25141105  | -4.62094830 | -2.89819297 |
| C  | 1.19388259  | -7.28802685 | -2.76644574 |
| H  | -0.95283740 | -7.10017458 | -2.77804171 |
| H  | 3.34045971  | -7.09842571 | -2.76432309 |
| Au | 1.19246142  | -2.45806409 | -2.99109053 |
| C  | 1.19190420  | -0.51644889 | -3.06053983 |
| N  | 1.19171288  | 0.63859058  | -3.10079101 |
| C  | 1.19219615  | -8.79536445 | -2.72696665 |
| F  | 1.17368758  | -9.29516662 | -3.96674761 |
| F  | 2.27825865  | -9.26875740 | -2.11615113 |
| F  | 0.12107880  | -9.26407260 | -2.08621028 |

81.

|    |             |             |             |
|----|-------------|-------------|-------------|
| N  | 3.28676164  | -2.33377510 | 0.25108548  |
| C  | 3.96401294  | -3.48701910 | 0.29154528  |
| C  | 3.96404824  | -1.18064980 | 0.21057418  |
| C  | 5.34411224  | -3.53440150 | 0.29296208  |
| H  | 3.37227944  | -4.39214940 | 0.32343798  |
| C  | 5.34415804  | -1.13322210 | 0.20873348  |
| H  | 3.37234274  | -0.27545200 | 0.17885778  |
| C  | 6.01954484  | -2.33390990 | 0.25063178  |
| H  | 5.87950594  | -4.47228570 | 0.32581628  |
| H  | 5.87956184  | -0.19541070 | 0.17577958  |
| Au | 1.21215014  | -2.33383650 | 0.25102568  |
| C  | -0.73051126 | -2.33391270 | 0.25096858  |
| N  | -1.88613996 | -2.33395090 | 0.25097298  |
| N  | 7.49554634  | -2.33400510 | 0.24997228  |
| O  | 8.04046244  | -3.41109440 | 0.28632608  |
| O  | 8.04064284  | -1.25690810 | 0.21303988  |
| N  | 1.21230214  | -4.49997065 | -2.79848775 |
| C  | 0.05836506  | -5.17674111 | -2.77223931 |
| C  | 2.36612212  | -5.17714341 | -2.78460311 |
| C  | 0.01096148  | -6.55623263 | -2.73128532 |
| H  | -0.84731331 | -4.58512064 | -2.78482737 |
| C  | 2.41358358  | -6.55665840 | -2.74408611 |
| H  | 3.27186271  | -4.58584057 | -2.80694859 |
| C  | 1.21218089  | -7.23156437 | -2.71786557 |
| H  | -0.92748489 | -7.09124354 | -2.71044506 |
| H  | 3.35196014  | -7.09197662 | -2.73325844 |
| Au | 1.21224255  | -2.42627427 | -2.86010137 |
| C  | 1.21216808  | -0.48446985 | -2.91779789 |
| N  | 1.21212976  | 0.67065021  | -2.95208120 |
| N  | 1.21210534  | -8.70693574 | -2.67473554 |
| O  | 0.13441136  | -9.25148386 | -2.65425280 |
| O  | 2.28982422  | -9.25193752 | -2.66345636 |

82.

|    |             |             |             |
|----|-------------|-------------|-------------|
| N  | 3.26112581  | -2.33610555 | 0.33178792  |
| C  | 3.94890931  | -3.48305195 | 0.37448662  |
| C  | 3.94869201  | -1.18907765 | 0.29406802  |
| C  | 5.32687991  | -3.51957895 | 0.38403652  |
| H  | 3.36243841  | -4.39212955 | 0.40627052  |
| C  | 5.32669731  | -1.15172785 | 0.30102992  |
| H  | 3.36208471  | -0.27998025 | 0.26210282  |
| C  | 6.05543241  | -2.33531645 | 0.34844802  |
| H  | 5.83026671  | -4.47798625 | 0.42435322  |
| H  | 5.83002101  | -0.19277915 | 0.27412212  |
| Au | 1.18868921  | -2.33612655 | 0.33566302  |
| C  | -0.75488899 | -2.33604535 | 0.33865512  |
| N  | -1.91081949 | -2.33601065 | 0.33920272  |
| C  | 7.54755471  | -2.33570055 | 0.34342032  |
| H  | 7.94571751  | -3.19671135 | 0.88138962  |
| H  | 7.92135391  | -2.38784205 | -0.68360858 |
| H  | 7.94634431  | -1.42554455 | 0.79248582  |
| N  | 1.18295295  | -4.45759475 | -2.74362333 |
| C  | 0.03552448  | -5.14480217 | -2.70477450 |
| C  | 2.33039819  | -5.14543330 | -2.75314342 |
| C  | -0.00112752 | -6.52239688 | -2.67134061 |
| H  | -0.87391041 | -4.55808848 | -2.69607631 |
| C  | 2.36765193  | -6.52309000 | -2.72126465 |
| H  | 3.23985131  | -4.55925585 | -2.78279152 |
| C  | 1.18351906  | -7.25116824 | -2.67748425 |
| H  | -0.96000265 | -7.02523139 | -2.63550509 |
| H  | 3.32688466  | -7.02657069 | -2.72586367 |
| Au | 1.18287059  | -2.38541439 | -2.77644127 |
| C  | 1.18290320  | -0.44208783 | -2.80785915 |
| N  | 1.18292621  | 0.71367119  | -2.82777655 |

|   |            |             |             |
|---|------------|-------------|-------------|
| C | 1.18321043 | -8.74314577 | -2.65609854 |
| H | 0.31477158 | -9.13193847 | -2.12323985 |
| H | 1.14541908 | -9.13508081 | -3.67697643 |
| H | 2.08700729 | -9.13369488 | -2.18737736 |

**83.**

|    |             |             |             |
|----|-------------|-------------|-------------|
| N  | 3.26942515  | -2.32354503 | 0.52354042  |
| C  | 3.96679355  | -3.46799813 | 0.56361032  |
| C  | 3.96684235  | -1.17925953 | 0.48343012  |
| C  | 5.33718835  | -3.51610393 | 0.56511592  |
| H  | 3.38479065  | -4.38007623 | 0.59570332  |
| C  | 5.33717875  | -1.13106213 | 0.48159552  |
| H  | 3.38480495  | -0.26708413 | 0.45154872  |
| C  | 6.07245375  | -2.32364413 | 0.52315752  |
| H  | 5.83639065  | -4.47671533 | 0.59882752  |
| H  | 5.83641475  | -0.17049153 | 0.44794322  |
| Au | 1.19830525  | -2.32362853 | 0.52350502  |
| C  | -0.74583835 | -2.32369323 | 0.52346802  |
| N  | -1.90210145 | -2.32372733 | 0.52346672  |
| N  | 7.42084015  | -2.32375403 | 0.52294032  |
| H  | 7.93738185  | -3.18228553 | 0.55186272  |
| H  | 7.93757325  | -1.46526893 | 0.49223902  |
| N  | 1.19844513  | -4.49904449 | -2.52980923 |
| C  | 0.05329163  | -5.19596883 | -2.50488710 |
| C  | 2.34343249  | -5.19611347 | -2.50772575 |
| C  | 0.00516242  | -6.56558771 | -2.45877804 |
| H  | -0.85935003 | -4.61425423 | -2.52324799 |
| C  | 2.39166435  | -6.56567688 | -2.46170468 |
| H  | 3.25616425  | -4.61444304 | -2.52841788 |
| C  | 1.19835902  | -7.30049077 | -2.43563784 |
| H  | -0.95603952 | -7.06446366 | -2.44068694 |
| H  | 3.35282351  | -7.06466902 | -2.44605667 |
| Au | 1.19836287  | -2.42910466 | -2.59971444 |
| C  | 1.19829946  | -0.48606890 | -2.66533720 |
| N  | 1.19826542  | 0.66953603  | -2.70434496 |
| N  | 1.19825651  | -8.64811718 | -2.39037212 |
| H  | 0.33923798  | -9.16436784 | -2.37303448 |
| H  | 2.05728874  | -9.16461326 | -2.37463177 |

**84.**

|    |             |             |             |
|----|-------------|-------------|-------------|
| N  | 3.26351050  | -2.33073444 | 0.34228520  |
| C  | 3.94644380  | -3.47973064 | 0.38252480  |
| C  | 3.96116990  | -1.18637494 | 0.30216590  |
| C  | 5.32189400  | -3.53401304 | 0.38423770  |
| H  | 3.35780870  | -4.38731604 | 0.41444580  |
| C  | 5.33449200  | -1.14530664 | 0.30056410  |
| H  | 3.38011060  | -0.27394634 | 0.27025540  |
| C  | 6.04094390  | -2.34340654 | 0.34228640  |
| H  | 5.82047760  | -4.49566004 | 0.41798490  |
| H  | 5.86140970  | -0.20139774 | 0.26746380  |
| Au | 1.18943730  | -2.32537504 | 0.34203590  |
| C  | -0.75411830 | -2.32607554 | 0.34200620  |
| N  | -1.91013010 | -2.32842984 | 0.34208400  |
| O  | 7.37541660  | -2.28648574 | 0.33981510  |
| H  | 7.75273360  | -3.17169574 | 0.37021070  |
| N  | 1.18412057  | -4.52426092 | -2.69643509 |
| C  | 0.03443738  | -5.20689083 | -2.67511984 |
| C  | 2.32916601  | -5.22109548 | -2.66194705 |
| C  | -0.01986986 | -6.58123398 | -2.61994368 |
| H  | -0.87369619 | -4.61893470 | -2.70379925 |
| C  | 2.37026548  | -6.59329002 | -2.60630777 |
| H  | 3.24213837  | -4.64030706 | -2.68039720 |
| C  | 1.17145882  | -7.29943979 | -2.58454754 |
| H  | -0.98209463 | -7.07962066 | -2.60498922 |
| H  | 3.31474051  | -7.11956747 | -2.57983347 |
| Au | 1.18948567  | -2.45188809 | -2.78040216 |
| C  | 1.18878695  | -0.50992699 | -2.85911334 |
| N  | 1.18643143  | 0.64513710  | -2.90591324 |
| O  | 1.22843301  | -8.63282593 | -2.53070702 |
| H  | 0.34271827  | -9.01005561 | -2.52091304 |

## 8. Coordinates of the dimeric assemblies subtracted from the CSD

### BIQWEF

|    |             |             |             |
|----|-------------|-------------|-------------|
| Ag | -0.34403669 | -0.82568806 | 0.00000000  |
| Cl | 1.53696331  | -0.82568806 | -1.50700000 |
| N  | -2.18303669 | -0.82568806 | 1.19200000  |
| C  | -3.43003669 | -0.82568806 | 0.41000000  |
| N  | -5.92203669 | -0.82568806 | 0.50300000  |
| C  | -4.67503669 | -0.82568806 | 1.28500000  |
| H  | -5.92603669 | -0.09968806 | -0.02900000 |
| H  | -5.92603669 | -1.55168806 | -0.02900000 |
| H  | -4.66003669 | -0.04168806 | 1.85600000  |
| H  | -4.66003669 | -1.60968806 | 1.85600000  |
| H  | -2.17903669 | -0.09968806 | 1.72400000  |
| H  | -2.17903669 | -1.55168806 | 1.72400000  |
| H  | -3.44503669 | -0.04168806 | -0.16200000 |
| H  | -3.44503669 | -1.60968806 | -0.16200000 |
| Ag | -7.76103669 | -0.82568806 | 1.69500000  |
| Cl | -9.64203669 | -0.82568806 | 3.20200000  |
| Ag | 7.70996331  | 1.85831194  | 0.00000000  |
| Cl | 9.59096331  | 1.85831194  | -1.50700000 |
| N  | 5.87196331  | 1.85831194  | 1.19200000  |
| H  | 5.87496331  | 1.13231194  | 1.72400000  |
| H  | 5.87496331  | 2.58331194  | 1.72400000  |
| C  | 4.62496331  | 1.85831194  | 0.41000000  |
| H  | 4.60996331  | 1.07431194  | -0.16200000 |
| H  | 4.60996331  | 2.64131194  | -0.16200000 |
| N  | 2.13196331  | 1.85831194  | 0.50300000  |
| H  | 2.12896331  | 1.13231194  | -0.02900000 |
| H  | 2.12896331  | 2.58331194  | -0.02900000 |
| C  | 3.37896331  | 1.85831194  | 1.28500000  |
| H  | 3.39396331  | 1.07431194  | 1.85600000  |
| H  | 3.39396331  | 2.64131194  | 1.85600000  |
| Ag | 0.29396331  | 1.85831194  | 1.69500000  |
| Cl | -1.58703669 | 1.85831194  | 3.20200000  |

### YUXVUJ

|    |             |             |             |
|----|-------------|-------------|-------------|
| Ag | -1.37614678 | 0.18348624  | 0.00000000  |
| Cl | -3.05714678 | 1.77348624  | -0.52300000 |
| N  | 0.33485322  | -0.97551376 | 0.64400000  |
| H  | 0.12385322  | -1.41351376 | 1.43200000  |
| H  | 0.53485322  | -1.54251376 | 0.01900000  |
| C  | 2.66885322  | -0.93951376 | 1.56400000  |
| C  | 3.65185322  | -1.59051376 | 0.83300000  |
| H  | 3.62585322  | -1.56151376 | -0.11600000 |
| C  | 4.67285322  | -2.28451376 | 1.47100000  |
| H  | 5.34385322  | -2.71951376 | 0.95800000  |
| C  | 4.71085322  | -2.33951376 | 2.85900000  |
| H  | 5.40385322  | -2.81751376 | 3.29800000  |
| C  | 3.73985322  | -1.70051376 | 3.59300000  |
| H  | 3.76485322  | -1.73451376 | 4.54200000  |
| C  | 2.71685322  | -1.00351376 | 2.95400000  |
| H  | 2.04985322  | -0.56851376 | 3.47000000  |
| C  | 1.56285322  | -0.16851376 | 0.90000000  |
| H  | 1.32585322  | 0.60348624  | 1.47100000  |
| H  | 1.89685322  | 0.18648624  | 0.03800000  |
| Ag | -2.23214678 | 0.18348624  | 2.99600000  |
| Cl | -0.55014678 | 1.77348624  | 3.51900000  |
| N  | -3.94214678 | -0.97551376 | 2.35200000  |
| H  | -3.73214678 | -1.41351376 | 1.56400000  |
| H  | -4.14314678 | -1.54251376 | 2.97700000  |
| C  | -6.27614678 | -0.93951376 | 1.43200000  |
| C  | -7.26014678 | -1.59051376 | 2.16300000  |
| H  | -7.23414678 | -1.56151376 | 3.11200000  |
| C  | -8.28114678 | -2.28451376 | 1.52500000  |
| H  | -8.95214678 | -2.71951376 | 2.03800000  |
| C  | -8.31914678 | -2.33951376 | 0.13700000  |
| H  | -9.01214678 | -2.81751376 | -0.30200000 |
| C  | -7.34714678 | -1.70051376 | -0.59800000 |
| H  | -7.37314678 | -1.73451376 | -1.54600000 |
| C  | -6.32514678 | -1.00351376 | 0.04100000  |
| H  | -5.65814678 | -0.56851376 | -0.47400000 |
| C  | -5.17114678 | -0.16851376 | 2.09600000  |
| H  | -4.93414678 | 0.60348624  | 1.52500000  |
| H  | -5.50514678 | 0.18648624  | 2.95800000  |

### UJOQAN

|   |             |            |            |
|---|-------------|------------|------------|
| N | -3.38272903 | 1.76716513 | 0.09723382 |
| C | -3.02172903 | 3.04316513 | 0.04423382 |
| H | -2.09872903 | 3.26116513 | 0.01323382 |
| C | -4.69672903 | 1.45416513 | 0.14823382 |
| H | -4.95572903 | 0.54016513 | 0.18323382 |
| C | -5.28472903 | 3.75616513 | 0.10223382 |
| H | -5.93472903 | 4.44916513 | 0.11623382 |

|    |              |             |             |
|----|--------------|-------------|-------------|
| C  | -5.66472903  | 2.43116513  | 0.15223382  |
| H  | -6.58472903  | 2.19416513  | 0.18723382  |
| C  | -3.94772903  | 4.05016513  | 0.03523382  |
| H  | -3.66172903  | 4.95516513  | -0.01776618 |
| N  | -0.55472903  | -1.10883487 | -0.09876618 |
| C  | -0.84672903  | -2.42783487 | -0.10476618 |
| H  | -1.75172903  | -2.69983487 | -0.02276618 |
| C  | 0.12627097   | -3.38083487 | -0.22576618 |
| H  | -0.10572903  | -4.30283487 | -0.22676618 |
| C  | 0.72527097   | -0.75083487 | -0.22576618 |
| H  | 0.94527097   | 0.17216513  | -0.22376618 |
| C  | 1.43627097   | -2.99583487 | -0.34376618 |
| H  | 2.12727097   | -3.64483487 | -0.41376618 |
| C  | 1.73127097   | -1.66883487 | -0.36076618 |
| H  | 2.63127097   | -1.37883487 | -0.46676618 |
| Au | -2.39272903  | 0.29816513  | -2.97476618 |
| N  | -1.00472903  | 1.76716513  | -3.01976618 |
| C  | -1.36572903  | 3.04316513  | -2.96576618 |
| H  | -2.28872903  | 3.26116513  | -2.93476618 |
| C  | 0.30927097   | 1.45416513  | -3.07076618 |
| H  | 0.56827097   | 0.54016513  | -3.10476618 |
| C  | 0.89727097   | 3.75616513  | -3.02476618 |
| H  | 1.54727097   | 4.44916513  | -3.03776618 |
| C  | 1.27727097   | 2.43116513  | -3.07376618 |
| H  | 2.19727097   | 2.19416513  | -3.10876618 |
| C  | -0.43972903  | 4.05016513  | -2.95676618 |
| H  | -0.72572903  | 4.95516513  | -2.90376618 |
| N  | -3.83272903  | -1.10883487 | -2.82276618 |
| C  | -3.54072903  | -2.42783487 | -2.81676618 |
| H  | -2.63572903  | -2.69983487 | -2.89876618 |
| C  | -4.51372903  | -3.38083487 | -2.69576618 |
| H  | -4.28172903  | -4.30283487 | -2.69476618 |
| C  | -5.11272903  | -0.75083487 | -2.69576618 |
| H  | -5.33272903  | 0.17216513  | -2.69876618 |
| C  | -5.82372903  | -2.99583487 | -2.57776618 |
| H  | -6.51472903  | -3.64483487 | -2.50876618 |
| C  | -6.11872903  | -1.66883487 | -2.56076618 |
| H  | -7.01872903  | -1.37883487 | -2.45476618 |
| Au | -1.99472903  | 0.29816513  | 0.05223382  |
| F  | -9.45572903  | 2.89216513  | 2.92223382  |
| F  | -8.36972903  | 3.89116513  | 1.21423382  |
| F  | -8.83572903  | 1.71616513  | 1.13723382  |
| F  | -10.49572903 | 3.26116513  | 0.99923382  |
| B  | -9.28672903  | 2.93516513  | 1.55223382  |
| F  | 0.45127097   | 7.34516513  | -3.29176618 |
| F  | 1.53727097   | 6.34616513  | -4.99876618 |
| F  | 1.07127097   | 8.52116513  | -5.07576618 |
| F  | -0.58872903  | 6.97516513  | -5.21376618 |
| B  | 0.62027097   | 7.30116513  | -4.66076618 |

**FAZGET**

|    |             |             |             |
|----|-------------|-------------|-------------|
| C  | -3.08205854 | -0.12467756 | 3.20600000  |
| C  | -1.75005854 | -0.12467756 | 2.53000000  |
| C  | -0.56605854 | -0.12467756 | 3.46600000  |
| H  | -0.37605854 | 0.77532244  | 3.73600000  |
| H  | 0.19694146  | -0.49167756 | 3.01100000  |
| H  | -0.76805854 | -0.65767756 | 4.23500000  |
| C  | -5.23005854 | -0.12467756 | 3.45800000  |
| C  | -6.66405854 | -0.12467756 | 3.25000000  |
| C  | -7.59705854 | -0.12467756 | 4.24800000  |
| N  | -3.25805854 | -0.12467756 | 4.50400000  |
| N  | -4.61905854 | -0.12467756 | 4.60100000  |
| H  | -5.03405854 | -0.12467756 | 5.35400000  |
| N  | -4.28905854 | -0.12467756 | 2.53800000  |
| N  | -4.38205854 | -0.12467756 | 1.14200000  |
| H  | -5.15405854 | -0.12467756 | 0.76200000  |
| H  | -3.66705854 | -0.12467756 | 0.66200000  |
| H  | -1.69205854 | -0.90667756 | 1.95800000  |
| H  | -1.69205854 | 0.65732244  | 1.95800000  |
| H  | -6.85505854 | -0.90167756 | 2.70200000  |
| H  | -6.85505854 | 0.65232244  | 2.70200000  |
| H  | -8.45105854 | -0.37767756 | 3.88900000  |
| H  | -7.33905854 | -0.75167756 | 4.93000000  |
| H  | -7.66005854 | 0.75432244  | 4.63100000  |
| Au | 1.43594146  | -0.12467756 | 0.00000000  |
| Au | 1.43594146  | 3.12232244  | 0.00000000  |
| C  | 3.17094146  | -0.12467756 | 0.90400000  |
| C  | -0.15305854 | 3.12232244  | 1.14500000  |
| N  | 4.16994146  | -0.12467756 | 1.41400000  |
| N  | -1.10005854 | 3.12232244  | 1.82200000  |
| C  | -0.30005854 | -0.12467756 | -0.90400000 |
| C  | 3.02394146  | 3.12232244  | -1.14500000 |
| N  | -1.29905854 | -0.12467756 | -1.41400000 |
| N  | 3.97094146  | 3.12232244  | -1.82200000 |
| C  | -3.98405854 | 3.12132244  | -3.20600000 |



|   |             |            |             |
|---|-------------|------------|-------------|
| C | -5.31705854 | 3.12232244 | -2.53000000 |
| H | -5.37505854 | 3.90432244 | -1.95800000 |
| H | -5.37505854 | 2.33932244 | -1.95800000 |
| C | -6.50005854 | 3.12132244 | -3.46600000 |
| H | -6.69105854 | 4.02132244 | -3.73600000 |
| H | -7.26405854 | 2.75532244 | -3.01100000 |
| H | -6.29905854 | 2.58832244 | -4.23500000 |
| C | -1.83705854 | 3.12132244 | -3.45800000 |
| C | -0.40205854 | 3.12132244 | -3.25000000 |
| H | -0.21105854 | 3.89832244 | -2.70200000 |
| H | -0.21105854 | 2.34532244 | -2.70200000 |
| C | 0.53094146  | 3.12132244 | -4.24800000 |
| N | -3.80905854 | 3.12132244 | -4.50400000 |
| N | -2.44705854 | 3.12132244 | -4.60100000 |
| H | -2.03205854 | 3.12132244 | -5.35400000 |
| N | -2.77805854 | 3.12232244 | -2.53800000 |
| N | -2.68505854 | 3.12232244 | -1.14200000 |
| H | -1.91205854 | 3.12232244 | -0.76200000 |
| H | -3.39905854 | 3.12232244 | -0.66200000 |
| H | 1.38494146  | 2.86932244 | -3.88900000 |
| H | 0.27294146  | 2.49532244 | -4.93000000 |
| H | 0.59294146  | 4.00132244 | -4.63100000 |
